# Supplementary material for: Analysis of the role of Purα in the pathogenesis of Alzheimer's disease based on RNA-seq and ChIP-seq
Source: PubMed Central journal article supplement (PMC8190037; doi:10.1038/s41598-021-90982-1), 2021-06-09
Supplement: 41598_2021_90982_MOESM1_ESM.pdf [file 41598_2021_90982_MOESM1_ESM.pdf]

## S1 Differentially expressed genes

| #ID                | preferredName      | FDR_edgeR | log2FC_edg | Fold_differe | regulated |
|--------------------|--------------------|-----------|------------|--------------|-----------|
| ENSMUSG00000118365 | ENSMUSG00000118365 | 5.797E-05 | -1.2327916 | 1.67394889   | down      |
| ENSMUSG00000118097 | ENSMUSG00000118097 | 3.23E-16  | -2.7616822 | 3.91502463   | down      |
| ENSMUSG00000118032 | ENSMUSG00000118032 | 2.736E-06 | 7.79527218 | 2.92222222   | up        |
| ENSMUSG00000117278 | ENSMUSG00000117278 | 2.876E-06 | 2.40082335 | 1.9513382    | up        |
| ENSMUSG00000117192 | ENSMUSG00000117192 | 2.085E-05 | -7.611195  | 2.69411765   | down      |
| ENSMUSG00000117050 | ENSMUSG00000117050 | 2.611E-07 | -2.7874242 | 2.48307692   | down      |
| ENSMUSG00000116508 | ENSMUSG00000116508 | 2.207E-05 | -1.7700952 | 1.74651811   | down      |
| ENSMUSG00000114934 | ENSMUSG00000114934 | 0.0002263 | -1.2001818 | 1.57107723   | down      |
| ENSMUSG00000114835 | ENSMUSG00000114835 | 2.466E-06 | -4.9152023 | 2.96521739   | down      |
| ENSMUSG00000114515 | ENSMUSG00000114515 | 7.087E-06 | -1.9730978 | 1.91826923   | down      |
| ENSMUSG00000114436 | ENSMUSG00000114436 | 0.0002037 | -1.0684386 | 1.62777101   | down      |
| ENSMUSG00000114433 | ENSMUSG00000114433 | 1.284E-14 | -1.9008312 | 3.1545271    | down      |
| ENSMUSG00000113425 | ENSMUSG00000113425 | 0.0001269 | 3.69007558 | 1.74172185   | up        |
| ENSMUSG00000113061 | ENSMUSG00000113061 | 0.001235  | 0.83945327 | 1.58134276   | up        |
| ENSMUSG00000111681 | ENSMUSG00000111681 | 0.0003904 | -2.0268621 | 1.51804124   | down      |
| ENSMUSG00000111394 | ENSMUSG00000111394 | 2.189E-05 | -1.1324917 | 1.83314575   | down      |
| ENSMUSG00000110790 | ENSMUSG00000110790 | 4.253E-06 | 2.43166612 | 1.92802057   | up        |
| ENSMUSG00000110537 | ENSMUSG00000110537 | 8.6E-05   | 2.85820417 | 1.67982456   | up        |
| ENSMUSG00000110185 | ENSMUSG00000110185 | 8.539E-07 | -1.5732145 | 1.97881356   | down      |
| ENSMUSG00000109925 | ENSMUSG00000109925 | 8.548E-06 | 2.69875945 | 1.94333333   | up        |
| ENSMUSG00000109881 | ENSMUSG00000109881 | 7.37E-19  | -2.0677215 | 3.8574756    | down      |
| ENSMUSG00000109724 | ENSMUSG00000109724 | 5.697E-21 | 3.4265589  | 5.29         | up        |
| ENSMUSG00000108137 | ENSMUSG00000108137 | 0.000444  | -3.5998225 | 1.6971831    | down      |
| ENSMUSG00000107997 | ENSMUSG00000107997 | 0.0009939 | -4.1962251 | 1.57391304   | down      |
| ENSMUSG00000107969 | ENSMUSG00000107969 | 0.0002763 | -1.4972143 | 1.51001178   | down      |
| ENSMUSG00000107741 | ENSMUSG00000107741 | 0.0001798 | -2.8542797 | 1.7627907    | down      |
| ENSMUSG00000107191 | ENSMUSG00000107191 | 0.0016709 | 0.83145722 | 1.52430635   | up        |
| ENSMUSG00000106933 | ENSMUSG00000106933 | 4.756E-06 | -1.3246504 | 1.8698946    | down      |
| ENSMUSG00000106383 | ENSMUSG00000106383 | 0.0001798 | -2.8542797 | 1.7627907    | down      |
| ENSMUSG00000105366 | ENSMUSG00000105366 | 6.734E-05 | 1.95525282 | 1.57640232   | up        |
| ENSMUSG00000105302 | ENSMUSG00000105302 | 3.484E-07 | -8.0243866 | 3.85882353   | down      |
| ENSMUSG00000104671 | ENSMUSG00000104671 | 0.000444  | 3.52735601 | 1.50993377   | up        |
| ENSMUSG00000103309 | ENSMUSG00000103309 | 9.138E-07 | -1.3008623 | 2.02195333   | down      |
| ENSMUSG00000103270 | ENSMUSG00000103270 | 1.353E-05 | -1.6913094 | 1.78555305   | down      |
| ENSMUSG00000103082 | ENSMUSG00000103082 | 6.151E-05 | 1.70026195 | 1.54520918   | up        |
| ENSMUSG00000103034 | ENSMUSG00000103034 | 0.0001752 | -1.4203839 | 1.54868914   | down      |
| ENSMUSG00000102929 | ENSMUSG00000102929 | 0.0003945 | -4.3329242 | 1.7826087    | down      |
| ENSMUSG00000102918 | ENSMUSG00000102918 | 0.0003244 | -0.9531882 | 1.68730131   | down      |
| ENSMUSG00000102311 | ENSMUSG00000102311 | 0.0003003 | 3.58365989 | 1.58940397   | up        |
| ENSMUSG00000102224 | ENSMUSG00000102224 | 2.704E-11 | -1.5887839 | 2.736814     | down      |
| ENSMUSG00000101859 | ENSMUSG00000101859 | 0.0002599 | -1.1636521 | 1.5576225    | down      |
| ENSMUSG00000101355 | Hist1h3h           | 0.000444  | 3.52735601 | 1.50993377   | up        |
| ENSMUSG00000101162 | ENSMUSG00000101162 | 0.0007677 | -0.9829489 | 1.53248621   | down      |
| ENSMUSG00000101111 | ENSMUSG00000101111 | 0.0030636 | -0.788544  | 1.59502584   | down      |
| ENSMUSG00000100131 | ENSMUSG00000100131 | 5.217E-07 | -1.3247723 | 2.05383132   | down      |
| ENSMUSG00000099632 | ENSMUSG00000099632 | 0.0002263 | 2.60097179 | 1.51383399   | up        |

|                    |                    |           |            |            |      |
|--------------------|--------------------|-----------|------------|------------|------|
| ENSMUSG00000099583 | Hist1h3d           | 3.965E-05 | 3.4122911  | 1.87640449 | up   |
| ENSMUSG00000097993 | ENSMUSG00000097993 | 5.113E-09 | 2.09994029 | 2.31130064 | up   |
| ENSMUSG00000097960 | ENSMUSG00000097960 | 3.965E-05 | -2.494758  | 1.85197368 | down |
| ENSMUSG00000097903 | ENSMUSG00000097903 | 2.293E-06 | -2.2345713 | 2.07786885 | down |
| ENSMUSG00000097893 | ENSMUSG00000097893 | 0.0004135 | -2.9523928 | 1.64583333 | down |
| ENSMUSG00000097418 | ENSMUSG00000097418 | 0.0003945 | -4.3329242 | 1.7826087  | down |
| ENSMUSG00000097216 | ENSMUSG00000097216 | 1.417E-08 | -1.5868331 | 2.2482663  | down |
| ENSMUSG00000097204 | ENSMUSG00000097204 | 0.0009593 | -0.9467492 | 1.53182092 | down |
| ENSMUSG00000097081 | ENSMUSG00000097081 | 2.26E-05  | 1.2022905  | 1.67083855 | up   |
| ENSMUSG00000097078 | Gm26566            | 0.0002002 | -1.3303296 | 1.55239521 | down |
| ENSMUSG00000096001 | Gpr15l             | 1.165E-15 | -2.5352091 | 3.62891344 | down |
| ENSMUSG00000095653 | Gm21818            | 4.026E-07 | 4.23821188 | 2.78145695 | up   |
| ENSMUSG00000095427 | Rps2-ps6           | 0.0001289 | 1.14280393 | 1.53884869 | up   |
| ENSMUSG00000095180 | Rhox5              | 2.718E-07 | 1.47433038 | 1.92824641 | up   |
| ENSMUSG00000092564 | ENSMUSG00000092564 | 5.318E-05 | 1.57866631 | 1.58174524 | up   |
| ENSMUSG00000092365 | ENSMUSG00000092365 | 4.262E-05 | 1.36227751 | 1.57577566 | up   |
| ENSMUSG00000092300 | ENSMUSG00000092300 | 5.892E-05 | 2.89555601 | 1.73245614 | up   |
| ENSMUSG00000092220 | ENSMUSG00000092220 | 4.261E-10 | -1.729372  | 2.47508185 | down |
| ENSMUSG00000092203 | ENSMUSG00000092203 | 9.005E-05 | 1.02068247 | 1.67434263 | up   |
| ENSMUSG00000091479 | ENSMUSG00000091479 | 5.697E-21 | -2.2292997 | 4.18459447 | down |
| ENSMUSG00000091421 | ENSMUSG00000091421 | 0.000157  | -1.2109369 | 1.58731707 | down |
| ENSMUSG00000091412 | ENSMUSG00000091412 | 7.006E-19 | -2.8363322 | 4.37539103 | down |
| ENSMUSG00000091337 | Eid1               | 0.005845  | -0.7364614 | 1.56782092 | down |
| ENSMUSG00000091119 | Ccdc152            | 9.24E-07  | -3.8232209 | 2.79761905 | down |
| ENSMUSG00000090863 | ENSMUSG00000090863 | 0.0001009 | -1.1460937 | 1.66261028 | down |
| ENSMUSG00000090854 | Gm4340             | 6.075E-05 | 3.09373638 | 1.75980392 | up   |
| ENSMUSG00000090799 | Klhl33             | 5.318E-05 | -3.8616756 | 2.13380282 | down |
| ENSMUSG00000090733 | Rps27              | 0.0030111 | 0.78292065 | 1.52892543 | up   |
| ENSMUSG00000090235 | ENSMUSG00000090235 | 0.0004135 | -2.9523928 | 1.64583333 | down |
| ENSMUSG00000090208 | ENSMUSG00000090208 | 8.125E-07 | -1.8119273 | 2.00531915 | down |
| ENSMUSG00000090145 | Ugt1a6b            | 1.151E-08 | -2.7679914 | 2.75773196 | down |
| ENSMUSG00000089961 | ENSMUSG00000089961 | 7.38E-17  | -2.3836733 | 3.66628702 | down |
| ENSMUSG00000089698 | ENSMUSG00000089698 | 8.967E-05 | -3.1268258 | 1.90625    | down |
| ENSMUSG00000087700 | ENSMUSG00000087700 | 2.706E-08 | -1.7349192 | 2.22888617 | down |
| ENSMUSG00000087400 | ENSMUSG00000087400 | 3.012E-09 | 1.83190325 | 2.22940818 | up   |
| ENSMUSG00000087370 | Tmem170b           | 0.0002793 | -1.2694733 | 1.53637566 | down |
| ENSMUSG00000087141 | Plcx2              | 0.0002036 | -1.3900988 | 1.53832442 | down |
| ENSMUSG00000087095 | ENSMUSG00000087095 | 0.0002222 | -1.5463481 | 1.52711223 | down |
| ENSMUSG00000086930 | ENSMUSG00000086930 | 0.0003686 | -2.3108176 | 1.58881579 | down |
| ENSMUSG00000086815 | ENSMUSG00000086815 | 3.965E-05 | -2.494758  | 1.85197368 | down |
| ENSMUSG00000086725 | ENSMUSG00000086725 | 0.0003167 | -1.6181486 | 1.52857143 | down |
| ENSMUSG00000086717 | ENSMUSG00000086717 | 0.0003167 | -1.6181486 | 1.52857143 | down |
| ENSMUSG00000086514 | ENSMUSG00000086514 | 4.534E-05 | -1.4389243 | 1.67384615 | down |
| ENSMUSG00000085791 | ENSMUSG00000085791 | 3.07E-09  | 4.60757429 | 3.77483444 | up   |
| ENSMUSG00000085754 | ENSMUSG00000085754 | 0.0002242 | -2.0811834 | 1.58762887 | down |
| ENSMUSG00000085711 | ENSMUSG00000085711 | 1.075E-06 | -2.4482726 | 2.21323529 | down |
| ENSMUSG00000085505 | ENSMUSG00000085505 | 1.511E-11 | -1.7825792 | 2.68673012 | down |
| ENSMUSG00000085360 | ENSMUSG00000085360 | 2.736E-06 | -7.8325329 | 3.27058824 | down |

|                    |                    |           |            |            |      |
|--------------------|--------------------|-----------|------------|------------|------|
| ENSMUSG00000085241 | ENSMUSG00000085241 | 7.39E-05  | 1.11194647 | 1.61050463 | up   |
| ENSMUSG00000085178 | ENSMUSG00000085178 | 4.571E-05 | -1.4872002 | 1.66666667 | down |
| ENSMUSG00000084817 | ENSMUSG00000084817 | 0.0002113 | -1.808832  | 1.57586837 | down |
| ENSMUSG00000083773 | ENSMUSG00000083773 | 3.303E-05 | -1.0289869 | 1.99356875 | down |
| ENSMUSG00000082998 | ENSMUSG00000082998 | 1.779E-05 | 2.17575465 | 1.73788546 | up   |
| ENSMUSG00000082450 | ENSMUSG00000082450 | 1.966E-08 | 2.23592472 | 2.28815977 | up   |
| ENSMUSG00000082424 | ENSMUSG00000082424 | 4.951E-14 | -2.0777425 | 3.09492848 | down |
| ENSMUSG00000082314 | ENSMUSG00000082314 | 4.206E-13 | -2.6092699 | 3.33704735 | down |
| ENSMUSG00000082016 | ENSMUSG00000082016 | 6.831E-08 | -1.4419946 | 2.17045204 | down |
| ENSMUSG00000081214 | ENSMUSG00000081214 | 6.933E-05 | 1.16058113 | 1.59131653 | up   |
| ENSMUSG00000079685 | Ubp1               | 5.996E-08 | -1.3346376 | 2.2683152  | down |
| ENSMUSG00000079652 | Fam71f2            | 2.827E-05 | -3.2450701 | 2.109375   | down |
| ENSMUSG00000079560 | Hoxa3              | 1.915E-05 | -2.4819385 | 1.93846154 | down |
| ENSMUSG00000079387 | Luzp4              | 4.095E-11 | -4.8825163 | 5.00704225 | down |
| ENSMUSG00000079343 | C1s2               | 2.554E-05 | -4.6791224 | 2.4173913  | down |
| ENSMUSG00000079018 | Ly6c1              | 0.0001484 | -1.4655304 | 1.57551826 | down |
| ENSMUSG00000078942 | Naip6              | 0.0001951 | -3.042244  | 1.77604167 | down |
| ENSMUSG00000078812 | Eif5a              | 0.0024654 | 0.78572773 | 1.62814985 | up   |
| ENSMUSG00000078771 | Evi2a              | 3.872E-05 | -2.8527337 | 1.97478992 | down |
| ENSMUSG00000078768 | Zfp566             | 5.449E-05 | 1.7239764  | 1.59264126 | up   |
| ENSMUSG00000078651 | Aoc2               | 0.0001183 | 1.54453906 | 1.50746269 | up   |
| ENSMUSG00000078636 | ENSMUSG00000078636 | 1.007E-05 | -1.0895144 | 2.05312891 | down |
| ENSMUSG00000078566 | Bnip3              | 1.304E-19 | -2.09368   | 4.04147671 | down |
| ENSMUSG00000078497 | Gm13145            | 2.951E-06 | 1.95749847 | 1.81938326 | up   |
| ENSMUSG00000078300 | ENSMUSG00000078300 | 1.214E-05 | -1.8126877 | 1.80501393 | down |
| ENSMUSG00000077222 | ENSMUSG00000077222 | 1.295E-05 | 7.63255261 | 2.53333333 | up   |
| ENSMUSG00000076454 | ENSMUSG00000076454 | 4.948E-05 | 1.10017863 | 1.66077146 | up   |
| ENSMUSG00000075324 | Fign               | 5.922E-05 | -1.4892527 | 1.6427256  | down |
| ENSMUSG00000075254 | Heg1               | 0.0034262 | -0.7982603 | 1.53327444 | down |
| ENSMUSG00000074934 | Grem1              | 1.34E-08  | -1.3848943 | 2.35323933 | down |
| ENSMUSG00000074813 | ENSMUSG00000074813 | 2.445E-05 | 1.33545161 | 1.62181996 | up   |
| ENSMUSG00000074794 | Arrdc3             | 2.71E-05  | -1.1994867 | 1.75617198 | down |
| ENSMUSG00000074749 | Kiz                | 0.0001965 | -1.0508695 | 1.6370673  | down |
| ENSMUSG00000074604 | Mgst2              | 4.43E-05  | -1.1605634 | 1.73198483 | down |
| ENSMUSG00000074398 | ENSMUSG00000074398 | 2.732E-05 | -1.2784638 | 1.72934828 | down |
| ENSMUSG00000074305 | Peak1              | 0.0054353 | -0.7502327 | 1.53734887 | down |
| ENSMUSG00000073652 | ENSMUSG00000073652 | 1.193E-05 | -1.366511  | 1.78390244 | down |
| ENSMUSG00000073198 | Bnip3l-ps          | 0.0001872 | -1.1958652 | 1.57581574 | down |
| ENSMUSG00000073177 | Gm773              | 1.463E-16 | -2.2008284 | 3.49011713 | down |
| ENSMUSG00000072941 | Sod3               | 9.128E-11 | -1.6297144 | 2.60085444 | down |
| ENSMUSG00000072768 | ENSMUSG00000072768 | 1.297E-10 | -8.6075009 | 6.30588235 | down |
| ENSMUSG00000072623 | Zfp9               | 0.0002847 | -1.0660866 | 1.59013653 | down |
| ENSMUSG00000072620 | Sifn2              | 2.119E-05 | -1.7306375 | 1.74580645 | down |
| ENSMUSG00000071793 | ENSMUSG00000071793 | 0.0003244 | -1.2309806 | 1.53265428 | down |
| ENSMUSG00000071658 | Gng3               | 8.967E-05 | 3.05323886 | 1.69607843 | up   |
| ENSMUSG00000071552 | Tigit              | 3.927E-07 | 2.09463377 | 1.99697428 | up   |
| ENSMUSG00000071547 | Nt5dc2             | 0.0046884 | -0.7497357 | 1.59839555 | down |
| ENSMUSG00000071052 | Rpl7a-ps5          | 7.923E-05 | 1.28651458 | 1.53994778 | up   |

|                    |                    |           |            |            |      |
|--------------------|--------------------|-----------|------------|------------|------|
| ENSMUSG00000071042 | Rasgrp3            | 4.081E-05 | 1.49927017 | 1.58989229 | up   |
| ENSMUSG00000070867 | Trabd2b            | 9.976E-08 | -3.6683773 | 3          | down |
| ENSMUSG00000070348 | Ccnd1              | 0.0023921 | 0.79689776 | 1.55221029 | up   |
| ENSMUSG00000070319 | Eif3g              | 0.0004037 | 0.90266249 | 1.66405791 | up   |
| ENSMUSG00000070034 | Sp110              | 0.0003053 | -3.2569284 | 1.72619048 | down |
| ENSMUSG00000070031 | Sp140              | 8.092E-05 | -1.2041862 | 1.6546169  | down |
| ENSMUSG00000068113 | Gm4907             | 1.632E-09 | 2.66747497 | 2.63578947 | up   |
| ENSMUSG00000067629 | Syngap1            | 3.066E-05 | -1.2477578 | 1.73481266 | down |
| ENSMUSG00000067288 | Rps28              | 0.0004738 | 0.88743089 | 1.68323801 | up   |
| ENSMUSG00000067085 | Mxi1               | 1.979E-07 | -1.6643721 | 2.08403361 | down |
| ENSMUSG00000066026 | Dhrs3              | 4.103E-18 | -2.4155568 | 3.8284085  | down |
| ENSMUSG00000064373 | Sepp1              | 9.183E-11 | -2.7657621 | 3.15368852 | down |
| ENSMUSG00000064358 | mt-Co3             | 0.0012664 | -0.8651924 | 1.60329755 | down |
| ENSMUSG00000064330 | Pde6h              | 3.447E-08 | -1.446479  | 2.21503293 | down |
| ENSMUSG00000064264 | Zfp428             | 5.31E-05  | 1.1001816  | 1.65533981 | up   |
| ENSMUSG00000064246 | Chil1              | 6.977E-42 | -7.9901836 | 33.7478261 | down |
| ENSMUSG00000063888 | Rpl7l1             | 2.097E-06 | 1.16065311 | 2.00703766 | up   |
| ENSMUSG00000063802 | Hspbp1             | 0.001207  | 0.85253384 | 1.54242395 | up   |
| ENSMUSG00000063632 | Sox11              | 1.539E-12 | 2.21199237 | 2.79788039 | up   |
| ENSMUSG00000063382 | Bcl9l              | 0.0078922 | -0.7167393 | 1.53097207 | down |
| ENSMUSG00000063229 | Ldha               | 0.0013382 | -0.8217251 | 1.78134237 | down |
| ENSMUSG00000063193 | Cd300lb            | 9.1E-05   | -1.4803467 | 1.6042677  | down |
| ENSMUSG00000063011 | Msln               | 0.0001278 | 0.97132097 | 1.72470393 | up   |
| ENSMUSG00000062901 | Klhl24             | 5.988E-10 | -1.7015127 | 2.4557777  | down |
| ENSMUSG00000062554 | ENSMUSG00000062554 | 1.491E-22 | -2.7909802 | 4.81661342 | down |
| ENSMUSG00000062515 | Fabp4              | 9.957E-05 | -4.516383  | 2.09565217 | down |
| ENSMUSG00000062380 | Tubb3              | 3.996E-05 | 1.08936003 | 1.69031709 | up   |
| ENSMUSG00000062300 | Pvrl2              | 0.000444  | -0.9103457 | 1.71106427 | down |
| ENSMUSG00000062070 | Pgk1               | 7.27E-05  | -0.9845711 | 1.9835388  | down |
| ENSMUSG00000061878 | Sphk1              | 0.0016112 | -0.8344257 | 1.62154777 | down |
| ENSMUSG00000061815 | Rufy4              | 0.0001122 | -2.7487066 | 1.81092437 | down |
| ENSMUSG00000061458 | Nol10              | 1.731E-05 | 1.16488906 | 1.71749108 | up   |
| ENSMUSG00000061360 | Phf5a              | 0.0022767 | 0.80975038 | 1.51436691 | up   |
| ENSMUSG00000061353 | Cxcl12             | 5.438E-08 | -1.2995349 | 2.39441366 | down |
| ENSMUSG00000061024 | Rrs1               | 0.0014923 | 0.8424687  | 1.52026234 | up   |
| ENSMUSG00000060961 | Slc4a4             | 1.247E-07 | -1.6314621 | 2.11719606 | down |
| ENSMUSG00000060771 | Tsga10             | 0.0001648 | -1.7041226 | 1.59516616 | down |
| ENSMUSG00000060639 | Hist1h4i           | 0.0005464 | 0.95479456 | 1.50764873 | up   |
| ENSMUSG00000060459 | Kng2               | 8.182E-06 | -2.4174239 | 2.01089918 | down |
| ENSMUSG00000060224 | Pyroxd2            | 1.968E-06 | -1.4341107 | 1.90864086 | down |
| ENSMUSG00000060131 | Atp8b4             | 2.628E-06 | -1.4815913 | 1.9016129  | down |
| ENSMUSG00000059456 | Ptk2b              | 2.736E-06 | -7.8325329 | 3.27058824 | down |
| ENSMUSG00000059159 | ENSMUSG00000059159 | 1.972E-05 | 1.41227376 | 1.64167651 | up   |
| ENSMUSG00000058656 | Samd12             | 0.0002263 | -2.6749395 | 1.70168067 | down |
| ENSMUSG00000058420 | Syt17              | 1.74E-06  | -1.3806604 | 1.93522961 | down |
| ENSMUSG00000057863 | Rpl36              | 0.0040376 | 0.75443936 | 1.55499973 | up   |
| ENSMUSG00000057666 | Gapdh              | 0.0028009 | -0.7847158 | 1.64966893 | down |
| ENSMUSG00000057329 | Bcl2               | 8.357E-06 | 1.11881408 | 1.86250968 | up   |

|                    |                    |           |            |            |      |
|--------------------|--------------------|-----------|------------|------------|------|
| ENSMUSG00000057322 | Rpl38              | 0.0009132 | 0.85280451 | 1.62504704 | up   |
| ENSMUSG00000057193 | Slc44a2            | 0.0077813 | -0.7189596 | 1.52826427 | down |
| ENSMUSG00000057000 | Nxf3               | 2.085E-05 | -7.611195  | 2.69411765 | down |
| ENSMUSG00000056749 | Nfil3              | 0.0007945 | -0.904632  | 1.61586133 | down |
| ENSMUSG00000056536 | Pign               | 0.0046513 | -0.7784414 | 1.5044089  | down |
| ENSMUSG00000056270 | Prr9               | 9.954E-07 | -7.9316466 | 3.56470588 | down |
| ENSMUSG00000056209 | Npm3               | 0.0001441 | 0.97250767 | 1.69313821 | up   |
| ENSMUSG00000056043 | Rgs9bp             | 0.0002932 | -1.8963228 | 1.54700855 | down |
| ENSMUSG00000055782 | Abcd2              | 1.547E-09 | -2.473152  | 2.75384615 | down |
| ENSMUSG00000055675 | Kbtbd11            | 0.0001694 | -2.4782428 | 1.71276596 | down |
| ENSMUSG00000055493 | Epm2a              | 1.843E-07 | -2.8944348 | 2.5625     | down |
| ENSMUSG00000055322 | Tns1               | 1.986E-05 | -1.1192283 | 1.85657325 | down |
| ENSMUSG00000055172 | C1ra               | 2.294E-07 | -1.3226757 | 2.13282499 | down |
| ENSMUSG00000055116 | Arntl              | 0.0001213 | -1.3035664 | 1.61077111 | down |
| ENSMUSG00000055030 | Sprr2e             | 8.798E-06 | -3.3543529 | 2.3125     | down |
| ENSMUSG00000054793 | Cadm4              | 6.731E-05 | 1.34258415 | 1.54301403 | up   |
| ENSMUSG00000054626 | Xlr                | 2.171E-05 | -1.12392   | 1.84017972 | down |
| ENSMUSG00000054568 | Usp17la            | 0.0001033 | 1.95482418 | 1.53830645 | up   |
| ENSMUSG00000054293 | P2ry10b            | 8.555E-09 | -2.1486235 | 2.41419355 | down |
| ENSMUSG00000054263 | Lifr               | 3.419E-07 | -1.3805414 | 2.05901563 | down |
| ENSMUSG00000053801 | Grwd1              | 0.0002778 | 0.93812084 | 1.64377722 | up   |
| ENSMUSG00000053746 | Pthr1              | 4.43E-05  | 1.07159731 | 1.70490196 | up   |
| ENSMUSG00000053702 | Nebi               | 7.429E-06 | 1.85874626 | 1.77003942 | up   |
| ENSMUSG00000053613 | ENSMUSG00000053613 | 0.000455  | -1.2140463 | 1.50030921 | down |
| ENSMUSG00000053470 | Kdm3a              | 0.0001466 | -1.0104911 | 1.72604807 | down |
| ENSMUSG00000053332 | ENSMUSG00000053332 | 0.0016825 | 0.82390448 | 1.54708274 | up   |
| ENSMUSG00000052957 | Gas1               | 9.921E-11 | -1.5310529 | 2.70619613 | down |
| ENSMUSG00000052477 | ENSMUSG00000052477 | 0.0001545 | -1.3244298 | 1.58044383 | down |
| ENSMUSG00000052353 | Cemip              | 4.261E-10 | -1.6780897 | 2.46930342 | down |
| ENSMUSG00000052331 | Ankrd44            | 1.74E-05  | -1.3471489 | 1.75454993 | down |
| ENSMUSG00000052143 | Gm9869             | 2.092E-05 | -2.5512049 | 1.9375     | down |
| ENSMUSG00000052085 | Dock8              | 9.9E-05   | 2.56051802 | 1.60869565 | up   |
| ENSMUSG00000051627 | Hist1h1e           | 0.0001269 | -3.762562  | 1.95774648 | down |
| ENSMUSG00000051457 | Spn                | 0.0001176 | 1.39731007 | 1.50614439 | up   |
| ENSMUSG00000051048 | P4ha3              | 0.0005609 | -0.9347446 | 1.62233055 | down |
| ENSMUSG00000051037 | Zfp455             | 0.0007531 | -2.4184649 | 1.50191571 | down |
| ENSMUSG00000050965 | Prkca              | 0.0001836 | -0.9866227 | 1.72426938 | down |
| ENSMUSG00000050953 | Gja1               | 7.14E-05  | -1.0087201 | 1.84833544 | down |
| ENSMUSG00000050914 | Ankrd37            | 1.293E-14 | -2.0961322 | 3.17924909 | down |
| ENSMUSG00000050737 | Ptges              | 3.738E-05 | -1.5204759 | 1.68232044 | down |
| ENSMUSG00000050671 | lsm2               | 3.477E-05 | 3.83628831 | 1.97350993 | up   |
| ENSMUSG00000050359 | Sprr1a             | 6.008E-07 | -1.3519095 | 2.02762803 | down |
| ENSMUSG00000050332 | Amer1              | 2.064E-05 | -1.2618023 | 1.76872399 | down |
| ENSMUSG00000049694 | BC048671           | 1.295E-05 | 7.63255261 | 2.53333333 | up   |
| ENSMUSG00000049555 | Tmie               | 0.0002735 | -1.3470348 | 1.51969824 | down |
| ENSMUSG00000049097 | Ankrd34a           | 0.0001954 | -1.1785673 | 1.57972309 | down |
| ENSMUSG00000049092 | Gpr137c            | 0.0003686 | -2.3108176 | 1.58881579 | down |
| ENSMUSG00000048826 | Dact2              | 0.0005478 | -1.0911295 | 1.51231328 | down |

|                    |                    |           |            |            |      |
|--------------------|--------------------|-----------|------------|------------|------|
| ENSMUSG00000048756 | Foxo3              | 0.0001574 | -0.978341  | 1.76278592 | down |
| ENSMUSG00000048706 | Lurap1l            | 3.363E-06 | 1.22044583 | 1.83215816 | up   |
| ENSMUSG00000048562 | Sp8                | 5.318E-05 | 3.78917821 | 1.90066225 | up   |
| ENSMUSG00000048347 | Pcdhb18            | 2.931E-06 | -2.7993638 | 2.23404255 | down |
| ENSMUSG00000048126 | Col6a3             | 1.673E-10 | -1.793377  | 2.54268293 | down |
| ENSMUSG00000047996 | Prrg1              | 1.558E-06 | -1.3438343 | 1.94824191 | down |
| ENSMUSG00000047822 | Gm6484             | 4.765E-08 | -8.1936958 | 4.45882353 | down |
| ENSMUSG00000047749 | Zc3hav1l           | 3.306E-05 | -1.3291096 | 1.71741344 | down |
| ENSMUSG00000047747 | Rnf150             | 1.452E-13 | -1.9595666 | 3.00468165 | down |
| ENSMUSG00000047632 | Fgfbp3             | 4.202E-05 | 1.25384538 | 1.60389105 | up   |
| ENSMUSG00000047562 | Mmp10              | 0.0002125 | -1.5870993 | 1.52917232 | down |
| ENSMUSG00000047250 | Ptgs1              | 0.0002793 | -0.930161  | 1.77389607 | down |
| ENSMUSG00000047153 | Khynyn             | 0.000333  | -0.9670761 | 1.65794745 | down |
| ENSMUSG00000047139 | Cd24a              | 0.0078922 | -0.7186891 | 1.52228031 | down |
| ENSMUSG00000046711 | Hmga1              | 0.0032068 | 0.77858967 | 1.5221736  | up   |
| ENSMUSG00000045790 | Ccdc149            | 1.007E-07 | -3.2833821 | 2.81512605 | down |
| ENSMUSG00000045667 | Smtnl2             | 6.336E-11 | -2.0958985 | 2.7078926  | down |
| ENSMUSG00000045629 | Sh3tc2             | 1.915E-05 | -1.5103281 | 1.74498797 | down |
| ENSMUSG00000045518 | Onecut3            | 2.337E-07 | 3.06374015 | 2.43478261 | up   |
| ENSMUSG00000045092 | S1pr1              | 1.055E-05 | -1.3887497 | 1.80654762 | down |
| ENSMUSG00000044674 | Fzd1               | 0.0010235 | -0.8657387 | 1.64182393 | down |
| ENSMUSG00000044548 | Dact1              | 7.23E-08  | -1.9677111 | 2.20993228 | down |
| ENSMUSG00000044337 | Ackr3              | 8.769E-06 | -1.1511758 | 1.91861063 | down |
| ENSMUSG00000043991 | Pura               | 2.806E-22 | -2.8361448 | 4.82932166 | down |
| ENSMUSG00000043587 | Pxylp1             | 1.817E-06 | -1.2101342 | 2.03810797 | down |
| ENSMUSG00000043333 | Rhbdl2             | 2.554E-05 | -4.6791224 | 2.4173913  | down |
| ENSMUSG00000043067 | Dpy19l1            | 1.242E-05 | -1.0883368 | 1.99795334 | down |
| ENSMUSG00000042988 | Notum              | 0.0007425 | -0.9451905 | 1.56721421 | down |
| ENSMUSG00000042804 | Gpr153             | 7.567E-05 | -1.1241014 | 1.70195052 | down |
| ENSMUSG00000042734 | Ttc9               | 1.594E-05 | -1.5012166 | 1.76251897 | down |
| ENSMUSG00000042650 | Alkbh5             | 0.0026414 | -0.7943263 | 1.623789   | down |
| ENSMUSG00000042599 | Kdm7a              | 2.581E-05 | -2.1371566 | 1.83035714 | down |
| ENSMUSG00000042549 | ENSMUSG00000042549 | 3.241E-05 | 1.61180103 | 1.62286861 | up   |
| ENSMUSG00000042501 | Cpa6               | 0.0005319 | -2.7291967 | 1.58604651 | down |
| ENSMUSG00000042473 | Tbc1d8b            | 0.0007243 | -0.9864111 | 1.53761643 | down |
| ENSMUSG00000042460 | C1galt1            | 0.0012943 | -0.9262942 | 1.51178918 | down |
| ENSMUSG00000042444 | Fam63b             | 0.0003679 | -0.9897132 | 1.61884009 | down |
| ENSMUSG00000042340 | Ctf1               | 2.732E-05 | 1.28836202 | 1.63346774 | up   |
| ENSMUSG00000042198 | Chchd7             | 0.0001901 | 1.0138244  | 1.58617049 | up   |
| ENSMUSG00000042109 | Csdc2              | 0.0002688 | 1.04778038 | 1.51346417 | up   |
| ENSMUSG00000041974 | Spidr              | 0.0049103 | -0.7746639 | 1.50334957 | down |
| ENSMUSG00000041841 | Rpl37              | 0.0008543 | 0.85342721 | 1.65080196 | up   |
| ENSMUSG00000041797 | Abca9              | 6.456E-05 | -1.2968267 | 1.66226913 | down |
| ENSMUSG00000041757 | Plekha6            | 0.0001292 | -1.435664  | 1.57642726 | down |
| ENSMUSG00000041695 | Kcnj2              | 2.126E-18 | -3.105578  | 4.64385692 | down |
| ENSMUSG00000041642 | Kif21b             | 0.0063882 | -0.7365338 | 1.53261598 | down |
| ENSMUSG00000041577 | Prelp              | 1.047E-08 | -1.5164944 | 2.28332202 | down |
| ENSMUSG00000041556 | Fbxo2              | 0.0001466 | -0.9667183 | 1.81610894 | down |

|                    |          |           |            |            |      |
|--------------------|----------|-----------|------------|------------|------|
| ENSMUSG00000041506 | Rrp9     | 0.00058   | 0.8976031  | 1.5852757  | up   |
| ENSMUSG00000041417 | Pik3r1   | 0.0037449 | -0.7946745 | 1.52124068 | down |
| ENSMUSG00000041040 | Fam117b  | 0.0005161 | -0.9505993 | 1.614669   | down |
| ENSMUSG00000040943 | Tet2     | 9.325E-10 | -2.0084611 | 2.50382979 | down |
| ENSMUSG00000040888 | Gfer     | 0.0003973 | 0.94149452 | 1.57335596 | up   |
| ENSMUSG00000040690 | Col16a1  | 0.0033694 | -0.7713724 | 1.63903548 | down |
| ENSMUSG00000040675 | Mthfd1l  | 0.0062586 | -0.7333612 | 1.55426198 | down |
| ENSMUSG00000040653 | Ppp1r14c | 6.21E-10  | -1.7658734 | 2.44902482 | down |
| ENSMUSG00000040624 | Plekhg1  | 0.0003962 | -1.8050206 | 1.50590551 | down |
| ENSMUSG00000040570 | Rundc3b  | 0.0001849 | -1.9044775 | 1.59631148 | down |
| ENSMUSG00000040473 | Cfap69   | 1.308E-05 | -1.1606177 | 1.86745782 | down |
| ENSMUSG00000040447 | Spns2    | 0.0001545 | 2.14753027 | 1.52956298 | up   |
| ENSMUSG00000040433 | Zbtb38   | 0.0029436 | -0.8209187 | 1.52789342 | down |
| ENSMUSG00000040249 | Lrp1     | 0.0060121 | -0.728225  | 1.60180571 | down |
| ENSMUSG00000040152 | Thbs1    | 0.0041878 | -0.7583545 | 1.60398129 | down |
| ENSMUSG00000040128 | Pnrc1    | 3.444E-05 | -1.0691751 | 1.85243205 | down |
| ENSMUSG00000040093 | Bmf      | 3.404E-13 | -2.7858214 | 3.54876033 | down |
| ENSMUSG00000040026 | Saa3     | 8.133E-56 | -3.8908019 | 12.8489196 | down |
| ENSMUSG00000039840 | Epg5     | 1.581E-05 | -1.319449  | 1.76679671 | down |
| ENSMUSG00000039831 | Arhgap29 | 0.0005932 | -0.9164449 | 1.64356261 | down |
| ENSMUSG00000039787 | Cercam   | 0.0005149 | -0.9045359 | 1.69466503 | down |
| ENSMUSG00000039765 | Cc2d2a   | 0.0005139 | -1.1064402 | 1.50903614 | down |
| ENSMUSG00000039704 | Lmbrd2   | 0.0001292 | -1.0472857 | 1.6966672  | down |
| ENSMUSG00000039485 | Tspyl4   | 8.616E-05 | -1.3223949 | 1.6374092  | down |
| ENSMUSG00000039481 | Nrtn     | 0.0001346 | 1.19262957 | 1.518684   | up   |
| ENSMUSG00000039474 | Wfs1     | 8.616E-05 | -1.0172602 | 1.79725555 | down |
| ENSMUSG00000039405 | Prss23   | 0.0002599 | 0.96348176 | 1.6059608  | up   |
| ENSMUSG00000039316 | Rftn1    | 3.543E-10 | 3.75779511 | 3.51754386 | up   |
| ENSMUSG00000039286 | Fndc3b   | 0.0002322 | -0.9728073 | 1.70720639 | down |
| ENSMUSG00000039191 | Rbpj     | 0.000363  | -0.917747  | 1.74565009 | down |
| ENSMUSG00000039126 | Prune2   | 0.001855  | -0.853365  | 1.55252374 | down |
| ENSMUSG00000038963 | Slco4a1  | 0.0001772 | -1.3437932 | 1.5629742  | down |
| ENSMUSG00000038843 | Gcnt1    | 9.114E-05 | -7.4196036 | 2.27058824 | down |
| ENSMUSG00000038648 | Creb3l2  | 0.0024377 | -0.8415995 | 1.52818192 | down |
| ENSMUSG00000038587 | Akap12   | 1.181E-06 | 1.31106713 | 1.87031125 | up   |
| ENSMUSG00000038539 | Atf5     | 0.0018116 | 0.8215586  | 1.53508835 | up   |
| ENSMUSG00000038521 | C1s1     | 7.507E-21 | -2.3063198 | 4.1486511  | down |
| ENSMUSG00000038489 | Polr2l   | 0.0007148 | 0.89585558 | 1.55111202 | up   |
| ENSMUSG00000038415 | Foxq1    | 2.258E-06 | -1.2927975 | 1.94360232 | down |
| ENSMUSG00000038402 | Foxf2    | 9.705E-05 | -1.0436022 | 1.73604322 | down |
| ENSMUSG00000038400 | Pmepa1   | 0.0001502 | 1.04677767 | 1.57606663 | up   |
| ENSMUSG00000038393 | Txnip    | 4.767E-06 | -1.1707332 | 1.96714    | down |
| ENSMUSG00000038371 | Sbf2     | 0.003982  | -0.798451  | 1.50337682 | down |
| ENSMUSG00000038351 | Sgsm2    | 0.0003733 | -0.9353985 | 1.69303613 | down |
| ENSMUSG00000038319 | Kcnh2    | 2.739E-05 | -1.0983273 | 1.84221658 | down |
| ENSMUSG00000038146 | Notch3   | 0.0003244 | -0.993479  | 1.62999026 | down |
| ENSMUSG00000038122 | Tbc1d32  | 8.908E-05 | -1.4047674 | 1.61660079 | down |
| ENSMUSG00000038072 | Galnt11  | 0.000858  | -0.9349985 | 1.56175753 | down |

|                    |           |           |            |            |      |
|--------------------|-----------|-----------|------------|------------|------|
| ENSMUSG00000038070 | Cntln     | 0.0002642 | -1.0643216 | 1.60394218 | down |
| ENSMUSG00000038067 | Csf3      | 3.43E-05  | -7.5501152 | 2.55294118 | down |
| ENSMUSG00000038065 | Mturn     | 0.0001153 | -1.1630829 | 1.64213464 | down |
| ENSMUSG00000038039 | Gcc2      | 0.0008835 | -0.9284878 | 1.5647349  | down |
| ENSMUSG00000037999 | Arap2     | 3.1E-06   | -1.1960769 | 1.98387424 | down |
| ENSMUSG00000037818 | Abhd18    | 1.713E-05 | -1.5122649 | 1.75494071 | down |
| ENSMUSG00000037624 | Kcnk2     | 1.237E-07 | -1.9087087 | 2.1606383  | down |
| ENSMUSG00000037434 | Slc30a1   | 7.27E-05  | 1.26604446 | 1.54615385 | up   |
| ENSMUSG00000037379 | Spon2     | 8.776E-13 | -1.7266298 | 2.91801887 | down |
| ENSMUSG00000037275 | Gemin5    | 0.0014425 | 0.83926769 | 1.5369716  | up   |
| ENSMUSG00000037239 | Spred3    | 0.0003828 | -1.0880712 | 1.55157895 | down |
| ENSMUSG00000037206 | Islr      | 3.43E-05  | -7.5501152 | 2.55294118 | down |
| ENSMUSG00000037012 | Hk1       | 0.0006685 | -0.8735653 | 1.73315415 | down |
| ENSMUSG00000037010 | Apln      | 2.168E-13 | -1.7695929 | 3.00957836 | down |
| ENSMUSG00000036334 | Igsf10    | 6.848E-05 | -1.3367414 | 1.65556901 | down |
| ENSMUSG00000036285 | Noa1      | 0.0003686 | 0.95449606 | 1.56251895 | up   |
| ENSMUSG00000036256 | Igfbp7    | 5.153E-07 | 1.27628542 | 1.96684744 | up   |
| ENSMUSG00000036103 | Colec12   | 4.402E-08 | -1.3500847 | 2.2833018  | down |
| ENSMUSG00000035984 | Nme5      | 2.466E-06 | 4.84464774 | 2.63934426 | up   |
| ENSMUSG00000035783 | Acta2     | 2.038E-05 | 1.05734619 | 1.8779185  | up   |
| ENSMUSG00000035759 | Bbs10     | 2.893E-05 | -2.5232575 | 1.89473684 | down |
| ENSMUSG00000035674 | Ndufa3    | 0.0010235 | 0.88611574 | 1.50439935 | up   |
| ENSMUSG00000035284 | Vps13c    | 7.398E-06 | -1.3019786 | 1.84445885 | down |
| ENSMUSG00000035273 | Hpse      | 0.0006583 | -0.9007709 | 1.65397007 | down |
| ENSMUSG00000035215 | Lsm7      | 0.001564  | 0.84032642 | 1.51617798 | up   |
| ENSMUSG00000035158 | Mitf      | 1.536E-09 | -2.227091  | 2.56387097 | down |
| ENSMUSG00000035109 | Shc4      | 3.66E-05  | -1.0660192 | 1.85015858 | down |
| ENSMUSG00000035105 | Egln3     | 8.91E-17  | -1.983046  | 3.51533963 | down |
| ENSMUSG00000035093 | Secisbp2l | 0.004208  | -0.7858779 | 1.51329973 | down |
| ENSMUSG00000035049 | Rrp12     | 4.325E-05 | 1.08053339 | 1.69572914 | up   |
| ENSMUSG00000035027 | Map2k2    | 0.0016832 | 0.81327351 | 1.59944745 | up   |
| ENSMUSG00000034932 | Mrpl54    | 0.0011495 | 0.85707967 | 1.5401992  | up   |
| ENSMUSG00000034892 | Rps29     | 1.353E-05 | 1.08549617 | 1.86694781 | up   |
| ENSMUSG00000034858 | Fam214a   | 3.051E-07 | -1.667908  | 2.05062413 | down |
| ENSMUSG00000034793 | G6pc3     | 7.319E-36 | -10.72013  | 33.2235294 | down |
| ENSMUSG00000034729 | Mrps10    | 2.038E-05 | 1.0989882  | 1.76811241 | up   |
| ENSMUSG00000034614 | Pik3ip1   | 0.0012301 | -0.9483028 | 1.50457666 | down |
| ENSMUSG00000034522 | Zfp395    | 1.878E-05 | -1.0772507 | 1.93989119 | down |
| ENSMUSG00000034303 | Ccdc15    | 9.976E-08 | -3.6683773 | 3          | down |
| ENSMUSG00000034255 | Arhgap27  | 7.73E-07  | -1.9615007 | 2.04884668 | down |
| ENSMUSG00000033487 | Fndc3a    | 1.047E-08 | -1.4431684 | 2.31982323 | down |
| ENSMUSG00000033420 | Antxr1    | 0.0001965 | -0.975506  | 1.73460591 | down |
| ENSMUSG00000033327 | Tnxb      | 0.0001691 | -1.4878038 | 1.5606383  | down |
| ENSMUSG00000033316 | Galnt9    | 0.000153  | -7.3496356 | 2.12941176 | down |
| ENSMUSG00000033066 | Gas7      | 2.611E-13 | -2.1923687 | 3.07407407 | down |
| ENSMUSG00000033032 | Afap1l1   | 3.872E-06 | -4.8709762 | 2.85217391 | down |
| ENSMUSG00000032892 | Rangrf    | 0.0001345 | 1.02430224 | 1.61452447 | up   |
| ENSMUSG00000032652 | Crebl2    | 9.43E-05  | -1.3349439 | 1.6250808  | down |



|                    |                    |           |            |            |      |
|--------------------|--------------------|-----------|------------|------------|------|
| ENSMUSG00000032625 | Thsd7a             | 0.0003872 | -1.0304938 | 1.57821437 | down |
| ENSMUSG00000032558 | Nphp3              | 8.616E-05 | -1.3192808 | 1.63870581 | down |
| ENSMUSG00000032374 | Plod2              | 4.235E-08 | -1.332077  | 2.31146831 | down |
| ENSMUSG00000032363 | Adamts7            | 4.871E-14 | -1.9050463 | 3.05834549 | down |
| ENSMUSG00000032332 | Col12a1            | 0.0013235 | -0.8293425 | 1.7079934  | down |
| ENSMUSG00000032114 | Slc37a4            | 0.0006412 | -0.9372138 | 1.60064154 | down |
| ENSMUSG00000032064 | Dixdc1             | 3.378E-06 | -1.2271301 | 1.94342813 | down |
| ENSMUSG00000032009 | Sesn3              | 0.0001315 | -0.9984812 | 1.76296067 | down |
| ENSMUSG00000032000 | Birc3              | 0.0003244 | -1.3992903 | 1.50630456 | down |
| ENSMUSG00000031987 | Egln1              | 1.516E-08 | -1.3538781 | 2.42735509 | down |
| ENSMUSG00000031896 | Ctrl               | 9.114E-05 | 7.38239798 | 2.03333333 | up   |
| ENSMUSG00000031722 | Hp                 | 2.027E-15 | -9.1710869 | 9.97647059 | down |
| ENSMUSG00000031647 | Mfap3l             | 0.0002232 | -2.2557172 | 1.60923077 | down |
| ENSMUSG00000031644 | Nek1               | 0.0002642 | -1.069207  | 1.59769167 | down |
| ENSMUSG00000031637 | Lrp2bp             | 1.401E-06 | -1.5181979 | 1.94523549 | down |
| ENSMUSG00000031596 | Slc7a2             | 6.248E-09 | -1.4501945 | 2.36119734 | down |
| ENSMUSG00000031506 | Ptpn7              | 1.949E-05 | 1.81445132 | 1.68960864 | up   |
| ENSMUSG00000031486 | Gpr124             | 0.0048607 | -0.7622768 | 1.53474118 | down |
| ENSMUSG00000031380 | Figf               | 0.0029146 | -0.8216473 | 1.52905368 | down |
| ENSMUSG00000031284 | Pak3               | 0.0009939 | -0.8963428 | 1.59092369 | down |
| ENSMUSG00000031283 | Chrdl1             | 3.162E-08 | -1.3931731 | 2.2597759  | down |
| ENSMUSG00000031278 | Acsl4              | 0.0010311 | -0.8745411 | 1.61854982 | down |
| ENSMUSG00000031274 | Col4a5             | 0.0043488 | -0.7642039 | 1.56236845 | down |
| ENSMUSG00000031099 | Smarca1            | 4.546E-12 | -8.7770149 | 7.24705882 | down |
| ENSMUSG00000031098 | Syt8               | 5.563E-05 | 7.44911909 | 2.15555556 | up   |
| ENSMUSG00000031093 | Dock11             | 3.013E-05 | -1.099233  | 1.82595527 | down |
| ENSMUSG00000031072 | Oraov1             | 0.0002118 | 0.95190058 | 1.66345941 | up   |
| ENSMUSG00000030623 | ENSMUSG00000030623 | 0.0003328 | 0.99845656 | 1.53274478 | up   |
| ENSMUSG00000030616 | Syt12              | 1.951E-09 | -1.5053886 | 2.41869232 | down |
| ENSMUSG00000030603 | Psmc4              | 0.0034389 | 0.77290637 | 1.5203202  | up   |
| ENSMUSG00000030510 | Cers3              | 0.000153  | 7.31244092 | 1.9        | up   |
| ENSMUSG00000030431 | Tmem238            | 4.068E-08 | 1.4323477  | 2.07724645 | up   |
| ENSMUSG00000030401 | Rtn2               | 3.697E-05 | 1.67529085 | 1.6127907  | up   |
| ENSMUSG00000030315 | Vgll4              | 0.0028495 | -0.8179154 | 1.54071393 | down |
| ENSMUSG00000030257 | Srgap3             | 4.989E-07 | -1.264403  | 2.11495431 | down |
| ENSMUSG00000030256 | Bhlhe41            | 7.27E-05  | -1.0795593 | 1.73515093 | down |
| ENSMUSG00000030220 | Arhgdib            | 1.34E-12  | -1.7157372 | 2.88643039 | down |
| ENSMUSG00000030103 | Bhlhe40            | 0.0045158 | -0.7699637 | 1.53238394 | down |
| ENSMUSG00000030029 | Lrig1              | 0.0004756 | -0.8970245 | 1.73821741 | down |
| ENSMUSG00000030022 | Adamts9            | 3.77E-06  | -1.3507855 | 1.87639238 | down |
| ENSMUSG00000029992 | Gfpt1              | 0.0001498 | -0.9954768 | 1.74552549 | down |
| ENSMUSG00000029660 | Tex26              | 0.000643  | -2.5566951 | 1.53781513 | down |
| ENSMUSG00000029657 | Hsph1              | 0.0014143 | 0.83509012 | 1.55567921 | up   |
| ENSMUSG00000029648 | Flt1               | 0.0010573 | -0.9714989 | 1.50308642 | down |
| ENSMUSG00000029641 | Rasl11a            | 5.611E-09 | -1.4721341 | 2.34903464 | down |
| ENSMUSG00000029640 | Usp12              | 0.0049103 | -0.7628524 | 1.52942779 | down |
| ENSMUSG00000029512 | Ulk1               | 0.000758  | -0.8900515 | 1.64775977 | down |
| ENSMUSG00000029470 | P2rx4              | 0.0051256 | -0.7677344 | 1.50947512 | down |

|                    |           |           |            |            |      |
|--------------------|-----------|-----------|------------|------------|------|
| ENSMUSG00000029394 | Cdk2ap1   | 0.0019222 | 0.82439401 | 1.5105383  | up   |
| ENSMUSG00000029385 | Ccng2     | 1.212E-10 | -1.6207561 | 2.57992565 | down |
| ENSMUSG00000029380 | Cxcl1     | 1.632E-05 | -1.0815323 | 1.95712529 | down |
| ENSMUSG00000029372 | Ppbbp     | 5.449E-05 | -1.8938672 | 1.71908127 | down |
| ENSMUSG00000029371 | Cxcl5     | 1.713E-15 | -1.8660086 | 3.33252856 | down |
| ENSMUSG00000029322 | Plac8     | 0.0004358 | -1.1573034 | 1.51835317 | down |
| ENSMUSG00000029309 | Sparcl1   | 1.358E-14 | -3.6943832 | 4.82565789 | down |
| ENSMUSG00000029287 | Tgfbr3    | 0.000444  | -0.9271029 | 1.67549261 | down |
| ENSMUSG00000029231 | Pdgfra    | 2.582E-07 | -1.2992883 | 2.14412395 | down |
| ENSMUSG00000029186 | Pi4k2b    | 9.303E-06 | -1.156843  | 1.90623207 | down |
| ENSMUSG00000029167 | Ppargc1a  | 1.082E-12 | -8.8548443 | 7.72941176 | down |
| ENSMUSG00000029163 | Emilin1   | 3.533E-08 | -1.3437314 | 2.30913453 | down |
| ENSMUSG00000029135 | Fosl2     | 0.0079187 | -0.7146543 | 1.5375115  | down |
| ENSMUSG00000029126 | Nsg1      | 0.0005667 | -0.8891036 | 1.71962291 | down |
| ENSMUSG00000029108 | Pcdh7     | 3.458E-07 | -1.255134  | 2.16777734 | down |
| ENSMUSG00000029005 | Draxin    | 1.346E-07 | -2.6290355 | 2.47164948 | down |
| ENSMUSG00000029004 | Kmt2e     | 7.923E-05 | -1.0317502 | 1.78115088 | down |
| ENSMUSG00000028982 | Slc25a33  | 0.0003244 | 0.9922375  | 1.53756789 | up   |
| ENSMUSG00000028967 | Errfi1    | 0.0009848 | -0.8744747 | 1.63263137 | down |
| ENSMUSG00000028965 | Tnfrsf9   | 2.771E-10 | -1.5086727 | 2.60963608 | down |
| ENSMUSG00000028926 | Cdk14     | 0.0002125 | -0.9758975 | 1.72034115 | down |
| ENSMUSG00000028780 | Sema3c    | 1.061E-16 | -1.9181138 | 3.60513162 | down |
| ENSMUSG00000028645 | Slc2a1    | 1.335E-10 | -1.5181568 | 2.6979569  | down |
| ENSMUSG00000028636 | Ppcs      | 4.253E-06 | 2.43166612 | 1.92802057 | up   |
| ENSMUSG00000028600 | Podn      | 0.0001028 | -1.7583114 | 1.64230171 | down |
| ENSMUSG00000028527 | Ak4       | 1.87E-06  | -1.1968467 | 2.05415162 | down |
| ENSMUSG00000028463 | Car9      | 1.999E-08 | -1.7363456 | 2.24718435 | down |
| ENSMUSG00000028456 | Unc13b    | 0.0001951 | -3.042244  | 1.77604167 | down |
| ENSMUSG00000028412 | Slc44a1   | 0.000175  | -0.9864913 | 1.73577782 | down |
| ENSMUSG00000028318 | Polr1e    | 0.0001484 | 1.04595687 | 1.58667737 | up   |
| ENSMUSG00000028211 | Trp53inp1 | 0.0001957 | -1.4939163 | 1.54424779 | down |
| ENSMUSG00000028100 | Nudt17    | 1.347E-06 | 1.50384815 | 1.81592554 | up   |
| ENSMUSG00000028069 | Gpatch4   | 0.0006484 | 0.90778133 | 1.54797276 | up   |
| ENSMUSG00000028015 | Ctso      | 4.767E-06 | -1.7211684 | 1.85683297 | down |
| ENSMUSG00000027848 | Olfml3    | 3.543E-10 | -1.6902686 | 2.47976879 | down |
| ENSMUSG00000027820 | Mme       | 7.479E-13 | -2.1053878 | 2.970964   | down |
| ENSMUSG00000027805 | Pfn2      | 0.0010889 | -0.9133837 | 1.5524895  | down |
| ENSMUSG00000027797 | Dclk1     | 0.0007937 | -0.8719249 | 1.68826148 | down |
| ENSMUSG00000027778 | Ift80     | 0.0031575 | -0.8229988 | 1.50863086 | down |
| ENSMUSG00000027674 | Pex5l     | 4.451E-13 | -8.9044917 | 8.04705882 | down |
| ENSMUSG00000027405 | Nop56     | 0.0020209 | 0.80339584 | 1.58163025 | up   |
| ENSMUSG00000027368 | Dusp2     | 9.957E-05 | 4.44587336 | 1.86885246 | up   |
| ENSMUSG00000027276 | Jag1      | 3.481E-05 | 1.30801312 | 1.61123906 | up   |
| ENSMUSG00000027239 | Mdk       | 5.932E-09 | -1.4397729 | 2.38099657 | down |
| ENSMUSG00000027207 | Galk2     | 8.908E-05 | -0.9969541 | 1.83394595 | down |
| ENSMUSG00000027175 | Tcp11l1   | 9.954E-07 | -7.9316466 | 3.56470588 | down |
| ENSMUSG00000027171 | Prrg4     | 2.654E-07 | -3.3832774 | 2.73953488 | down |
| ENSMUSG00000026822 | Lcn2      | 8.689E-18 | -2.6910329 | 4.05617978 | down |

|                    |           |           |            |            |      |
|--------------------|-----------|-----------|------------|------------|------|
| ENSMUSG00000026819 | Slc25a25  | 2.01E-05  | 1.16668408 | 1.70189652 | up   |
| ENSMUSG00000026810 | Dpm2      | 1.362E-06 | 1.22639939 | 1.92251151 | up   |
| ENSMUSG00000026785 | Pkn3      | 0.0005803 | -0.931843  | 1.6234338  | down |
| ENSMUSG00000026586 | Prrx1     | 1.615E-07 | -1.265818  | 2.284579   | down |
| ENSMUSG00000026471 | Mr1       | 1.597E-06 | -1.3167121 | 1.96309356 | down |
| ENSMUSG00000026414 | Tnnt2     | 2.697E-06 | 1.53944509 | 1.77965044 | up   |
| ENSMUSG00000026413 | Pkp1      | 0.0002364 | 0.97930304 | 1.59180805 | up   |
| ENSMUSG00000026365 | Cfh       | 0.0003003 | -1.057825  | 1.59280959 | down |
| ENSMUSG00000026271 | Gpr35     | 1.07E-16  | -9.3065173 | 11.1176471 | down |
| ENSMUSG00000026193 | Fn1       | 0.0057101 | -0.7275111 | 1.65819977 | down |
| ENSMUSG00000026069 | Il1rl1    | 2.062E-07 | -1.2774863 | 2.19839899 | down |
| ENSMUSG00000026018 | Ica1l     | 0.0001808 | -1.7750408 | 1.59145299 | down |
| ENSMUSG00000025986 | Slc39a10  | 0.0008354 | -0.9311575 | 1.57181613 | down |
| ENSMUSG00000025969 | Nrp2      | 0.0010771 | -0.8518568 | 1.67187275 | down |
| ENSMUSG00000025911 | Adhfe1    | 7.836E-06 | -2.1895261 | 1.95940171 | down |
| ENSMUSG00000025888 | Casp1     | 0.0010634 | -3.4801442 | 1.52816901 | down |
| ENSMUSG00000025791 | Pgm2      | 5.555E-05 | -1.008476  | 1.91707571 | down |
| ENSMUSG00000025732 | Fam195a   | 2.317E-05 | 1.12001027 | 1.7262124  | up   |
| ENSMUSG00000025532 | Crcp      | 0.0007289 | 0.90890578 | 1.52539405 | up   |
| ENSMUSG00000025473 | Adam8     | 3.454E-07 | 1.47473409 | 1.91454545 | up   |
| ENSMUSG00000025362 | Rps26     | 0.0087555 | 0.69732084 | 1.50897338 | up   |
| ENSMUSG00000025347 | Mettl7b   | 1.586E-06 | -2.4752553 | 2.18556701 | down |
| ENSMUSG00000025283 | Sat1      | 9.353E-05 | -0.9888267 | 1.84755159 | down |
| ENSMUSG00000025227 | Tmem180   | 1.237E-07 | -2.0934942 | 2.21857143 | down |
| ENSMUSG00000025161 | Slc16a3   | 6.859E-12 | -2.089564  | 2.83073798 | down |
| ENSMUSG00000025025 | Mxi1      | 0.000175  | -0.9827863 | 1.74019414 | down |
| ENSMUSG00000025006 | Sorbs1    | 4.992E-10 | -3.5947305 | 3.62184874 | down |
| ENSMUSG00000024978 | Gpam      | 0.003075  | -0.8178913 | 1.52576563 | down |
| ENSMUSG00000024924 | Vldlr     | 8.989E-08 | -1.3754508 | 2.18086932 | down |
| ENSMUSG00000024913 | Lrp5      | 1.223E-11 | -1.6691469 | 2.74014229 | down |
| ENSMUSG00000024810 | Il33      | 7.756E-25 | -2.9801861 | 5.38300936 | down |
| ENSMUSG00000024803 | Ankrd1    | 0.0001664 | 0.97349389 | 1.65897466 | up   |
| ENSMUSG00000024529 | Lox       | 1.669E-18 | -2.0230554 | 3.90732532 | down |
| ENSMUSG00000024395 | Lims2     | 1.347E-06 | -2.3875056 | 2.17523364 | down |
| ENSMUSG00000024164 | C3        | 9.589E-26 | -2.4339817 | 5.03301796 | down |
| ENSMUSG00000024066 | Xdh       | 3.732E-05 | -1.0288089 | 1.94558802 | down |
| ENSMUSG00000023992 | Trem2     | 8.946E-12 | -3.7995178 | 4.2605042  | down |
| ENSMUSG00000023988 | Bysl      | 7.315E-05 | 1.00571103 | 1.74038575 | up   |
| ENSMUSG00000023951 | Vegfa     | 7.805E-06 | -1.1262243 | 1.97666403 | down |
| ENSMUSG00000023915 | Tnfrsf21  | 2.038E-05 | 1.45703812 | 1.63426241 | up   |
| ENSMUSG00000023911 | Flywch2   | 0.0009939 | -4.1962251 | 1.57391304 | down |
| ENSMUSG00000023905 | Tnfrsf12a | 2.26E-05  | 1.05384553 | 1.85713086 | up   |
| ENSMUSG00000023885 | Thbs2     | 2.98E-11  | -1.7456136 | 2.64539559 | down |
| ENSMUSG00000023456 | Tpi1      | 0.0006365 | -0.866047  | 1.82324549 | down |
| ENSMUSG00000023067 | Cdkn1a    | 9.658E-16 | -2.0547186 | 3.32572718 | down |
| ENSMUSG00000022995 | Enah      | 0.0056404 | -0.7455974 | 1.54239229 | down |
| ENSMUSG00000022912 | Pros1     | 5.399E-28 | -10.22949  | 22.8588235 | down |
| ENSMUSG00000022887 | Masp1     | 1.79E-05  | -1.0830396 | 1.9320437  | down |

|                    |                    |           |            |            |      |
|--------------------|--------------------|-----------|------------|------------|------|
| ENSMUSG00000022849 | Hspbap1            | 3.138E-05 | 1.20700354 | 1.64384724 | up   |
| ENSMUSG00000022802 | Lmln               | 0.0001545 | -1.3824719 | 1.56895128 | down |
| ENSMUSG00000022788 | Fgd4               | 2.495E-06 | -4.16312   | 2.76056338 | down |
| ENSMUSG00000022754 | Tmem45a            | 2.567E-10 | -1.5110659 | 2.61544323 | down |
| ENSMUSG00000022707 | Gbe1               | 6.941E-11 | -1.6926418 | 2.60212436 | down |
| ENSMUSG00000022639 | ENSMUSG00000022639 | 9.482E-06 | -1.2449468 | 1.83987761 | down |
| ENSMUSG00000022554 | Fam203a            | 0.0006413 | 0.90816465 | 1.54462151 | up   |
| ENSMUSG00000022528 | Hes1               | 2.316E-09 | 1.6985614  | 2.22609718 | up   |
| ENSMUSG00000022489 | Pde1b              | 2.62E-07  | -2.0705998 | 2.15418502 | down |
| ENSMUSG00000022367 | Has2               | 4.461E-10 | -1.6593685 | 2.46787747 | down |
| ENSMUSG00000022325 | Pop1               | 2.097E-06 | 1.24981931 | 1.85674074 | up   |
| ENSMUSG00000022321 | Cdh10              | 2.085E-05 | 7.57396181 | 2.41111111 | up   |
| ENSMUSG00000022280 | Rnf19a             | 0.0014649 | -0.8719751 | 1.56234535 | down |
| ENSMUSG00000022150 | Dab2               | 0.0066953 | -0.737459  | 1.51499304 | down |
| ENSMUSG00000022146 | Osmr               | 0.0013436 | -0.8660521 | 1.58662242 | down |
| ENSMUSG00000022139 | Mbnl2              | 0.006345  | -0.7433891 | 1.51180812 | down |
| ENSMUSG00000022123 | Scel               | 0.0003053 | -3.2569284 | 1.72619048 | down |
| ENSMUSG00000022051 | Bnip3l             | 8.094E-06 | -1.1075456 | 2.02632873 | down |
| ENSMUSG00000021994 | Wnt5a              | 1.754E-05 | -1.1548182 | 1.83327938 | down |
| ENSMUSG00000021876 | Rnase4             | 1.879E-37 | -10.807543 | 35.4823529 | down |
| ENSMUSG00000021831 | Ero1l              | 4.368E-23 | -2.2966059 | 4.57081997 | down |
| ENSMUSG00000021798 | Ldb3               | 6.207E-05 | 2.52925625 | 1.69       | up   |
| ENSMUSG00000021756 | Il6st              | 0.0050606 | -0.7487701 | 1.57018221 | down |
| ENSMUSG00000021754 | Map3k1             | 0.0005628 | -1.0721222 | 1.51313814 | down |
| ENSMUSG00000021728 | Emb                | 0.0005316 | -0.9275102 | 1.64553232 | down |
| ENSMUSG00000021703 | Serinc5            | 7.909E-06 | -1.427772  | 1.8220293  | down |
| ENSMUSG00000021591 | Glrx               | 0.000175  | -1.0023522 | 1.70961969 | down |
| ENSMUSG00000021466 | Ptch1              | 2.933E-06 | -1.2940339 | 1.91604755 | down |
| ENSMUSG00000021367 | Edn1               | 1.203E-05 | 3.53384754 | 2.08426966 | up   |
| ENSMUSG00000021238 | Aldh6a1            | 0.0002589 | -1.1162915 | 1.58096591 | down |
| ENSMUSG00000021196 | Pfkip              | 5.001E-05 | -1.0197498 | 1.89918898 | down |
| ENSMUSG00000021127 | Zfp36l1            | 0.0038875 | -0.7918186 | 1.52473182 | down |
| ENSMUSG00000021109 | Hif1a              | 1.581E-05 | -1.0802996 | 1.97054978 | down |
| ENSMUSG00000021108 | Prkch              | 7.836E-06 | -7.7261045 | 2.97647059 | down |
| ENSMUSG00000021091 | Serpina3n          | 3.751E-16 | -9.250025  | 10.6235294 | down |
| ENSMUSG00000021070 | Bdkrb2             | 3.188E-05 | -1.2545634 | 1.72675086 | down |
| ENSMUSG00000020902 | Ntn1               | 1.071E-06 | -1.208232  | 2.10575966 | down |
| ENSMUSG00000020901 | Pik3r5             | 2.627E-07 | -1.4803627 | 2.05374351 | down |
| ENSMUSG00000020876 | Snx11              | 0.0004358 | 0.97223438 | 1.51764706 | up   |
| ENSMUSG00000020828 | Pld2               | 7.756E-25 | -3.2186615 | 5.78085106 | down |
| ENSMUSG00000020826 | Nos2               | 5.23E-49  | -3.8270296 | 11.1802526 | down |
| ENSMUSG00000020695 | Mrc2               | 0.0031989 | -0.7736251 | 1.65044888 | down |
| ENSMUSG00000020684 | Rasl10b            | 0.0006244 | -4.2661931 | 1.67826087 | down |
| ENSMUSG00000020601 | Trib2              | 3.543E-10 | -1.6721269 | 2.48266297 | down |
| ENSMUSG00000020572 | Nampt              | 0.0021295 | -0.8210653 | 1.59139484 | down |
| ENSMUSG00000020514 | Mrpl22             | 6.413E-05 | 1.02532679 | 1.71555664 | up   |
| ENSMUSG00000020375 | Rufy1              | 6.075E-05 | 1.06353212 | 1.66759227 | up   |
| ENSMUSG00000020363 | Gfpt2              | 0.0004413 | -2.3766583 | 1.57446809 | down |

|                    |          |           |            |            |      |
|--------------------|----------|-----------|------------|------------|------|
| ENSMUSG00000020312 | Shc2     | 0.0008819 | -0.9737561 | 1.52402474 | down |
| ENSMUSG00000020277 | Pfkl     | 5.177E-05 | -1.0067056 | 1.95876795 | down |
| ENSMUSG00000020123 | Avpr1a   | 4.727E-08 | -3.3321896 | 2.92857143 | down |
| ENSMUSG00000020108 | Ddit4    | 0.0003394 | -0.9338572 | 1.71177056 | down |
| ENSMUSG00000019997 | Ctgf     | 7.591E-13 | 1.79683152 | 2.71053529 | up   |
| ENSMUSG00000019947 | Arid5b   | 0.0003394 | -0.9504461 | 1.68143024 | down |
| ENSMUSG00000019944 | Rhobtb1  | 0.0002741 | -1.1384139 | 1.5668147  | down |
| ENSMUSG00000019916 | P4ha1    | 0.0001545 | -0.9549904 | 1.85057876 | down |
| ENSMUSG00000019880 | Rspo3    | 3.996E-05 | -1.1655004 | 1.74047141 | down |
| ENSMUSG00000019359 | Gdpd2    | 8.776E-13 | -3.1492781 | 3.84313725 | down |
| ENSMUSG00000019189 | Rnf145   | 0.0076018 | -0.7286214 | 1.50115265 | down |
| ENSMUSG00000019102 | Aldh3a1  | 4.444E-07 | -1.459294  | 2.01726727 | down |
| ENSMUSG00000018906 | P4ha2    | 0.0078965 | -0.7121471 | 1.55280714 | down |
| ENSMUSG00000018740 | Slc25a35 | 5.759E-05 | 1.0617446  | 1.67947217 | up   |
| ENSMUSG00000018585 | Atox1    | 0.0045158 | 0.75217212 | 1.50748455 | up   |
| ENSMUSG00000018509 | Cenpv    | 4.591E-09 | 1.48913094 | 2.21600799 | up   |
| ENSMUSG00000018427 | Ypel2    | 0.0002146 | -1.1751881 | 1.5707804  | down |
| ENSMUSG00000018411 | Mapt     | 8.022E-05 | 1.75665602 | 1.53101362 | up   |
| ENSMUSG00000017737 | Mmp9     | 1.697E-07 | -4.3792622 | 3.30985915 | down |
| ENSMUSG00000017607 | Tns4     | 0.0009037 | -2.8565719 | 1.51041667 | down |
| ENSMUSG00000017446 | C1qtnf1  | 3.378E-06 | -1.3048056 | 1.8957927  | down |
| ENSMUSG00000017400 | Stac2    | 4.79E-64  | -9.0281264 | 72.6173913 | down |
| ENSMUSG00000017314 | Mpp2     | 1.621E-08 | -1.4864435 | 2.25355099 | down |
| ENSMUSG00000017167 | Cntnap1  | 1.024E-07 | -1.4493348 | 2.12872841 | down |
| ENSMUSG00000017057 | Il13ra1  | 9.175E-05 | -1.0132151 | 1.79391964 | down |
| ENSMUSG00000017002 | Slpi     | 7.922E-15 | -1.8747401 | 3.2081055  | down |
| ENSMUSG00000016552 | Foxred2  | 1.645E-08 | -1.479225  | 2.25391658 | down |
| ENSMUSG00000016458 | Wt1      | 8.061E-08 | -1.4167083 | 2.16128393 | down |
| ENSMUSG00000016024 | Lbp      | 8.6E-05   | -1.1663462 | 1.66699251 | down |
| ENSMUSG00000015766 | Eps8     | 0.0006413 | -0.8858099 | 1.69696585 | down |
| ENSMUSG00000015653 | Steap2   | 0.0069827 | -0.7239961 | 1.5541429  | down |
| ENSMUSG00000015605 | Srf      | 0.0003797 | 0.91893252 | 1.62467227 | up   |
| ENSMUSG00000015568 | Lpl      | 4.199E-05 | -1.0757965 | 1.81228814 | down |
| ENSMUSG00000015501 | Hivep2   | 2.837E-05 | -1.180178  | 1.77034184 | down |
| ENSMUSG00000015354 | Pcolce2  | 0.0010806 | 0.87788465 | 1.50793261 | up   |
| ENSMUSG00000015243 | Abca1    | 4.272E-18 | -2.3630854 | 3.78577858 | down |
| ENSMUSG00000015176 | Nolc1    | 0.00431   | 0.75576344 | 1.50908661 | up   |
| ENSMUSG00000014905 | Dnajb9   | 0.0004264 | -1.1164804 | 1.52544529 | down |
| ENSMUSG00000013846 | St3gal1  | 1.581E-05 | -1.1311337 | 1.87252221 | down |
| ENSMUSG00000013663 | Pten     | 6.055E-05 | -1.0192646 | 1.85282268 | down |
| ENSMUSG00000012848 | Rps5     | 0.0056118 | 0.72983985 | 1.54417607 | up   |
| ENSMUSG00000012777 | Acpt     | 5.105E-05 | 1.3294784  | 1.57072368 | up   |
| ENSMUSG00000012428 | Steap4   | 2.333E-33 | -7.5173614 | 23.6521739 | down |
| ENSMUSG00000011752 | Pgam1    | 0.0019372 | -0.8019793 | 1.71759607 | down |
| ENSMUSG00000009563 | Tor2a    | 3.837E-05 | 1.06366548 | 1.73402967 | up   |
| ENSMUSG00000009185 | Ccl8     | 1.283E-07 | -2.0012215 | 2.17654477 | down |
| ENSMUSG00000008540 | Mgst1    | 1.712E-07 | -1.3246347 | 2.15965279 | down |
| ENSMUSG00000007888 | Crif1    | 3.699E-06 | 1.17505031 | 1.87721298 | up   |

|                    |         |           |            |            |      |
|--------------------|---------|-----------|------------|------------|------|
| ENSMUSG00000007817 | Zmiz1   | 0.0018188 | -0.822718  | 1.62731192 | down |
| ENSMUSG00000007033 | Hspa1l  | 3.945E-06 | 1.77197872 | 1.79744136 | up   |
| ENSMUSG00000006494 | Pdk1    | 6.576E-18 | -2.0432096 | 3.69386412 | down |
| ENSMUSG00000006403 | Adamts4 | 1.547E-09 | -1.9258793 | 2.44863267 | down |
| ENSMUSG00000006335 | Tfpt    | 1.365E-05 | 1.16044763 | 1.74672991 | up   |
| ENSMUSG00000005800 | Mmp8    | 9.954E-07 | -2.7001246 | 2.31384615 | down |
| ENSMUSG00000005686 | Ampd3   | 3.265E-10 | -1.5657523 | 2.53377016 | down |
| ENSMUSG00000005534 | Insr    | 0.0012664 | -0.9090988 | 1.53648821 | down |
| ENSMUSG00000005374 | Tbl2    | 0.0001573 | -0.9765045 | 1.76784847 | down |
| ENSMUSG00000005125 | Ndrp1   | 1.545E-20 | -2.1400389 | 4.20896621 | down |
| ENSMUSG00000004933 | Matk    | 0.000112  | 1.9146832  | 1.52611219 | up   |
| ENSMUSG00000004655 | Aqp1    | 2.806E-22 | -2.7283009 | 4.69802555 | down |
| ENSMUSG00000004558 | Ndrp2   | 3.206E-09 | -2.019456  | 2.43619048 | down |
| ENSMUSG00000004319 | Clcn3   | 5.35E-05  | -1.0567025 | 1.80717784 | down |
| ENSMUSG00000004267 | Eno2    | 6.248E-09 | -1.4270172 | 2.38880484 | down |
| ENSMUSG00000003955 | Fam162a | 1.193E-05 | -1.084674  | 2.02850949 | down |
| ENSMUSG00000003873 | Bax     | 1.146E-05 | 1.10310826 | 1.84929142 | up   |
| ENSMUSG00000003865 | Gys1    | 0.0027035 | -0.7908152 | 1.63087837 | down |
| ENSMUSG00000003721 | Insig2  | 0.0004573 | -0.9147269 | 1.69090465 | down |
| ENSMUSG00000003617 | Cp      | 1.706E-15 | -1.8422317 | 3.42543998 | down |
| ENSMUSG00000003541 | Irf3    | 1.567E-05 | -1.0793897 | 1.97676425 | down |
| ENSMUSG00000003355 | Fkbp11  | 2.219E-15 | -3.3680826 | 4.54901961 | down |
| ENSMUSG00000003031 | Cdkn1b  | 0.0033233 | -0.8025456 | 1.53610945 | down |
| ENSMUSG00000002984 | Tomm40  | 0.0020828 | 0.80669857 | 1.55160938 | up   |
| ENSMUSG00000002409 | Dyrk1b  | 3.872E-05 | -1.2299747 | 1.72017045 | down |
| ENSMUSG00000002107 | Celf2   | 0.0003949 | -0.9602394 | 1.64515738 | down |
| ENSMUSG00000001768 | Rin2    | 3.123E-06 | -1.2317506 | 1.94662088 | down |
| ENSMUSG00000001751 | Naglu   | 0.0007375 | -0.9017382 | 1.63341165 | down |
| ENSMUSG00000001542 | Eif2    | 0.0003121 | -1.086334  | 1.58173831 | down |
| ENSMUSG00000001156 | Mxd1    | 0.0003355 | -1.1330238 | 1.54452926 | down |
| ENSMUSG00000001056 | Nhp2    | 0.0016832 | 0.81899811 | 1.56645739 | up   |
| ENSMUSG00000000690 | Hoxb6   | 2.181E-07 | 1.64140528 | 1.94391408 | up   |
| ENSMUSG00000000628 | Hk2     | 0.0001004 | -1.0161046 | 1.77555739 | down |
| ENSMUSG00000000489 | Pdgfrb  | 1.294E-05 | 1.2077314  | 1.72708548 | up   |

## S2\_Compared with mouse brain proteome at 9 days after birth

| #ID                | preferredName | FDR         | log2FC       | regulated |
|--------------------|---------------|-------------|--------------|-----------|
| ENSMUSG00000078812 | Eif5a         | 0.002465404 | 0.785727733  | up        |
| ENSMUSG00000071658 | Gng3          | 8.97E-05    | 3.053238863  | up        |
| ENSMUSG00000067629 | Syngap1       | 3.07E-05    | -1.247757824 | down      |
| ENSMUSG00000063229 | Ldha          | 0.001338216 | -0.821725056 | down      |
| ENSMUSG00000062380 | Tubb3         | 4.00E-05    | 1.089360032  | up        |
| ENSMUSG00000062070 | Pgk1          | 7.27E-05    | -0.984571101 | down      |
| ENSMUSG00000060961 | Slc4a4        | 1.25E-07    | -1.631462097 | down      |
| ENSMUSG00000059456 | Ptk2b         | 2.74E-06    | -7.83253293  | down      |
| ENSMUSG00000058420 | Syt17         | 1.74E-06    | -1.380660381 | down      |
| ENSMUSG00000057666 | Gapdh         | 0.002800884 | -0.784715839 | down      |
| ENSMUSG00000057193 | Slc44a2       | 0.007781326 | -0.71895963  | down      |
| ENSMUSG00000055782 | Abcd2         | 1.55E-09    | -2.473152044 | down      |
| ENSMUSG00000054793 | Cadm4         | 6.73E-05    | 1.342584155  | up        |
| ENSMUSG00000053702 | Neb1          | 7.43E-06    | 1.858746262  | up        |
| ENSMUSG00000050965 | Prkca         | 0.000183553 | -0.986622721 | down      |
| ENSMUSG00000050953 | Gja1          | 7.14E-05    | -1.008720065 | down      |
| ENSMUSG00000045092 | S1pr1         | 1.06E-05    | -1.388749723 | down      |
| ENSMUSG00000043991 | Pura          | 2.81E-22    | -2.836144751 | down      |
| ENSMUSG00000041757 | Plekha6       | 0.000129248 | -1.435663953 | down      |
| ENSMUSG00000041642 | Kif21b        | 0.006388234 | -0.736533789 | down      |
| ENSMUSG00000040675 | Mthfd1l       | 0.006258581 | -0.733361159 | down      |
| ENSMUSG00000040249 | Lrp1          | 0.006012088 | -0.728224954 | down      |
| ENSMUSG00000039704 | Lmbrd2        | 0.000129248 | -1.047285741 | down      |
| ENSMUSG00000039474 | Wfs1          | 8.62E-05    | -1.017260216 | down      |
| ENSMUSG00000038587 | Akap12        | 1.18E-06    | 1.311067129  | up        |
| ENSMUSG00000037434 | Slc30a1       | 7.27E-05    | 1.266044465  | up        |
| ENSMUSG00000037012 | Hk1           | 0.000668538 | -0.873565288 | down      |
| ENSMUSG00000035674 | Ndufa3        | 0.00102346  | 0.886115743  | up        |
| ENSMUSG00000033066 | Gas7          | 2.61E-13    | -2.192368736 | down      |
| ENSMUSG00000032625 | Thsd7a        | 0.000387198 | -1.030493802 | down      |
| ENSMUSG00000030603 | Psmc4         | 0.003438938 | 0.772906375  | up        |
| ENSMUSG00000030257 | Srgap3        | 4.99E-07    | -1.264403032 | down      |
| ENSMUSG00000029657 | Hsph1         | 0.0014143   | 0.835090121  | up        |
| ENSMUSG00000029309 | Sparcl1       | 1.36E-14    | -3.694383242 | down      |
| ENSMUSG00000029126 | Nsg1          | 0.000566745 | -0.889103578 | down      |
| ENSMUSG00000028645 | Slc2a1        | 1.33E-10    | -1.518156759 | down      |
| ENSMUSG00000028527 | Ak4           | 1.87E-06    | -1.19684666  | down      |
| ENSMUSG00000027805 | Pfn2          | 0.001088938 | -0.913383676 | down      |
| ENSMUSG00000027797 | Dclk1         | 0.000793653 | -0.871924886 | down      |
| ENSMUSG00000027674 | Pex5l         | 4.45E-13    | -8.90449172  | down      |
| ENSMUSG00000026819 | Slc25a25      | 2.01E-05    | 1.166684084  | up        |
| ENSMUSG00000025986 | Slc39a10      | 0.000835358 | -0.93115745  | down      |
| ENSMUSG00000025006 | Sorbs1        | 4.99E-10    | -3.594730482 | down      |
| ENSMUSG00000023456 | Tpi1          | 0.000636521 | -0.866046976 | down      |
| ENSMUSG00000022995 | Enah          | 0.005640374 | -0.745597391 | down      |
| ENSMUSG00000022489 | Pde1b         | 2.62E-07    | -2.070599758 | down      |

|                    |         |             |              |      |
|--------------------|---------|-------------|--------------|------|
| ENSMUSG00000022321 | Cdh10   | 2.08E-05    | 7.573961813  | up   |
| ENSMUSG00000021238 | Aldh6a1 | 0.000258937 | -1.116291497 | down |
| ENSMUSG00000021196 | Pfkl    | 5.00E-05    | -1.019749826 | down |
| ENSMUSG00000020277 | Pfkl    | 5.18E-05    | -1.006705583 | down |
| ENSMUSG00000018411 | Mapt    | 8.02E-05    | 1.756656016  | up   |
| ENSMUSG00000017314 | Mpp2    | 1.62E-08    | -1.486443482 | down |
| ENSMUSG00000017167 | Cntnap1 | 1.02E-07    | -1.449334804 | down |
| ENSMUSG00000011752 | Pgam1   | 0.001937196 | -0.801979285 | down |
| ENSMUSG00000006494 | Pdk1    | 6.58E-18    | -2.043209637 | down |
| ENSMUSG00000005534 | Insr    | 0.001266429 | -0.909098754 | down |
| ENSMUSG00000004933 | Matk    | 0.000111965 | 1.914683198  | up   |
| ENSMUSG00000004558 | Ndrp2   | 3.21E-09    | -2.019455981 | down |
| ENSMUSG00000004319 | Clcn3   | 5.35E-05    | -1.056702486 | down |
| ENSMUSG00000004267 | Eno2    | 6.25E-09    | -1.427017178 | down |
| ENSMUSG00000002984 | Tomm40  | 0.002082753 | 0.806698573  | up   |
| ENSMUSG00000002107 | Celf2   | 0.000394922 | -0.960239442 | down |



| S3_peaks |          |          |        |            |        |                |
|----------|----------|----------|--------|------------|--------|----------------|
| chr      | start    | end      | length | abs_summit | pileup | -LOG10(pvalue) |
| 1        | 5562098  | 5562403  | 306    | 5562151    | 7      | 4.65491        |
| 1        | 6789646  | 6789977  | 332    | 6789787    | 7      | 5.30623        |
| 1        | 7278301  | 7278639  | 339    | 7278431    | 8      | 5.56774        |
| 1        | 7623340  | 7623677  | 338    | 7623450    | 8      | 6.50668        |
| 1        | 8806804  | 8807137  | 334    | 8806919    | 5      | 3.5422         |
| 1        | 9220143  | 9220558  | 416    | 9220267    | 7      | 5.47978        |
| 1        | 9286977  | 9287302  | 326    | 9287179    | 8      | 5.39858        |
| 1        | 11354061 | 11354378 | 318    | 11354237   | 5      | 3.4561         |
| 1        | 14811116 | 14811560 | 445    | 14811377   | 7      | 5.13754        |
| 1        | 15331177 | 15331491 | 315    | 15331341   | 7      | 5.47978        |
| 1        | 15549407 | 15549764 | 358    | 15549750   | 6      | 4.50291        |
| 1        | 15574513 | 15574826 | 314    | 15574763   | 5      | 3.58241        |
| 1        | 17250808 | 17251153 | 346    | 17251116   | 5      | 3.58241        |
| 1        | 19846210 | 19846573 | 364    | 19846386   | 6      | 3.8181         |
| 1        | 23809992 | 23810331 | 340    | 23810136   | 7      | 5.47978        |
| 1        | 28601824 | 28602281 | 458    | 28601929   | 6      | 3.66421        |
| 1        | 28641549 | 28642143 | 595    | 28641832   | 7      | 3.45771        |
| 1        | 28940196 | 28940496 | 301    | 28940365   | 6      | 4.40359        |
| 1        | 30363117 | 30363496 | 380    | 30363331   | 6      | 4.50291        |
| 1        | 30489967 | 30490459 | 493    | 30490197   | 5      | 3.58241        |
| 1        | 32682379 | 32682727 | 349    | 32682481   | 8      | 6.50668        |
| 1        | 40676211 | 40676547 | 337    | 40676215   | 5      | 3.58241        |
| 1        | 46953494 | 46953898 | 405    | 46953499   | 6      | 3.79171        |
| 1        | 47110085 | 47110436 | 352    | 47110411   | 6      | 3.79171        |
| 1        | 47647089 | 47647429 | 341    | 47647316   | 6      | 4.50291        |
| 1        | 47931683 | 47932260 | 578    | 47931916   | 7      | 5.47978        |
| 1        | 49023762 | 49024088 | 327    | 49023901   | 6      | 4.50291        |
| 1        | 49312374 | 49312727 | 354    | 49312529   | 7      | 5.47978        |
| 1        | 50807658 | 50808139 | 482    | 50808048   | 6      | 3.66421        |
| 1        | 51996794 | 51997112 | 319    | 51996900   | 7      | 4.87731        |
| 1        | 54301815 | 54302123 | 309    | 54301999   | 6      | 3.98315        |
| 1        | 54729097 | 54729429 | 333    | 54729427   | 8      | 3.3645         |
| 1        | 55238636 | 55238940 | 305    | 55238839   | 8      | 4.94122        |
| 1        | 56060737 | 56061055 | 319    | 56060906   | 6      | 4.50291        |
| 1        | 57864455 | 57864788 | 334    | 57864567   | 7      | 5.47978        |
| 1        | 68310542 | 68310929 | 388    | 68310546   | 6      | 4.50291        |
| 1        | 68649985 | 68650325 | 341    | 68650162   | 5      | 3.07446        |
| 1        | 70236462 | 70236796 | 335    | 70236640   | 8      | 6.50668        |
| 1        | 71100622 | 71100925 | 304    | 71100705   | 10     | 5.80609        |
| 1        | 71252000 | 71252344 | 345    | 71252320   | 9      | 6.52524        |
| 1        | 73553394 | 73553738 | 345    | 73553638   | 7      | 3.45771        |
| 1        | 73760124 | 73760470 | 347    | 73760285   | 7      | 5.47978        |
| 1        | 77641738 | 77642082 | 345    | 77641751   | 6      | 4.50291        |
| 1        | 77911065 | 77911523 | 459    | 77911134   | 7      | 3.45771        |
| 1        | 78987666 | 78988007 | 342    | 78987837   | 8      | 6.50668        |
| 1        | 79041098 | 79041521 | 424    | 79041241   | 7      | 5.47978        |

|   |           |           |     |           |    |         |
|---|-----------|-----------|-----|-----------|----|---------|
| 1 | 81168862  | 81169234  | 373 | 81169067  | 6  | 4.50291 |
| 1 | 83284943  | 83285282  | 340 | 83285121  | 8  | 5.56774 |
| 1 | 83820711  | 83821339  | 629 | 83821205  | 7  | 4.97847 |
| 1 | 85095391  | 85095768  | 378 | 85095583  | 8  | 5.02727 |
| 1 | 85317363  | 85318242  | 880 | 85317871  | 11 | 3.12903 |
| 1 | 88213568  | 88213916  | 349 | 88213587  | 6  | 3.79171 |
| 1 | 92098519  | 92098818  | 300 | 92098712  | 7  | 4.65491 |
| 1 | 93278757  | 93279079  | 323 | 93278940  | 6  | 4.50291 |
| 1 | 93885875  | 93886175  | 301 | 93885885  | 7  | 3.45771 |
| 1 | 94303728  | 94304097  | 370 | 94303884  | 8  | 4.19779 |
| 1 | 94569676  | 94569982  | 307 | 94569719  | 7  | 5.47978 |
| 1 | 94946891  | 94947217  | 327 | 94947073  | 8  | 5.56774 |
| 1 | 95830730  | 95831045  | 316 | 95830901  | 9  | 7.57852 |
| 1 | 95887271  | 95887615  | 345 | 95887494  | 5  | 3.58241 |
| 1 | 96842092  | 96842463  | 372 | 96842198  | 8  | 5.56774 |
| 1 | 99187245  | 99187547  | 303 | 99187500  | 8  | 5.3496  |
| 1 | 99211338  | 99211670  | 333 | 99211540  | 6  | 4.50291 |
| 1 | 100461890 | 100462380 | 491 | 100462098 | 7  | 4.87731 |
| 1 | 100598187 | 100598560 | 374 | 100598299 | 7  | 4.65491 |
| 1 | 103297781 | 103298134 | 354 | 103298089 | 6  | 4.50291 |
| 1 | 103819828 | 103820154 | 327 | 103819998 | 6  | 4.50291 |
| 1 | 105642636 | 105642940 | 305 | 105642837 | 8  | 5.93643 |
| 1 | 106259850 | 106260152 | 303 | 106260125 | 6  | 4.40359 |
| 1 | 107108328 | 107108668 | 341 | 107108342 | 7  | 4.50662 |
| 1 | 108790491 | 108790861 | 371 | 108790711 | 8  | 5.56774 |
| 1 | 109453606 | 109453918 | 313 | 109453701 | 7  | 3.76048 |
| 1 | 109491023 | 109491400 | 378 | 109491082 | 8  | 4.19779 |
| 1 | 109638114 | 109638431 | 318 | 109638339 | 6  | 4.50291 |
| 1 | 109944462 | 109944931 | 470 | 109944616 | 8  | 4.19779 |
| 1 | 110674239 | 110674589 | 351 | 110674501 | 7  | 5.47978 |
| 1 | 110765877 | 110766180 | 304 | 110766084 | 7  | 4.50662 |
| 1 | 111493476 | 111493848 | 373 | 111493588 | 6  | 4.40359 |
| 1 | 112213063 | 112213392 | 330 | 112213073 | 5  | 3.58241 |
| 1 | 112988328 | 112988646 | 319 | 112988399 | 6  | 4.50291 |
| 1 | 114696527 | 114696861 | 335 | 114696636 | 5  | 3.58241 |
| 1 | 114863947 | 114864263 | 317 | 114863965 | 6  | 4.50291 |
| 1 | 115290203 | 115290547 | 345 | 115290434 | 8  | 6.50668 |
| 1 | 115452208 | 115452577 | 370 | 115452370 | 9  | 7.50822 |
| 1 | 116115537 | 116115990 | 454 | 116115583 | 6  | 4.25501 |
| 1 | 118123578 | 118123942 | 365 | 118123795 | 6  | 4.50291 |
| 1 | 118848983 | 118849282 | 300 | 118849262 | 6  | 4.50291 |
| 1 | 121967447 | 121967771 | 325 | 121967519 | 7  | 4.50662 |
| 1 | 123261120 | 123261543 | 424 | 123261455 | 6  | 4.50291 |
| 1 | 123668020 | 123668424 | 405 | 123668067 | 10 | 7.52331 |
| 1 | 123773366 | 123773667 | 302 | 123773644 | 9  | 3.94891 |
| 1 | 123793158 | 123793807 | 650 | 123793767 | 6  | 3.79171 |
| 1 | 124006716 | 124007037 | 322 | 124006762 | 5  | 3.58241 |
| 1 | 125844566 | 125844875 | 310 | 125844766 | 5  | 3.58241 |

|   |           |           |     |           |   |         |
|---|-----------|-----------|-----|-----------|---|---------|
| 1 | 127763759 | 127764074 | 316 | 127763905 | 6 | 4.07032 |
| 1 | 128067835 | 128068135 | 301 | 128067862 | 5 | 3.58241 |
| 1 | 129947200 | 129947529 | 330 | 129947468 | 8 | 5.49896 |
| 1 | 130793866 | 130794235 | 370 | 130794072 | 8 | 4.19779 |
| 1 | 133530353 | 133530657 | 305 | 133530512 | 6 | 4.50291 |
| 1 | 134690149 | 134690465 | 317 | 134690297 | 5 | 3.58241 |
| 1 | 138903598 | 138903913 | 316 | 138903688 | 6 | 3.85827 |
| 1 | 140752664 | 140752969 | 306 | 140752886 | 6 | 3.05245 |
| 1 | 140916064 | 140916363 | 300 | 140916134 | 5 | 3.25592 |
| 1 | 141103562 | 141103989 | 428 | 141103613 | 6 | 3.79171 |
| 1 | 141469744 | 141470098 | 355 | 141469939 | 7 | 3.1897  |
| 1 | 141847979 | 141848511 | 533 | 141848110 | 7 | 4.97847 |
| 1 | 141983115 | 141983421 | 307 | 141983338 | 6 | 4.45522 |
| 1 | 142961845 | 142962239 | 395 | 142962158 | 6 | 4.50291 |
| 1 | 143075535 | 143075954 | 420 | 143075855 | 7 | 3.45771 |
| 1 | 144908522 | 144908929 | 408 | 144908741 | 7 | 4.65491 |
| 1 | 145081646 | 145081996 | 351 | 145081673 | 6 | 4.50291 |
| 1 | 145480658 | 145480993 | 336 | 145480737 | 7 | 3.45771 |
| 1 | 145905687 | 145906020 | 334 | 145905868 | 6 | 3.3206  |
| 1 | 146183194 | 146183521 | 328 | 146183242 | 6 | 4.50291 |
| 1 | 146676748 | 146677112 | 365 | 146677063 | 7 | 5.47978 |
| 1 | 147095239 | 147095553 | 315 | 147095255 | 6 | 4.50291 |
| 1 | 147129567 | 147129929 | 363 | 147129629 | 6 | 4.02633 |
| 1 | 147869595 | 147869942 | 348 | 147869854 | 7 | 5.42458 |
| 1 | 147884873 | 147885324 | 452 | 147884898 | 7 | 5.42458 |
| 1 | 148028675 | 148029016 | 342 | 148028871 | 8 | 6.50668 |
| 1 | 148108015 | 148108382 | 368 | 148108244 | 7 | 4.65491 |
| 1 | 148250211 | 148250576 | 366 | 148250529 | 6 | 4.50291 |
| 1 | 148571015 | 148571380 | 366 | 148571210 | 6 | 3.79171 |
| 1 | 148576544 | 148576901 | 358 | 148576568 | 5 | 3.41441 |
| 1 | 148849450 | 148849788 | 339 | 148849658 | 6 | 3.08059 |
| 1 | 149229546 | 149229968 | 423 | 149229711 | 8 | 5.93643 |
| 1 | 149609262 | 149609617 | 356 | 149609465 | 5 | 3.25592 |
| 1 | 152297973 | 152298316 | 344 | 152297984 | 7 | 3.45771 |
| 1 | 153552171 | 153552549 | 379 | 153552499 | 7 | 3.45771 |
| 1 | 154592318 | 154592638 | 321 | 154592519 | 7 | 5.47978 |
| 1 | 154617193 | 154617516 | 324 | 154617382 | 6 | 4.50291 |
| 1 | 154743945 | 154744261 | 317 | 154744101 | 5 | 3.58241 |
| 1 | 157614069 | 157614531 | 463 | 157614480 | 6 | 4.40359 |
| 1 | 157734798 | 157735097 | 300 | 157735048 | 6 | 4.50291 |
| 1 | 157870925 | 157871269 | 345 | 157871100 | 5 | 3.58241 |
| 1 | 158439527 | 158439838 | 312 | 158439552 | 7 | 3.1897  |
| 1 | 158482583 | 158482883 | 301 | 158482804 | 6 | 4.07032 |
| 1 | 159040055 | 159040519 | 465 | 159040240 | 8 | 6.30939 |
| 1 | 161482140 | 161482480 | 341 | 161482415 | 8 | 4.69722 |
| 1 | 164740907 | 164741297 | 391 | 164741140 | 8 | 6.50668 |
| 1 | 164981705 | 164982030 | 326 | 164981777 | 6 | 3.62733 |
| 1 | 165253738 | 165254089 | 352 | 165253872 | 8 | 5.56774 |

|    |           |           |     |           |    |         |
|----|-----------|-----------|-----|-----------|----|---------|
| 1  | 166542288 | 166542651 | 364 | 166542549 | 8  | 6.50668 |
| 1  | 166676785 | 166677127 | 343 | 166676954 | 7  | 4.97847 |
| 1  | 166915571 | 166915925 | 355 | 166915799 | 9  | 6.33515 |
| 1  | 168530718 | 168531065 | 348 | 168530825 | 7  | 3.45771 |
| 1  | 169015485 | 169015815 | 331 | 169015507 | 5  | 3.5422  |
| 1  | 169321746 | 169322064 | 319 | 169321808 | 7  | 5.47978 |
| 1  | 170237058 | 170237411 | 354 | 170237160 | 6  | 4.35303 |
| 1  | 171581243 | 171581626 | 384 | 171581320 | 7  | 4.06945 |
| 1  | 172421260 | 172421654 | 395 | 172421383 | 7  | 4.87731 |
| 1  | 173205654 | 173205959 | 306 | 173205903 | 6  | 3.66421 |
| 1  | 173444958 | 173445260 | 303 | 173444982 | 5  | 3.58241 |
| 1  | 174812243 | 174812551 | 309 | 174812480 | 8  | 4.94122 |
| 1  | 175081468 | 175081814 | 347 | 175081806 | 6  | 3.79171 |
| 1  | 176568033 | 176568509 | 477 | 176568155 | 6  | 4.50291 |
| 1  | 177912487 | 177912933 | 447 | 177912845 | 8  | 4.10153 |
| 1  | 178009317 | 178009704 | 388 | 178009529 | 5  | 3.49869 |
| 1  | 178815468 | 178815816 | 349 | 178815655 | 8  | 6.30939 |
| 1  | 180558803 | 180559193 | 391 | 180559121 | 9  | 5.37431 |
| 1  | 181266095 | 181266480 | 386 | 181266266 | 10 | 7.52331 |
| 1  | 182215595 | 182215952 | 358 | 182215877 | 9  | 6.52524 |
| 1  | 184371892 | 184372249 | 358 | 184372059 | 9  | 4.63301 |
| 1  | 186025751 | 186026066 | 316 | 186025886 | 8  | 6.37597 |
| 1  | 187113183 | 187113533 | 351 | 187113263 | 5  | 3.37357 |
| 1  | 193060771 | 193061074 | 304 | 193060895 | 7  | 5.47978 |
| 1  | 194122289 | 194122598 | 310 | 194122359 | 5  | 3.21823 |
| 1  | 194615060 | 194615379 | 320 | 194615230 | 7  | 4.10626 |
| 1  | 195059547 | 195059879 | 333 | 195059697 | 6  | 4.50291 |
| 10 | 3116337   | 3116704   | 368 | 3116422   | 14 | 3.16431 |
| 10 | 5435426   | 5435756   | 331 | 5435567   | 6  | 4.30352 |
| 10 | 5841167   | 5841585   | 419 | 5841485   | 9  | 4.98189 |
| 10 | 5846963   | 5847487   | 525 | 5847386   | 5  | 3.00646 |
| 10 | 10611702  | 10612023  | 322 | 10611737  | 5  | 3.5422  |
| 10 | 11943651  | 11943970  | 320 | 11943809  | 7  | 4.65491 |
| 10 | 13896820  | 13897177  | 358 | 13897028  | 8  | 6.50668 |
| 10 | 15074504  | 15075036  | 533 | 15074795  | 7  | 3.45771 |
| 10 | 15104496  | 15104828  | 333 | 15104534  | 6  | 4.20747 |
| 10 | 15269811  | 15270133  | 323 | 15269999  | 6  | 4.50291 |
| 10 | 15858982  | 15859354  | 373 | 15859052  | 6  | 3.79171 |
| 10 | 16299522  | 16299895  | 374 | 16299547  | 6  | 4.50291 |
| 10 | 23040204  | 23040528  | 325 | 23040334  | 5  | 3.33356 |
| 10 | 24232990  | 24233293  | 304 | 24233268  | 6  | 4.50291 |
| 10 | 24630473  | 24630814  | 342 | 24630627  | 6  | 4.50291 |
| 10 | 24717440  | 24717777  | 338 | 24717642  | 5  | 3.58241 |
| 10 | 27262605  | 27262904  | 300 | 27262807  | 6  | 4.50291 |
| 10 | 27553354  | 27553709  | 356 | 27553665  | 6  | 3.98315 |
| 10 | 27700885  | 27701229  | 345 | 27701215  | 6  | 4.40359 |
| 10 | 28158353  | 28158723  | 371 | 28158457  | 5  | 3.58241 |
| 10 | 30819664  | 30820078  | 415 | 30819805  | 9  | 7.57852 |

|    |           |           |     |           |    |         |
|----|-----------|-----------|-----|-----------|----|---------|
| 10 | 30903659  | 30904005  | 347 | 30903684  | 8  | 3.28682 |
| 10 | 31986906  | 31987279  | 374 | 31987136  | 8  | 5.65592 |
| 10 | 33707687  | 33708004  | 318 | 33707845  | 5  | 3.58241 |
| 10 | 35758757  | 35759078  | 322 | 35758959  | 7  | 5.47978 |
| 10 | 36061454  | 36061767  | 314 | 36061490  | 7  | 4.87731 |
| 10 | 37288747  | 37289080  | 334 | 37288997  | 5  | 3.04015 |
| 10 | 40120872  | 40121180  | 309 | 40121104  | 8  | 4.19779 |
| 10 | 40942705  | 40943028  | 324 | 40942840  | 5  | 3.58241 |
| 10 | 44469908  | 44470257  | 350 | 44470102  | 7  | 5.47978 |
| 10 | 45503840  | 45504340  | 501 | 45504115  | 7  | 5.47978 |
| 10 | 45529869  | 45530211  | 343 | 45530051  | 7  | 4.65491 |
| 10 | 45779665  | 45780077  | 413 | 45779789  | 7  | 5.42458 |
| 10 | 46329824  | 46330148  | 325 | 46330124  | 5  | 3.37357 |
| 10 | 46493157  | 46493484  | 328 | 46493338  | 6  | 4.07032 |
| 10 | 47176440  | 47176740  | 301 | 47176498  | 7  | 4.50662 |
| 10 | 48030149  | 48030534  | 386 | 48030376  | 7  | 5.47978 |
| 10 | 48234867  | 48235181  | 315 | 48234974  | 7  | 4.65491 |
| 10 | 49991804  | 49992103  | 300 | 49991813  | 6  | 3.66421 |
| 10 | 50558707  | 50559028  | 322 | 50558872  | 7  | 5.47978 |
| 10 | 51652881  | 51653233  | 353 | 51653114  | 6  | 4.50291 |
| 10 | 52055081  | 52055427  | 347 | 52055317  | 5  | 3.58241 |
| 10 | 52082014  | 52082344  | 331 | 52082219  | 6  | 4.45522 |
| 10 | 54144290  | 54144641  | 352 | 54144368  | 9  | 4.98189 |
| 10 | 54662480  | 54662880  | 401 | 54662736  | 5  | 3.58241 |
| 10 | 55266243  | 55266553  | 311 | 55266438  | 7  | 4.65491 |
| 10 | 55690427  | 55690774  | 348 | 55690435  | 5  | 3.58241 |
| 10 | 55764179  | 55764516  | 338 | 55764366  | 6  | 4.50291 |
| 10 | 56146183  | 56146519  | 337 | 56146227  | 5  | 3.58241 |
| 10 | 63507745  | 63508061  | 317 | 63507904  | 7  | 4.65491 |
| 10 | 64490049  | 64490410  | 362 | 64490174  | 8  | 6.11749 |
| 10 | 64783711  | 64784055  | 345 | 64784015  | 5  | 3.58241 |
| 10 | 65688742  | 65689108  | 367 | 65688812  | 6  | 4.02633 |
| 10 | 68225148  | 68225517  | 370 | 68225441  | 6  | 4.07032 |
| 10 | 71587363  | 71587671  | 309 | 71587511  | 5  | 3.58241 |
| 10 | 71631960  | 71632311  | 352 | 71632138  | 8  | 5.39858 |
| 10 | 72416549  | 72416851  | 303 | 72416674  | 7  | 5.47978 |
| 10 | 72771915  | 72772263  | 349 | 72771959  | 5  | 3.41441 |
| 10 | 74114710  | 74115061  | 352 | 74114977  | 8  | 6.50668 |
| 10 | 74283400  | 74283705  | 306 | 74283591  | 6  | 4.07032 |
| 10 | 76922462  | 76922789  | 328 | 76922724  | 5  | 3.58241 |
| 10 | 83789370  | 83789756  | 387 | 83789656  | 9  | 4.98189 |
| 10 | 89159249  | 89159632  | 384 | 89159334  | 7  | 4.65491 |
| 10 | 89281686  | 89281987  | 302 | 89281924  | 7  | 5.47978 |
| 10 | 90994526  | 90995252  | 727 | 90994849  | 5  | 3.58241 |
| 10 | 91945476  | 91945810  | 335 | 91945512  | 7  | 4.65491 |
| 10 | 92388095  | 92388415  | 321 | 92388187  | 10 | 7.52331 |
| 10 | 98001196  | 98001567  | 372 | 98001215  | 6  | 4.50291 |
| 10 | 102431936 | 102432293 | 358 | 102431952 | 5  | 3.58241 |

|    |           |           |     |           |   |         |
|----|-----------|-----------|-----|-----------|---|---------|
| 10 | 104381761 | 104382107 | 347 | 104381983 | 6 | 4.50291 |
| 10 | 104766223 | 104766811 | 589 | 104766699 | 6 | 4.50291 |
| 10 | 105207303 | 105207682 | 380 | 105207437 | 7 | 5.47978 |
| 10 | 106236206 | 106236537 | 332 | 106236322 | 8 | 6.50668 |
| 10 | 106520665 | 106521002 | 338 | 106520815 | 6 | 4.11516 |
| 10 | 109957881 | 109958190 | 310 | 109957901 | 5 | 3.33356 |
| 10 | 112003066 | 112003397 | 332 | 112003268 | 6 | 3.85827 |
| 10 | 112055410 | 112055840 | 431 | 112055567 | 7 | 4.65491 |
| 10 | 112142895 | 112143254 | 360 | 112143125 | 7 | 4.65491 |
| 10 | 112589196 | 112589626 | 431 | 112589449 | 8 | 6.50668 |
| 10 | 113714504 | 113714829 | 326 | 113714716 | 8 | 4.19779 |
| 10 | 113725281 | 113725616 | 336 | 113725490 | 6 | 4.07032 |
| 10 | 114168442 | 114168749 | 308 | 114168705 | 8 | 5.56774 |
| 10 | 114193549 | 114193961 | 413 | 114193893 | 6 | 4.50291 |
| 10 | 120349421 | 120349753 | 333 | 120349582 | 7 | 4.65491 |
| 10 | 121498505 | 121498827 | 323 | 121498572 | 6 | 4.50291 |
| 10 | 122206105 | 122206429 | 325 | 122206215 | 9 | 6.52524 |
| 10 | 123479562 | 123479870 | 309 | 123479616 | 8 | 6.44394 |
| 10 | 123489704 | 123490041 | 338 | 123489921 | 6 | 4.50291 |
| 10 | 123701000 | 123701300 | 301 | 123701117 | 8 | 5.93643 |
| 10 | 124022655 | 124023021 | 367 | 124022971 | 6 | 4.50291 |
| 10 | 124753586 | 124753886 | 301 | 124753753 | 5 | 3.58241 |
| 10 | 124953242 | 124953609 | 368 | 124953505 | 7 | 5.47978 |
| 10 | 125065551 | 125065903 | 353 | 125065710 | 7 | 3.45771 |
| 10 | 129175647 | 129176166 | 520 | 129175776 | 8 | 5.87829 |
| 10 | 129405104 | 129405683 | 580 | 129405420 | 9 | 4.98189 |
| 10 | 129466614 | 129466969 | 356 | 129466670 | 6 | 4.16086 |
| 10 | 129928744 | 129929079 | 336 | 129928770 | 7 | 4.65491 |
| 10 | 130123681 | 130124026 | 346 | 130123740 | 9 | 7.57852 |
| 11 | 3439472   | 3439771   | 300 | 3439502   | 6 | 4.50291 |
| 11 | 5382921   | 5383277   | 357 | 5383075   | 7 | 4.65491 |
| 11 | 5639992   | 5640348   | 357 | 5640224   | 6 | 4.50291 |
| 11 | 9591430   | 9591770   | 341 | 9591604   | 6 | 4.50291 |
| 11 | 9606110   | 9606429   | 320 | 9606159   | 6 | 3.79171 |
| 11 | 10413750  | 10414191  | 442 | 10414021  | 8 | 6.50668 |
| 11 | 10817134  | 10817439  | 306 | 10817344  | 5 | 3.58241 |
| 11 | 12757281  | 12757650  | 370 | 12757417  | 7 | 5.47978 |
| 11 | 13069750  | 13070051  | 302 | 13069851  | 7 | 5.42458 |
| 11 | 13159759  | 13160062  | 304 | 13159959  | 5 | 3.4561  |
| 11 | 14485377  | 14485712  | 336 | 14485506  | 5 | 3.58241 |
| 11 | 15710680  | 15710998  | 319 | 15710888  | 6 | 4.20747 |
| 11 | 16333269  | 16333633  | 365 | 16333556  | 5 | 3.33356 |
| 11 | 18265631  | 18265941  | 311 | 18265786  | 7 | 5.47978 |
| 11 | 18731573  | 18732073  | 501 | 18731790  | 7 | 5.47978 |
| 11 | 19085267  | 19085604  | 338 | 19085389  | 7 | 5.24887 |
| 11 | 21285319  | 21285656  | 338 | 21285618  | 5 | 3.21823 |
| 11 | 23922683  | 23922994  | 312 | 23922696  | 6 | 4.50291 |
| 11 | 26227333  | 26227674  | 342 | 26227609  | 6 | 4.50291 |

|    |           |           |     |           |    |          |
|----|-----------|-----------|-----|-----------|----|----------|
| 11 | 27869171  | 27869558  | 388 | 27869415  | 9  | 7.35743  |
| 11 | 27907819  | 27908194  | 376 | 27907960  | 7  | 4.65491  |
| 11 | 27996411  | 27996742  | 332 | 27996633  | 6  | 4.50291  |
| 11 | 28776843  | 28777160  | 318 | 28776890  | 9  | 5.82058  |
| 11 | 28820371  | 28820700  | 330 | 28820482  | 5  | 3.14499  |
| 11 | 31326890  | 31327218  | 329 | 31326970  | 7  | 5.47978  |
| 11 | 33932847  | 33933186  | 340 | 33932878  | 5  | 3.58241  |
| 11 | 36907255  | 36907623  | 369 | 36907352  | 7  | 4.65491  |
| 11 | 38071910  | 38072223  | 314 | 38072049  | 7  | 5.47978  |
| 11 | 40241820  | 40242208  | 389 | 40241998  | 7  | 4.65491  |
| 11 | 42543635  | 42543940  | 306 | 42543759  | 6  | 4.50291  |
| 11 | 43321697  | 43322321  | 625 | 43322203  | 9  | 7.57852  |
| 11 | 45489341  | 45489642  | 302 | 45489416  | 5  | 3.58241  |
| 11 | 46248002  | 46248355  | 354 | 46248180  | 7  | 5.47978  |
| 11 | 47634799  | 47635139  | 341 | 47635136  | 6  | 3.02469  |
| 11 | 47798219  | 47798608  | 390 | 47798439  | 6  | 4.50291  |
| 11 | 50443408  | 50443752  | 345 | 50443472  | 8  | 5.56774  |
| 11 | 51154963  | 51155302  | 340 | 51154985  | 6  | 4.50291  |
| 11 | 56637488  | 56637840  | 353 | 56637535  | 7  | 5.47978  |
| 11 | 58409891  | 58410221  | 331 | 58410063  | 7  | 4.97847  |
| 11 | 58471350  | 58471702  | 353 | 58471542  | 9  | 7.57852  |
| 11 | 65579268  | 65579606  | 339 | 65579341  | 7  | 4.65491  |
| 11 | 65719975  | 65720290  | 316 | 65720129  | 8  | 6.44394  |
| 11 | 66842973  | 66843303  | 331 | 66843297  | 6  | 4.50291  |
| 11 | 72023238  | 72023576  | 339 | 72023520  | 6  | 3.79171  |
| 11 | 73646315  | 73646692  | 378 | 73646318  | 6  | 3.79171  |
| 11 | 73690287  | 73690675  | 389 | 73690419  | 9  | 5.96698  |
| 11 | 73862535  | 73862891  | 357 | 73862855  | 6  | 4.50291  |
| 11 | 78124872  | 78125363  | 492 | 78125093  | 5  | 3.58241  |
| 11 | 81753831  | 81754292  | 462 | 81753870  | 7  | 4.65491  |
| 11 | 82701387  | 82701708  | 322 | 82701570  | 5  | 3.29435  |
| 11 | 83210102  | 83210402  | 301 | 83210341  | 6  | 4.02633  |
| 11 | 84617085  | 84617401  | 317 | 84617298  | 5  | 3.58241  |
| 11 | 87365548  | 87365918  | 371 | 87365833  | 6  | 4.50291  |
| 11 | 87422678  | 87423156  | 479 | 87423083  | 10 | 5.13367  |
| 11 | 87462299  | 87462904  | 606 | 87462388  | 17 | 11.18385 |
| 11 | 89854409  | 89854731  | 323 | 89854509  | 6  | 3.79171  |
| 11 | 92189008  | 92189472  | 465 | 92189089  | 7  | 4.10626  |
| 11 | 93281166  | 93281479  | 314 | 93281219  | 5  | 3.58241  |
| 11 | 93395580  | 93395943  | 364 | 93395625  | 6  | 3.79171  |
| 11 | 99551159  | 99551460  | 302 | 99551302  | 7  | 5.30623  |
| 11 | 100921012 | 100921400 | 389 | 100921338 | 5  | 3.41441  |
| 11 | 101658330 | 101658911 | 582 | 101658753 | 10 | 5.41652  |
| 11 | 102102047 | 102102462 | 416 | 102102142 | 6  | 4.50291  |
| 11 | 103444986 | 103445466 | 481 | 103445048 | 6  | 4.50291  |
| 11 | 104962833 | 104963308 | 476 | 104963117 | 7  | 4.65491  |
| 11 | 109011704 | 109012031 | 328 | 109011869 | 53 | 18.64715 |
| 11 | 111225428 | 111225795 | 368 | 111225481 | 7  | 4.73225  |

|    |           |           |     |           |    |          |
|----|-----------|-----------|-----|-----------|----|----------|
| 11 | 112152908 | 112153232 | 325 | 112153177 | 6  | 4.50291  |
| 11 | 114022953 | 114023294 | 342 | 114023160 | 6  | 3.79171  |
| 11 | 121258736 | 121259062 | 327 | 121258785 | 8  | 6.24414  |
| 11 | 121372282 | 121372657 | 376 | 121372417 | 5  | 3.4561   |
| 11 | 121397487 | 121397793 | 307 | 121397719 | 5  | 3.29435  |
| 12 | 6805902   | 6806254   | 353 | 6805929   | 6  | 3.79171  |
| 12 | 7034427   | 7034869   | 443 | 7034525   | 5  | 3.58241  |
| 12 | 7717324   | 7717626   | 303 | 7717371   | 5  | 3.58241  |
| 12 | 13762114  | 13762414  | 301 | 13762118  | 6  | 4.50291  |
| 12 | 14690623  | 14690984  | 362 | 14690793  | 6  | 4.50291  |
| 12 | 22147715  | 22148021  | 307 | 22147878  | 5  | 3.58241  |
| 12 | 30821784  | 30822137  | 354 | 30822040  | 12 | 5.12228  |
| 12 | 31360833  | 31361154  | 322 | 31361105  | 8  | 5.56774  |
| 12 | 32048397  | 32048751  | 355 | 32048644  | 6  | 4.11516  |
| 12 | 39069939  | 39070275  | 337 | 39070169  | 5  | 3.58241  |
| 12 | 40375029  | 40375420  | 392 | 40375278  | 7  | 4.65491  |
| 12 | 44260317  | 44260649  | 333 | 44260328  | 5  | 3.41441  |
| 12 | 49759261  | 49759613  | 353 | 49759413  | 7  | 5.47978  |
| 12 | 51386795  | 51387104  | 310 | 51386960  | 5  | 3.58241  |
| 12 | 68689170  | 68689521  | 352 | 68689331  | 7  | 5.47978  |
| 12 | 69608357  | 69608771  | 415 | 69608643  | 24 | 27.25352 |
| 12 | 77551750  | 77552292  | 543 | 77551863  | 9  | 7.57852  |
| 12 | 83678077  | 83678399  | 323 | 83678220  | 5  | 3.4561   |
| 12 | 84519119  | 84519482  | 364 | 84519213  | 6  | 4.50291  |
| 12 | 91167441  | 91167849  | 409 | 91167494  | 7  | 5.47978  |
| 12 | 94469450  | 94469782  | 333 | 94469524  | 6  | 4.50291  |
| 12 | 94622046  | 94622366  | 321 | 94622240  | 7  | 4.65491  |
| 12 | 96742311  | 96742618  | 308 | 96742576  | 7  | 5.24887  |
| 12 | 97675029  | 97675474  | 446 | 97675102  | 6  | 4.50291  |
| 12 | 99823703  | 99824050  | 348 | 99823802  | 7  | 5.47978  |
| 12 | 101355514 | 101355848 | 335 | 101355687 | 5  | 3.58241  |
| 12 | 107812103 | 107812447 | 345 | 107812118 | 6  | 4.50291  |
| 12 | 117539818 | 117540164 | 347 | 117540007 | 5  | 3.58241  |
| 12 | 117626061 | 117626390 | 330 | 117626241 | 6  | 3.79171  |
| 12 | 120028670 | 120029002 | 333 | 120028844 | 30 | 21.28436 |
| 13 | 3112205   | 3112572   | 368 | 3112480   | 7  | 5.47978  |
| 13 | 6880197   | 6880551   | 355 | 6880368   | 5  | 3.58241  |
| 13 | 8764064   | 8764386   | 323 | 8764159   | 6  | 3.45162  |
| 13 | 13860611  | 13861002  | 392 | 13860864  | 32 | 39.551   |
| 13 | 16669448  | 16669757  | 310 | 16669560  | 6  | 4.50291  |
| 13 | 21601266  | 21601587  | 322 | 21601446  | 7  | 4.65491  |
| 13 | 21630285  | 21630973  | 689 | 21630778  | 9  | 6.52524  |
| 13 | 51561516  | 51562039  | 524 | 51561543  | 7  | 4.50662  |
| 13 | 52307318  | 52307627  | 310 | 52307457  | 8  | 6.50668  |
| 13 | 55041202  | 55041533  | 332 | 55041366  | 5  | 3.58241  |
| 13 | 65444347  | 65444741  | 395 | 65444611  | 8  | 5.56774  |
| 13 | 65904378  | 65904809  | 432 | 65904543  | 9  | 7.57852  |
| 13 | 66002811  | 66003211  | 401 | 66002949  | 7  | 5.47978  |



|    |           |           |     |           |    |          |
|----|-----------|-----------|-----|-----------|----|----------|
| 13 | 66459708  | 66460036  | 329 | 66459747  | 5  | 3.58241  |
| 13 | 66633651  | 66633950  | 300 | 66633651  | 7  | 3.45771  |
| 13 | 66644174  | 66644544  | 371 | 66644206  | 7  | 5.47978  |
| 13 | 66755293  | 66755761  | 469 | 66755656  | 6  | 4.50291  |
| 13 | 68080034  | 68080400  | 367 | 68080064  | 6  | 4.50291  |
| 13 | 77682010  | 77682391  | 382 | 77682250  | 7  | 5.47978  |
| 13 | 80025687  | 80026059  | 373 | 80025844  | 7  | 4.65491  |
| 13 | 81506956  | 81507302  | 347 | 81506993  | 6  | 4.50291  |
| 13 | 86599593  | 86599918  | 326 | 86599656  | 5  | 3.58241  |
| 13 | 88661531  | 88661927  | 397 | 88661662  | 6  | 3.79171  |
| 13 | 90444717  | 90445022  | 306 | 90444856  | 5  | 3.58241  |
| 13 | 94739169  | 94739573  | 405 | 94739417  | 6  | 4.50291  |
| 13 | 95506779  | 95507164  | 386 | 95506969  | 8  | 6.50668  |
| 13 | 96848232  | 96848749  | 518 | 96848599  | 6  | 3.79171  |
| 13 | 98495629  | 98496012  | 384 | 98495768  | 25 | 28.73729 |
| 13 | 106375096 | 106375451 | 356 | 106375267 | 8  | 6.50668  |
| 13 | 108598087 | 108598443 | 357 | 108598165 | 6  | 4.45522  |
| 13 | 118178967 | 118179539 | 573 | 118179112 | 7  | 5.19265  |
| 13 | 118258055 | 118258366 | 312 | 118258257 | 6  | 4.50291  |
| 13 | 119491694 | 119492077 | 384 | 119491740 | 16 | 4.50822  |
| 14 | 3217078   | 3217545   | 468 | 3217155   | 6  | 4.35303  |
| 14 | 3361275   | 3361706   | 432 | 3361600   | 8  | 4.19779  |
| 14 | 3420477   | 3420800   | 324 | 3420666   | 8  | 6.50668  |
| 14 | 3981105   | 3981412   | 308 | 3981126   | 8  | 5.11589  |
| 14 | 4194468   | 4194800   | 333 | 4194757   | 6  | 3.66421  |
| 14 | 4270950   | 4271314   | 365 | 4271313   | 8  | 3.28682  |
| 14 | 4383893   | 4384278   | 386 | 4384120   | 9  | 6.52524  |
| 14 | 4687882   | 4688233   | 352 | 4688035   | 7  | 5.36479  |
| 14 | 4811588   | 4811906   | 319 | 4811780   | 9  | 4.6997   |
| 14 | 4816555   | 4816918   | 364 | 4816912   | 8  | 4.00857  |
| 14 | 4853212   | 4853565   | 354 | 4853490   | 8  | 6.50668  |
| 14 | 5078128   | 5078574   | 447 | 5078268   | 6  | 3.8181   |
| 14 | 5308250   | 5308755   | 506 | 5308569   | 8  | 4.19779  |
| 14 | 5973019   | 5973524   | 506 | 5973502   | 6  | 3.79171  |
| 14 | 6139592   | 6139931   | 340 | 6139621   | 6  | 3.3206   |
| 14 | 6205823   | 6206169   | 347 | 6206075   | 12 | 4.31384  |
| 14 | 6213759   | 6214073   | 315 | 6213988   | 9  | 4.98189  |
| 14 | 6260387   | 6260971   | 585 | 6260702   | 12 | 3.66359  |
| 14 | 6277313   | 6277644   | 332 | 6277551   | 11 | 4.44564  |
| 14 | 6782811   | 6783521   | 711 | 6783302   | 8  | 4.19779  |
| 14 | 6892518   | 6892882   | 365 | 6892672   | 8  | 6.50668  |
| 14 | 6920918   | 6921444   | 527 | 6921169   | 7  | 3.09081  |
| 14 | 6984533   | 6985169   | 637 | 6984541   | 9  | 3.19498  |
| 14 | 7015805   | 7016131   | 327 | 7015932   | 8  | 5.93643  |
| 14 | 8654207   | 8654589   | 383 | 8654354   | 10 | 5.80609  |
| 14 | 8909491   | 8909875   | 385 | 8909539   | 7  | 5.47978  |
| 14 | 9359612   | 9360107   | 496 | 9359985   | 5  | 3.58241  |
| 14 | 9509196   | 9509506   | 311 | 9509226   | 7  | 3.45771  |

|    |          |          |      |          |      |           |
|----|----------|----------|------|----------|------|-----------|
| 14 | 9512600  | 9512945  | 346  | 9512714  | 6    | 4.25501   |
| 14 | 9699943  | 9700296  | 354  | 9700080  | 9    | 5.37431   |
| 14 | 10303441 | 10303766 | 326  | 10303576 | 8    | 5.71006   |
| 14 | 11092520 | 11092896 | 377  | 11092607 | 6    | 3.98315   |
| 14 | 11492566 | 11493285 | 720  | 11492878 | 6    | 4.16086   |
| 14 | 13203896 | 13204258 | 363  | 13204063 | 7    | 5.47978   |
| 14 | 13657065 | 13657413 | 349  | 13657286 | 7    | 3.92737   |
| 14 | 14265374 | 14265686 | 313  | 14265661 | 6    | 3.3206    |
| 14 | 14639129 | 14639473 | 345  | 14639283 | 9    | 4.98189   |
| 14 | 17614815 | 17615116 | 302  | 17614964 | 6    | 3.79171   |
| 14 | 19416895 | 19418146 | 1252 | 19417280 | 7674 | 398.85123 |
| 14 | 19418541 | 19418953 | 413  | 19418856 | 3828 | 83.72426  |
| 14 | 19662526 | 19662868 | 343  | 19662566 | 6    | 3.79171   |
| 14 | 26723214 | 26723586 | 373  | 26723235 | 8    | 5.56774   |
| 14 | 26768499 | 26768848 | 350  | 26768656 | 8    | 6.50668   |
| 14 | 26913115 | 26913465 | 351  | 26913339 | 6    | 4.50291   |
| 14 | 28910242 | 28910602 | 361  | 28910518 | 6    | 3.89915   |
| 14 | 32848204 | 32848507 | 304  | 32848369 | 7    | 5.47978   |
| 14 | 39198627 | 39198962 | 336  | 39198800 | 8    | 6.50668   |
| 14 | 39543281 | 39543704 | 424  | 39543556 | 6    | 4.50291   |
| 14 | 39567342 | 39567685 | 344  | 39567465 | 7    | 5.47978   |
| 14 | 40235785 | 40236102 | 318  | 40235857 | 6    | 3.79171   |
| 14 | 41447376 | 41447749 | 374  | 41447651 | 14   | 5.60303   |
| 14 | 41635767 | 41636079 | 313  | 41635913 | 10   | 3.80233   |
| 14 | 41657268 | 41657723 | 456  | 41657643 | 9    | 4.76787   |
| 14 | 41763727 | 41764035 | 309  | 41763831 | 11   | 6.66709   |
| 14 | 41911292 | 41911610 | 319  | 41911424 | 8    | 4.19779   |
| 14 | 41966372 | 41966744 | 373  | 41966668 | 8    | 5.3496    |
| 14 | 42212357 | 42212656 | 300  | 42212407 | 10   | 4.46113   |
| 14 | 42215977 | 42216426 | 450  | 42216008 | 12   | 5.60636   |
| 14 | 42981142 | 42981846 | 705  | 42981689 | 7    | 5.19265   |
| 14 | 43616074 | 43616465 | 392  | 43616341 | 10   | 5.80609   |
| 14 | 43696336 | 43696650 | 315  | 43696567 | 7    | 3.26685   |
| 14 | 45592747 | 45593107 | 361  | 45593001 | 7    | 4.65491   |
| 14 | 46180774 | 46181090 | 317  | 46180890 | 6    | 4.50291   |
| 14 | 49766377 | 49766733 | 357  | 49766493 | 6    | 4.50291   |
| 14 | 49826597 | 49826898 | 302  | 49826794 | 6    | 4.50291   |
| 14 | 49888021 | 49888532 | 512  | 49888093 | 6    | 4.50291   |
| 14 | 50420204 | 50420621 | 418  | 50420517 | 8    | 6.50668   |
| 14 | 52219142 | 52219447 | 306  | 52219317 | 5    | 3.07446   |
| 14 | 53013828 | 53014193 | 366  | 53014082 | 5    | 3.58241   |
| 14 | 63113000 | 63113323 | 324  | 63113034 | 5    | 3.1094    |
| 14 | 65181656 | 65182033 | 378  | 65181876 | 7    | 5.47978   |
| 14 | 74100143 | 74100470 | 328  | 74100156 | 7    | 3.76048   |
| 14 | 77755816 | 77756169 | 354  | 77755974 | 5    | 3.58241   |
| 14 | 80842530 | 80842832 | 303  | 80842745 | 7    | 3.45771   |
| 14 | 81383074 | 81383401 | 328  | 81383082 | 5    | 3.58241   |
| 14 | 83847158 | 83847602 | 445  | 83847283 | 6    | 4.50291   |

|    |           |           |     |           |    |          |
|----|-----------|-----------|-----|-----------|----|----------|
| 14 | 84111099  | 84111421  | 323 | 84111333  | 6  | 4.20747  |
| 14 | 84600063  | 84600410  | 348 | 84600176  | 5  | 3.58241  |
| 14 | 84980412  | 84980735  | 324 | 84980424  | 6  | 3.02469  |
| 14 | 85352116  | 85352465  | 350 | 85352148  | 7  | 5.47978  |
| 14 | 86726836  | 86727156  | 321 | 86727154  | 6  | 4.02633  |
| 14 | 87191890  | 87192492  | 603 | 87192432  | 7  | 3.45771  |
| 14 | 87265659  | 87266022  | 364 | 87265838  | 6  | 4.07032  |
| 14 | 87701793  | 87702117  | 325 | 87701940  | 6  | 3.79171  |
| 14 | 89088911  | 89089278  | 368 | 89088969  | 6  | 4.50291  |
| 14 | 90064457  | 90064764  | 308 | 90064597  | 7  | 5.36479  |
| 14 | 90919153  | 90919653  | 501 | 90919401  | 7  | 5.47978  |
| 14 | 91382438  | 91382793  | 356 | 91382661  | 8  | 5.56774  |
| 14 | 91563231  | 91563647  | 417 | 91563596  | 7  | 5.47978  |
| 14 | 92594525  | 92595230  | 706 | 92594656  | 6  | 4.50291  |
| 14 | 93325935  | 93326280  | 346 | 93326013  | 6  | 4.50291  |
| 14 | 93366170  | 93366532  | 363 | 93366459  | 6  | 4.50291  |
| 14 | 94659508  | 94659831  | 324 | 94659652  | 6  | 4.50291  |
| 14 | 95466767  | 95467067  | 301 | 95466941  | 6  | 4.50291  |
| 14 | 95547662  | 95547982  | 321 | 95547788  | 6  | 4.50291  |
| 14 | 96669770  | 96670103  | 334 | 96669946  | 6  | 4.50291  |
| 14 | 96935649  | 96935959  | 311 | 96935776  | 8  | 6.50668  |
| 14 | 97151434  | 97151750  | 317 | 97151667  | 8  | 6.50668  |
| 14 | 97787126  | 97787451  | 326 | 97787180  | 5  | 3.58241  |
| 14 | 97788767  | 97789076  | 310 | 97789038  | 6  | 3.3206   |
| 14 | 97954977  | 97955276  | 300 | 97955147  | 7  | 3.45771  |
| 14 | 98609627  | 98610019  | 393 | 98609738  | 7  | 4.87731  |
| 14 | 98699052  | 98699375  | 324 | 98699368  | 6  | 3.79171  |
| 14 | 100681640 | 100681942 | 303 | 100681640 | 5  | 3.58241  |
| 14 | 103464341 | 103464744 | 404 | 103464481 | 22 | 20.54471 |
| 14 | 105505784 | 105506096 | 313 | 105505881 | 6  | 3.89915  |
| 14 | 105539779 | 105540117 | 339 | 105539929 | 8  | 5.93643  |
| 14 | 105551121 | 105551420 | 300 | 105551123 | 6  | 3.77863  |
| 14 | 105763879 | 105764200 | 322 | 105763913 | 7  | 3.96214  |
| 14 | 106768692 | 106769006 | 315 | 106768821 | 6  | 4.50291  |
| 14 | 107602229 | 107602772 | 544 | 107602465 | 7  | 5.47978  |
| 14 | 110996792 | 110997112 | 321 | 110996928 | 6  | 3.79171  |
| 14 | 119420098 | 119420435 | 338 | 119420117 | 6  | 4.50291  |
| 14 | 119480766 | 119481122 | 357 | 119480831 | 7  | 5.47978  |
| 14 | 122706506 | 122707092 | 587 | 122707027 | 7  | 5.47978  |
| 14 | 123875435 | 123875765 | 331 | 123875478 | 6  | 3.79171  |
| 14 | 124801590 | 124802106 | 517 | 124802075 | 31 | 37.9639  |
| 15 | 3113099   | 3113478   | 380 | 3113338   | 5  | 3.58241  |
| 15 | 4586855   | 4587201   | 347 | 4586928   | 10 | 7.52331  |
| 15 | 6593724   | 6594087   | 364 | 6593823   | 9  | 6.80986  |
| 15 | 7290679   | 7290989   | 311 | 7290944   | 5  | 3.58241  |
| 15 | 8076478   | 8076876   | 399 | 8076758   | 9  | 3.94891  |
| 15 | 9440166   | 9440484   | 319 | 9440228   | 5  | 3.33356  |
| 15 | 9845580   | 9846083   | 504 | 9845738   | 6  | 4.50291  |

|    |          |          |      |          |    |         |
|----|----------|----------|------|----------|----|---------|
| 15 | 10366092 | 10366422 | 331  | 10366247 | 6  | 4.50291 |
| 15 | 11881182 | 11881486 | 305  | 11881285 | 7  | 4.50662 |
| 15 | 13273271 | 13273814 | 544  | 13273286 | 6  | 3.79171 |
| 15 | 14301462 | 14301773 | 312  | 14301496 | 5  | 3.41441 |
| 15 | 14425051 | 14425563 | 513  | 14425473 | 6  | 3.66421 |
| 15 | 14638776 | 14639163 | 388  | 14639106 | 8  | 5.39858 |
| 15 | 15045909 | 15046437 | 529  | 15046186 | 6  | 3.98315 |
| 15 | 15393622 | 15394183 | 562  | 15393972 | 7  | 5.47978 |
| 15 | 16157885 | 16158212 | 328  | 16157958 | 6  | 4.50291 |
| 15 | 16623221 | 16623584 | 364  | 16623409 | 7  | 5.30623 |
| 15 | 16945623 | 16945943 | 321  | 16945831 | 6  | 4.16086 |
| 15 | 17165215 | 17165584 | 370  | 17165544 | 6  | 4.02633 |
| 15 | 18186023 | 18186340 | 318  | 18186290 | 7  | 4.97847 |
| 15 | 18564171 | 18564547 | 377  | 18564399 | 6  | 4.50291 |
| 15 | 19383171 | 19383503 | 333  | 19383199 | 8  | 3.28682 |
| 15 | 19674565 | 19674890 | 326  | 19674854 | 6  | 4.50291 |
| 15 | 19900810 | 19901272 | 463  | 19900909 | 6  | 3.79171 |
| 15 | 20477212 | 20477570 | 359  | 20477555 | 6  | 3.79171 |
| 15 | 21593162 | 21593520 | 359  | 21593165 | 6  | 3.02469 |
| 15 | 21599892 | 21600204 | 313  | 21600065 | 6  | 4.50291 |
| 15 | 21960001 | 21960645 | 645  | 21960587 | 7  | 3.45771 |
| 15 | 22256640 | 22257040 | 401  | 22256936 | 9  | 5.82058 |
| 15 | 22422495 | 22423026 | 532  | 22422716 | 9  | 6.33515 |
| 15 | 22713346 | 22713671 | 326  | 22713669 | 6  | 3.77863 |
| 15 | 22801524 | 22802527 | 1004 | 22802056 | 7  | 4.50662 |
| 15 | 22967336 | 22967686 | 351  | 22967555 | 7  | 4.73225 |
| 15 | 24998189 | 24998495 | 307  | 24998224 | 5  | 3.58241 |
| 15 | 25130698 | 25131043 | 346  | 25130833 | 7  | 4.97847 |
| 15 | 26582487 | 26582912 | 426  | 26582885 | 7  | 3.45771 |
| 15 | 27692712 | 27693038 | 327  | 27692918 | 5  | 3.58241 |
| 15 | 28804087 | 28804567 | 481  | 28804205 | 6  | 3.79171 |
| 15 | 28987934 | 28988264 | 331  | 28988072 | 9  | 6.17252 |
| 15 | 29786608 | 29787259 | 652  | 29786738 | 9  | 6.33515 |
| 15 | 30463008 | 30463318 | 311  | 30463139 | 7  | 5.47978 |
| 15 | 31861737 | 31862048 | 312  | 31861772 | 5  | 3.14499 |
| 15 | 33562746 | 33563051 | 306  | 33562850 | 13 | 4.22859 |
| 15 | 33765692 | 33765993 | 302  | 33765802 | 7  | 3.45771 |
| 15 | 33832293 | 33832848 | 556  | 33832782 | 14 | 4.98112 |
| 15 | 34501137 | 34501449 | 313  | 34501334 | 9  | 4.98189 |
| 15 | 35089113 | 35089415 | 303  | 35089406 | 8  | 3.13864 |
| 15 | 35777683 | 35777988 | 306  | 35777912 | 6  | 3.89915 |
| 15 | 39860915 | 39861249 | 335  | 39861100 | 7  | 4.50662 |
| 15 | 42213853 | 42214211 | 359  | 42213964 | 5  | 3.29435 |
| 15 | 42237148 | 42237508 | 361  | 42237489 | 7  | 3.99741 |
| 15 | 44242344 | 44242663 | 320  | 44242452 | 7  | 5.30623 |
| 15 | 44790991 | 44791385 | 395  | 44791240 | 8  | 5.99565 |
| 15 | 44875567 | 44875874 | 308  | 44875810 | 6  | 3.52023 |
| 15 | 45438280 | 45438607 | 328  | 45438490 | 7  | 5.30623 |

|    |           |           |     |           |    |         |
|----|-----------|-----------|-----|-----------|----|---------|
| 15 | 46498911  | 46499229  | 319 | 46498924  | 7  | 3.45771 |
| 15 | 46612862  | 46613298  | 437 | 46613017  | 6  | 4.11516 |
| 15 | 47545998  | 47546300  | 303 | 47546236  | 6  | 4.50291 |
| 15 | 48892857  | 48893255  | 399 | 48893072  | 7  | 4.92742 |
| 15 | 48975706  | 48976098  | 393 | 48975753  | 6  | 3.62733 |
| 15 | 49011063  | 49011394  | 332 | 49011087  | 6  | 4.07032 |
| 15 | 51231951  | 51232285  | 335 | 51231979  | 9  | 4.44134 |
| 15 | 52526905  | 52527208  | 304 | 52527050  | 8  | 4.94122 |
| 15 | 54676453  | 54676811  | 359 | 54676773  | 7  | 4.92742 |
| 15 | 54750762  | 54751121  | 360 | 54750965  | 7  | 3.45771 |
| 15 | 55293431  | 55293742  | 312 | 55293671  | 8  | 3.28682 |
| 15 | 56068264  | 56068593  | 330 | 56068421  | 5  | 3.1094  |
| 15 | 65280879  | 65281178  | 300 | 65281131  | 7  | 4.50662 |
| 15 | 65522061  | 65522439  | 379 | 65522172  | 6  | 4.50291 |
| 15 | 66077715  | 66078026  | 312 | 66077958  | 6  | 4.16086 |
| 15 | 66841816  | 66842126  | 311 | 66841939  | 8  | 4.19779 |
| 15 | 67966780  | 67967109  | 330 | 67966985  | 7  | 4.22    |
| 15 | 68637478  | 68637825  | 348 | 68637661  | 7  | 5.47978 |
| 15 | 68855857  | 68856222  | 366 | 68855912  | 6  | 4.50291 |
| 15 | 69401090  | 69401425  | 336 | 69401314  | 8  | 5.56774 |
| 15 | 70342393  | 70342706  | 314 | 70342551  | 6  | 4.40359 |
| 15 | 70360072  | 70360408  | 337 | 70360196  | 5  | 3.33356 |
| 15 | 70832040  | 70832380  | 341 | 70832283  | 7  | 4.87731 |
| 15 | 71105708  | 71106243  | 536 | 71105952  | 7  | 3.45771 |
| 15 | 71109939  | 71110269  | 331 | 71109979  | 6  | 4.50291 |
| 15 | 71999678  | 72000018  | 341 | 71999715  | 6  | 3.79171 |
| 15 | 72088258  | 72088574  | 317 | 72088277  | 7  | 5.03049 |
| 15 | 72519574  | 72519961  | 388 | 72519754  | 7  | 5.47978 |
| 15 | 72568481  | 72568794  | 314 | 72568599  | 7  | 5.42458 |
| 15 | 73084728  | 73085048  | 321 | 73084818  | 8  | 6.50668 |
| 15 | 73399105  | 73399432  | 328 | 73399389  | 9  | 4.76787 |
| 15 | 82271119  | 82271419  | 301 | 82271307  | 7  | 4.65491 |
| 15 | 86248515  | 86248887  | 373 | 86248750  | 6  | 4.50291 |
| 15 | 86425363  | 86425685  | 323 | 86425451  | 6  | 3.98315 |
| 15 | 87254939  | 87255275  | 337 | 87255007  | 5  | 3.58241 |
| 15 | 87429744  | 87430070  | 327 | 87429947  | 5  | 3.58241 |
| 15 | 89327192  | 89327815  | 624 | 89327316  | 6  | 4.11516 |
| 15 | 91252483  | 91252959  | 477 | 91252818  | 10 | 5.41652 |
| 15 | 91733519  | 91733841  | 323 | 91733565  | 5  | 3.41441 |
| 15 | 94903137  | 94903528  | 392 | 94903370  | 10 | 8.69114 |
| 15 | 97482957  | 97483288  | 332 | 97483000  | 9  | 4.98189 |
| 15 | 103911880 | 103912230 | 351 | 103912035 | 8  | 6.50668 |
| 16 | 3638288   | 3638610   | 323 | 3638395   | 6  | 4.50291 |
| 16 | 3870242   | 3870602   | 361 | 3870352   | 5  | 3.49869 |
| 16 | 3887690   | 3888032   | 343 | 3887810   | 5  | 3.14499 |
| 16 | 6908130   | 6908680   | 551 | 6908483   | 5  | 3.58241 |
| 16 | 8286041   | 8286438   | 398 | 8286410   | 6  | 4.50291 |
| 16 | 9064232   | 9064552   | 321 | 9064275   | 5  | 3.58241 |

|    |          |          |     |          |    |         |
|----|----------|----------|-----|----------|----|---------|
| 16 | 11432049 | 11432376 | 328 | 11432250 | 8  | 5.39858 |
| 16 | 12397676 | 12397976 | 301 | 12397814 | 6  | 4.50291 |
| 16 | 19666568 | 19667061 | 494 | 19666718 | 5  | 3.58241 |
| 16 | 20847221 | 20847524 | 304 | 20847444 | 7  | 5.47978 |
| 16 | 23024166 | 23024506 | 341 | 23024426 | 5  | 3.1094  |
| 16 | 25557651 | 25557969 | 319 | 25557676 | 6  | 4.07032 |
| 16 | 25566630 | 25567034 | 405 | 25566673 | 7  | 5.47978 |
| 16 | 25992444 | 25992775 | 332 | 25992578 | 9  | 5.91748 |
| 16 | 26258362 | 26258686 | 325 | 26258530 | 8  | 6.50668 |
| 16 | 26855676 | 26856036 | 361 | 26855959 | 7  | 4.77975 |
| 16 | 27213449 | 27213776 | 328 | 27213476 | 8  | 3.28682 |
| 16 | 27603148 | 27603485 | 338 | 27603332 | 7  | 4.65491 |
| 16 | 37405233 | 37405588 | 356 | 37405492 | 5  | 3.37357 |
| 16 | 38912409 | 38912738 | 330 | 38912682 | 6  | 4.50291 |
| 16 | 39442398 | 39442724 | 327 | 39442527 | 7  | 5.47978 |
| 16 | 40241166 | 40241481 | 316 | 40241288 | 5  | 3.58241 |
| 16 | 40802086 | 40802398 | 313 | 40802101 | 6  | 3.66421 |
| 16 | 41069998 | 41070308 | 311 | 41070258 | 6  | 4.35303 |
| 16 | 42329144 | 42329578 | 435 | 42329231 | 6  | 3.79171 |
| 16 | 45375575 | 45375935 | 361 | 45375831 | 6  | 3.79171 |
| 16 | 46219953 | 46220262 | 310 | 46219961 | 5  | 3.41441 |
| 16 | 46220841 | 46221180 | 340 | 46220965 | 6  | 4.07032 |
| 16 | 47688299 | 47688646 | 348 | 47688450 | 7  | 5.47978 |
| 16 | 48495649 | 48495965 | 317 | 48495653 | 7  | 3.45771 |
| 16 | 48675917 | 48676235 | 319 | 48676061 | 7  | 5.30623 |
| 16 | 48865988 | 48866343 | 356 | 48866126 | 7  | 5.47978 |
| 16 | 50344480 | 50344868 | 389 | 50344645 | 10 | 7.31225 |
| 16 | 50667874 | 50668178 | 305 | 50667976 | 6  | 4.02633 |
| 16 | 51026197 | 51026510 | 314 | 51026297 | 7  | 4.68558 |
| 16 | 51315923 | 51316234 | 312 | 51315977 | 5  | 3.58241 |
| 16 | 51413857 | 51414170 | 314 | 51414154 | 6  | 4.50291 |
| 16 | 51473489 | 51473826 | 338 | 51473570 | 5  | 3.58241 |
| 16 | 51604785 | 51605218 | 434 | 51605038 | 5  | 3.58241 |
| 16 | 52788138 | 52788517 | 380 | 52788258 | 8  | 6.50668 |
| 16 | 53124730 | 53125073 | 344 | 53124921 | 7  | 5.47978 |
| 16 | 53484795 | 53485119 | 325 | 53484912 | 5  | 3.18126 |
| 16 | 53561161 | 53561510 | 350 | 53561251 | 5  | 3.58241 |
| 16 | 53690794 | 53691129 | 336 | 53690976 | 8  | 5.56774 |
| 16 | 57590329 | 57590651 | 323 | 57590557 | 7  | 4.97847 |
| 16 | 58825003 | 58825349 | 347 | 58825089 | 8  | 6.05599 |
| 16 | 58858988 | 58859321 | 334 | 58859117 | 6  | 4.45522 |
| 16 | 58982684 | 58983014 | 331 | 58982782 | 6  | 4.50291 |
| 16 | 59007550 | 59007882 | 333 | 59007867 | 6  | 3.79171 |
| 16 | 59124832 | 59125210 | 379 | 59125041 | 8  | 6.18019 |
| 16 | 60595179 | 60595505 | 327 | 60595411 | 7  | 4.65491 |
| 16 | 61516609 | 61516941 | 333 | 61516771 | 6  | 4.50291 |
| 16 | 61699457 | 61699778 | 322 | 61699499 | 6  | 3.79171 |
| 16 | 62705640 | 62706045 | 406 | 62705868 | 8  | 4.19779 |

|    |          |          |     |          |    |          |
|----|----------|----------|-----|----------|----|----------|
| 16 | 62883669 | 62884018 | 350 | 62883913 | 5  | 3.58241  |
| 16 | 63110697 | 63111041 | 345 | 63110773 | 6  | 3.79171  |
| 16 | 63407754 | 63408079 | 326 | 63407836 | 8  | 5.39858  |
| 16 | 63881333 | 63881709 | 377 | 63881555 | 7  | 4.92742  |
| 16 | 64071739 | 64072140 | 402 | 64071765 | 6  | 3.79171  |
| 16 | 64474998 | 64475332 | 335 | 64475277 | 9  | 6.33515  |
| 16 | 64481816 | 64482154 | 339 | 64482045 | 6  | 4.50291  |
| 16 | 65157596 | 65157905 | 310 | 65157628 | 6  | 4.45522  |
| 16 | 65442742 | 65443091 | 350 | 65442789 | 6  | 4.25501  |
| 16 | 65875309 | 65875654 | 346 | 65875613 | 5  | 3.41441  |
| 16 | 66410390 | 66410740 | 351 | 66410568 | 6  | 4.50291  |
| 16 | 69349302 | 69349624 | 323 | 69349622 | 6  | 3.02469  |
| 16 | 69420163 | 69420477 | 315 | 69420454 | 6  | 3.98315  |
| 16 | 69963863 | 69964178 | 316 | 69963881 | 5  | 3.58241  |
| 16 | 70231649 | 70231968 | 320 | 70231739 | 5  | 3.37357  |
| 16 | 70350958 | 70351287 | 330 | 70350987 | 7  | 4.10626  |
| 16 | 72743544 | 72743873 | 330 | 72743569 | 5  | 3.58241  |
| 16 | 72830031 | 72830364 | 334 | 72830334 | 6  | 4.50291  |
| 16 | 73999934 | 74000381 | 448 | 74000343 | 5  | 3.21823  |
| 16 | 79048945 | 79049257 | 313 | 79049041 | 6  | 4.50291  |
| 16 | 79422215 | 79422572 | 358 | 79422379 | 7  | 4.65491  |
| 16 | 80821005 | 80821310 | 306 | 80821072 | 7  | 3.45771  |
| 16 | 81226430 | 81226811 | 382 | 81226519 | 6  | 4.50291  |
| 16 | 81867324 | 81867663 | 340 | 81867363 | 7  | 4.87731  |
| 16 | 82344644 | 82345105 | 462 | 82344759 | 6  | 4.50291  |
| 16 | 82579628 | 82580047 | 420 | 82579969 | 6  | 4.50291  |
| 16 | 83221581 | 83221953 | 373 | 83221655 | 7  | 5.0835   |
| 16 | 83620510 | 83621033 | 524 | 83620812 | 8  | 5.87829  |
| 16 | 84385184 | 84385551 | 368 | 84385277 | 11 | 8.55855  |
| 16 | 84670281 | 84670814 | 534 | 84670529 | 7  | 5.30623  |
| 16 | 85536818 | 85537133 | 316 | 85536985 | 5  | 3.1094   |
| 16 | 85789034 | 85789452 | 419 | 85789075 | 6  | 3.66421  |
| 16 | 88166560 | 88166971 | 412 | 88166889 | 5  | 3.58241  |
| 16 | 93620366 | 93620682 | 317 | 93620397 | 5  | 3.58241  |
| 16 | 94924303 | 94924717 | 415 | 94924630 | 6  | 3.79171  |
| 17 | 3788235  | 3788594  | 360 | 3788563  | 5  | 3.58241  |
| 17 | 6485772  | 6486089  | 318 | 6485997  | 6  | 3.3206   |
| 17 | 6921086  | 6921446  | 361 | 6921292  | 8  | 3.28682  |
| 17 | 7103730  | 7104057  | 328 | 7103955  | 6  | 4.02633  |
| 17 | 8382018  | 8382376  | 359 | 8382355  | 6  | 3.79171  |
| 17 | 8936775  | 8937141  | 367 | 8936863  | 8  | 5.56774  |
| 17 | 9030807  | 9031193  | 387 | 9031082  | 29 | 29.19179 |
| 17 | 13400283 | 13400633 | 351 | 13400369 | 6  | 3.35262  |
| 17 | 13589918 | 13590577 | 660 | 13590476 | 87 | 7.96078  |
| 17 | 17991975 | 17992604 | 630 | 17992318 | 6  | 4.35303  |
| 17 | 18036340 | 18036711 | 372 | 18036685 | 6  | 4.25501  |
| 17 | 18695176 | 18696105 | 930 | 18695846 | 7  | 5.47978  |
| 17 | 18825241 | 18825594 | 354 | 18825261 | 5  | 3.07446  |

|    |          |          |      |          |     |           |
|----|----------|----------|------|----------|-----|-----------|
| 17 | 19365241 | 19365855 | 615  | 19365443 | 7   | 5.42458   |
| 17 | 20192507 | 20192833 | 327  | 20192755 | 9   | 6.74692   |
| 17 | 20445837 | 20446192 | 356  | 20445980 | 6   | 4.50291   |
| 17 | 20475811 | 20476134 | 324  | 20476104 | 9   | 3.94891   |
| 17 | 20510741 | 20511159 | 419  | 20511035 | 9   | 6.52524   |
| 17 | 22634372 | 22634703 | 332  | 22634551 | 6   | 3.79171   |
| 17 | 22699710 | 22700041 | 332  | 22699938 | 8   | 6.50668   |
| 17 | 22793566 | 22793894 | 329  | 22793851 | 7   | 4.50662   |
| 17 | 22856680 | 22857271 | 592  | 22856824 | 5   | 3.58241   |
| 17 | 33016996 | 33017338 | 343  | 33017279 | 6   | 3.79171   |
| 17 | 36427208 | 36427757 | 550  | 36427663 | 6   | 4.50291   |
| 17 | 36438602 | 36438980 | 379  | 36438721 | 7   | 3.45771   |
| 17 | 36552734 | 36553117 | 384  | 36552924 | 7   | 5.47978   |
| 17 | 37337716 | 37338042 | 327  | 37337856 | 7   | 4.50662   |
| 17 | 37463313 | 37463621 | 309  | 37463517 | 6   | 4.35303   |
| 17 | 37803292 | 37803618 | 327  | 37803495 | 6   | 3.66421   |
| 17 | 37907407 | 37907819 | 413  | 37907564 | 7   | 5.24887   |
| 17 | 38210358 | 38210699 | 342  | 38210522 | 8   | 5.56774   |
| 17 | 38828816 | 38829213 | 398  | 38829144 | 9   | 3.19498   |
| 17 | 39037647 | 39037989 | 343  | 39037936 | 6   | 3.79171   |
| 17 | 39740280 | 39740591 | 312  | 39740282 | 5   | 3.58241   |
| 17 | 39846657 | 39848022 | 1366 | 39847077 | 440 | 168.01476 |
| 17 | 40443691 | 40444008 | 318  | 40443900 | 7   | 5.19265   |
| 17 | 40983877 | 40984196 | 320  | 40984046 | 8   | 6.50668   |
| 17 | 41329231 | 41329539 | 309  | 41329535 | 6   | 4.07032   |
| 17 | 41942774 | 41943228 | 455  | 41942970 | 7   | 4.18152   |
| 17 | 42431609 | 42431944 | 336  | 42431627 | 7   | 4.5946    |
| 17 | 43407311 | 43407649 | 339  | 43407480 | 8   | 4.19779   |
| 17 | 44916616 | 44916942 | 327  | 44916724 | 8   | 5.56774   |
| 17 | 49941009 | 49941470 | 462  | 49941350 | 31  | 37.9639   |
| 17 | 50076457 | 50076975 | 519  | 50076626 | 8   | 5.93643   |
| 17 | 51350087 | 51350423 | 337  | 51350199 | 7   | 5.47978   |
| 17 | 52412766 | 52413129 | 364  | 52412826 | 6   | 4.20747   |
| 17 | 53099088 | 53099642 | 555  | 53099163 | 7   | 4.65491   |
| 17 | 53181957 | 53182471 | 515  | 53182031 | 5   | 3.58241   |
| 17 | 55628365 | 55628666 | 302  | 55628451 | 5   | 3.58241   |
| 17 | 55753275 | 55753670 | 396  | 55753337 | 5   | 3.07446   |
| 17 | 57435616 | 57435971 | 356  | 57435901 | 7   | 5.42458   |
| 17 | 57543747 | 57544050 | 304  | 57543870 | 9   | 7.28429   |
| 17 | 58364099 | 58364460 | 362  | 58364182 | 5   | 3.58241   |
| 17 | 58742967 | 58743323 | 357  | 58743262 | 5   | 3.58241   |
| 17 | 59222004 | 59222354 | 351  | 59222022 | 7   | 4.50662   |
| 17 | 60087469 | 60087776 | 308  | 60087602 | 7   | 5.47978   |
| 17 | 60112953 | 60113320 | 368  | 60113295 | 8   | 3.28682   |
| 17 | 60986009 | 60986523 | 515  | 60986061 | 6   | 4.40359   |
| 17 | 61285073 | 61285453 | 381  | 61285310 | 7   | 4.87731   |
| 17 | 62906864 | 62907186 | 323  | 62907031 | 6   | 3.66421   |
| 17 | 62960216 | 62960556 | 341  | 62960327 | 6   | 3.41811   |



|    |          |          |      |          |    |          |
|----|----------|----------|------|----------|----|----------|
| 17 | 63217080 | 63217381 | 302  | 63217200 | 7  | 4.06945  |
| 17 | 63714116 | 63714438 | 323  | 63714225 | 8  | 4.40106  |
| 17 | 65303220 | 65303829 | 610  | 65303759 | 7  | 5.36479  |
| 17 | 65530511 | 65530830 | 320  | 65530578 | 5  | 3.21823  |
| 17 | 67176500 | 67177209 | 710  | 67177058 | 6  | 3.79171  |
| 17 | 68047141 | 68047458 | 318  | 68047251 | 5  | 3.21823  |
| 17 | 68491179 | 68491550 | 372  | 68491474 | 5  | 3.58241  |
| 17 | 69964318 | 69964644 | 327  | 69964356 | 7  | 5.0835   |
| 17 | 69991766 | 69992086 | 321  | 69991836 | 10 | 7.07319  |
| 17 | 70112517 | 70112846 | 330  | 70112539 | 5  | 3.58241  |
| 17 | 70550442 | 70550923 | 482  | 70550750 | 7  | 5.03049  |
| 17 | 72225969 | 72226348 | 380  | 72226125 | 12 | 7.56208  |
| 17 | 76761913 | 76762295 | 383  | 76762011 | 7  | 5.47978  |
| 17 | 76902559 | 76903101 | 543  | 76902851 | 8  | 5.56774  |
| 17 | 77588359 | 77588757 | 399  | 77588693 | 9  | 7.57852  |
| 17 | 77922470 | 77922828 | 359  | 77922505 | 5  | 3.5422   |
| 17 | 79087339 | 79088351 | 1013 | 79088237 | 11 | 8.60648  |
| 17 | 80730359 | 80730673 | 315  | 80730459 | 6  | 4.11516  |
| 17 | 81436440 | 81436973 | 534  | 81436446 | 6  | 3.3206   |
| 17 | 82106621 | 82106942 | 322  | 82106774 | 7  | 4.82809  |
| 17 | 82230184 | 82230550 | 367  | 82230224 | 6  | 4.50291  |
| 17 | 82338256 | 82338621 | 366  | 82338345 | 5  | 3.58241  |
| 17 | 82363617 | 82363973 | 357  | 82363670 | 6  | 4.50291  |
| 17 | 82387171 | 82387489 | 319  | 82387365 | 5  | 3.14499  |
| 17 | 82797010 | 82797317 | 308  | 82797012 | 6  | 3.79171  |
| 17 | 82935970 | 82936340 | 371  | 82936282 | 6  | 4.50291  |
| 17 | 86177283 | 86177844 | 562  | 86177432 | 6  | 4.35303  |
| 17 | 89080361 | 89080719 | 359  | 89080425 | 6  | 4.25501  |
| 17 | 89334135 | 89334618 | 484  | 89334418 | 6  | 4.50291  |
| 17 | 89453535 | 89453843 | 309  | 89453558 | 7  | 4.10626  |
| 17 | 89827107 | 89827580 | 474  | 89827420 | 6  | 3.79171  |
| 17 | 90329498 | 90329805 | 308  | 90329627 | 7  | 4.25906  |
| 17 | 90497337 | 90497654 | 318  | 90497465 | 5  | 3.58241  |
| 17 | 90538203 | 90538597 | 395  | 90538266 | 7  | 4.97847  |
| 17 | 91127911 | 91128486 | 576  | 91128372 | 6  | 4.02633  |
| 17 | 92218006 | 92218330 | 325  | 92218048 | 7  | 4.77975  |
| 17 | 93346871 | 93347254 | 384  | 93346914 | 7  | 3.72842  |
| 17 | 93662483 | 93663017 | 535  | 93662697 | 7  | 3.45771  |
| 17 | 93829925 | 93830238 | 314  | 93830143 | 5  | 3.37357  |
| 17 | 93912688 | 93913022 | 335  | 93912856 | 8  | 6.50668  |
| 18 | 3132380  | 3132697  | 318  | 3132566  | 8  | 6.50668  |
| 18 | 14913685 | 14914141 | 457  | 14913941 | 29 | 30.86135 |
| 18 | 17466995 | 17467308 | 314  | 17467025 | 8  | 5.39858  |
| 18 | 17542226 | 17542557 | 332  | 17542280 | 6  | 3.79171  |
| 18 | 18831280 | 18831596 | 317  | 18831451 | 11 | 8.90566  |
| 18 | 24677180 | 24677484 | 305  | 24677334 | 18 | 18.73404 |
| 18 | 26521116 | 26521560 | 445  | 26521414 | 7  | 5.47978  |
| 18 | 29011152 | 29011465 | 314  | 29011202 | 6  | 4.07032  |

|    |          |          |     |          |     |           |
|----|----------|----------|-----|----------|-----|-----------|
| 18 | 29243750 | 29244246 | 497 | 29244066 | 6   | 3.98315   |
| 18 | 29405013 | 29405606 | 594 | 29405425 | 7   | 5.47978   |
| 18 | 37632455 | 37632833 | 379 | 37632549 | 6   | 4.50291   |
| 18 | 40780283 | 40780592 | 310 | 40780407 | 6   | 4.50291   |
| 18 | 42558015 | 42558733 | 719 | 42558440 | 51  | 60.05621  |
| 18 | 43651258 | 43651588 | 331 | 43651266 | 5   | 3.4561    |
| 18 | 44278317 | 44278622 | 306 | 44278602 | 6   | 3.66421   |
| 18 | 44343209 | 44343576 | 368 | 44343338 | 10  | 3.80233   |
| 18 | 44701649 | 44701985 | 337 | 44701782 | 7   | 3.99741   |
| 18 | 47390246 | 47390596 | 351 | 47390308 | 7   | 4.65491   |
| 18 | 47450374 | 47450680 | 307 | 47450468 | 6   | 4.50291   |
| 18 | 59510337 | 59510648 | 312 | 59510423 | 9   | 6.52524   |
| 18 | 62621270 | 62621656 | 387 | 62621464 | 8   | 6.50668   |
| 18 | 75887724 | 75888025 | 302 | 75887808 | 5   | 3.4561    |
| 18 | 78483613 | 78483953 | 341 | 78483763 | 8   | 5.39858   |
| 18 | 83262030 | 83262359 | 330 | 83262069 | 7   | 5.47978   |
| 18 | 85872631 | 85873095 | 465 | 85872768 | 5   | 3.58241   |
| 18 | 86533102 | 86533456 | 355 | 86533245 | 6   | 4.50291   |
| 18 | 88375058 | 88375371 | 314 | 88375271 | 6   | 4.50291   |
| 18 | 90246994 | 90247323 | 330 | 90247116 | 6   | 4.50291   |
| 19 | 5444470  | 5444938  | 469 | 5444490  | 5   | 3.58241   |
| 19 | 7946256  | 7946557  | 302 | 7946390  | 7   | 4.65491   |
| 19 | 8056986  | 8057364  | 379 | 8057232  | 6   | 3.8181    |
| 19 | 8246733  | 8247068  | 336 | 8246746  | 8   | 5.39858   |
| 19 | 11157389 | 11157724 | 336 | 11157405 | 5   | 3.49869   |
| 19 | 11250285 | 11250602 | 318 | 11250334 | 7   | 5.47978   |
| 19 | 12098134 | 12098499 | 366 | 12098184 | 7   | 5.47978   |
| 19 | 12822079 | 12822385 | 307 | 12822222 | 6   | 4.50291   |
| 19 | 17598153 | 17598472 | 320 | 17598359 | 7   | 5.47978   |
| 19 | 17799242 | 17799737 | 496 | 17799434 | 6   | 4.50291   |
| 19 | 18008133 | 18008509 | 377 | 18008167 | 5   | 3.58241   |
| 19 | 18510777 | 18511182 | 406 | 18510812 | 6   | 4.50291   |
| 19 | 20559164 | 20559566 | 403 | 20559356 | 7   | 5.19265   |
| 19 | 22215342 | 22215648 | 307 | 22215391 | 6   | 4.40359   |
| 19 | 23470037 | 23470368 | 332 | 23470061 | 5   | 3.58241   |
| 19 | 23689928 | 23690325 | 398 | 23690212 | 6   | 3.79171   |
| 19 | 27132420 | 27132742 | 323 | 27132582 | 6   | 3.79171   |
| 19 | 27824010 | 27824363 | 354 | 27824088 | 6   | 4.35303   |
| 19 | 29444748 | 29445082 | 335 | 29445071 | 7   | 3.76048   |
| 19 | 31062865 | 31063189 | 325 | 31062879 | 5   | 3.58241   |
| 19 | 33722882 | 33723212 | 331 | 33723025 | 8   | 5.93643   |
| 19 | 38474749 | 38475056 | 308 | 38474888 | 6   | 4.35303   |
| 19 | 39641239 | 39641561 | 323 | 39641396 | 6   | 4.50291   |
| 19 | 39838988 | 39839321 | 334 | 39839194 | 6   | 4.50291   |
| 19 | 40508441 | 40508855 | 415 | 40508726 | 107 | 169.49567 |
| 19 | 43417588 | 43418100 | 513 | 43417957 | 6   | 3.89915   |
| 19 | 50231119 | 50231488 | 370 | 50231195 | 7   | 5.47978   |
| 19 | 50787004 | 50787404 | 401 | 50787235 | 6   | 4.02633   |

|    |          |          |     |          |    |         |
|----|----------|----------|-----|----------|----|---------|
| 19 | 53731901 | 53732235 | 335 | 53732198 | 7  | 3.76048 |
| 19 | 55139426 | 55139735 | 310 | 55139645 | 6  | 4.50291 |
| 19 | 56243553 | 56243853 | 301 | 56243699 | 6  | 4.50291 |
| 19 | 58634808 | 58635138 | 331 | 58635012 | 6  | 4.07032 |
| 19 | 61293924 | 61294228 | 305 | 61294076 | 6  | 4.50291 |
| 19 | 61314492 | 61314879 | 388 | 61314819 | 6  | 3.79171 |
| 2  | 4208018  | 4208317  | 300 | 4208176  | 8  | 6.50668 |
| 2  | 4748271  | 4748662  | 392 | 4748540  | 5  | 3.41441 |
| 2  | 6889044  | 6889351  | 308 | 6889208  | 6  | 4.50291 |
| 2  | 8598995  | 8599464  | 470 | 8599317  | 6  | 4.50291 |
| 2  | 8655377  | 8655788  | 412 | 8655449  | 7  | 5.47978 |
| 2  | 10679395 | 10679746 | 352 | 10679651 | 5  | 3.58241 |
| 2  | 13926685 | 13927052 | 368 | 13926845 | 5  | 3.58241 |
| 2  | 14939506 | 14939881 | 376 | 14939572 | 7  | 5.47978 |
| 2  | 19481157 | 19481494 | 338 | 19481222 | 7  | 5.47978 |
| 2  | 22107228 | 22107546 | 319 | 22107241 | 6  | 3.79171 |
| 2  | 23145900 | 23146213 | 314 | 23145910 | 7  | 3.1897  |
| 2  | 23276349 | 23276748 | 400 | 23276660 | 6  | 4.50291 |
| 2  | 31706100 | 31706479 | 380 | 31706296 | 5  | 3.41441 |
| 2  | 34516454 | 34516868 | 415 | 34516605 | 8  | 6.50668 |
| 2  | 37040925 | 37041249 | 325 | 37040976 | 5  | 3.58241 |
| 2  | 39779435 | 39779816 | 382 | 39779581 | 9  | 7.57852 |
| 2  | 40551888 | 40552218 | 331 | 40552016 | 6  | 4.25501 |
| 2  | 42209962 | 42210369 | 408 | 42210012 | 7  | 4.65491 |
| 2  | 42678860 | 42679231 | 372 | 42678887 | 5  | 3.58241 |
| 2  | 43360341 | 43360845 | 505 | 43360500 | 7  | 5.47978 |
| 2  | 44072643 | 44073144 | 502 | 44072908 | 7  | 5.47978 |
| 2  | 44722114 | 44722424 | 311 | 44722156 | 7  | 5.19265 |
| 2  | 45796554 | 45797089 | 536 | 45796569 | 6  | 4.50291 |
| 2  | 46175295 | 46175635 | 341 | 46175342 | 6  | 4.07032 |
| 2  | 46192741 | 46193070 | 330 | 46192807 | 7  | 5.47978 |
| 2  | 46570742 | 46571093 | 352 | 46570868 | 7  | 5.47978 |
| 2  | 53226482 | 53226799 | 318 | 53226608 | 8  | 4.19779 |
| 2  | 53312868 | 53313245 | 378 | 53312911 | 6  | 4.50291 |
| 2  | 53664296 | 53664657 | 362 | 53664441 | 9  | 4.98189 |
| 2  | 55122690 | 55123023 | 334 | 55122728 | 6  | 4.50291 |
| 2  | 56162690 | 56163037 | 348 | 56162806 | 7  | 5.24887 |
| 2  | 56771793 | 56772159 | 367 | 56772018 | 6  | 4.50291 |
| 2  | 57296837 | 57297137 | 301 | 57296885 | 6  | 4.30352 |
| 2  | 62547426 | 62547949 | 524 | 62547898 | 7  | 5.19265 |
| 2  | 63734199 | 63734581 | 383 | 63734489 | 5  | 3.04015 |
| 2  | 65676896 | 65677202 | 307 | 65677198 | 7  | 3.45771 |
| 2  | 65982410 | 65982753 | 344 | 65982555 | 5  | 3.58241 |
| 2  | 66010223 | 66010551 | 329 | 66010252 | 6  | 3.73984 |
| 2  | 66312787 | 66313121 | 335 | 66312900 | 8  | 5.56774 |
| 2  | 66584181 | 66584485 | 305 | 66584270 | 11 | 8.25921 |
| 2  | 66808854 | 66809218 | 365 | 66809103 | 7  | 5.0835  |
| 2  | 67716757 | 67717060 | 304 | 67716823 | 5  | 3.58241 |

|   |           |           |     |           |       |           |
|---|-----------|-----------|-----|-----------|-------|-----------|
| 2 | 68940324  | 68940712  | 389 | 68940497  | 6     | 3.85827   |
| 2 | 72699736  | 72700229  | 494 | 72700084  | 6     | 3.66421   |
| 2 | 75534886  | 75535260  | 375 | 75534894  | 6     | 3.79171   |
| 2 | 77153826  | 77154194  | 369 | 77154119  | 7     | 4.97847   |
| 2 | 78521995  | 78522368  | 374 | 78522199  | 9     | 6.52524   |
| 2 | 79902583  | 79902906  | 324 | 79902623  | 7     | 4.97847   |
| 2 | 79904539  | 79904935  | 397 | 79904705  | 9     | 6.68507   |
| 2 | 82388828  | 82389245  | 418 | 82389049  | 7     | 5.47978   |
| 2 | 83062805  | 83063116  | 312 | 83062894  | 8     | 4.77631   |
| 2 | 83851604  | 83851973  | 370 | 83851870  | 5     | 3.29435   |
| 2 | 84043496  | 84043824  | 329 | 84043527  | 7     | 5.19265   |
| 2 | 87073208  | 87073528  | 321 | 87073363  | 5     | 3.58241   |
| 2 | 87691927  | 87692263  | 337 | 87692200  | 6     | 4.50291   |
| 2 | 87818060  | 87818410  | 351 | 87818063  | 6     | 3.79171   |
| 2 | 88509948  | 88510293  | 346 | 88510014  | 5     | 3.58241   |
| 2 | 88562193  | 88562496  | 304 | 88562218  | 6     | 4.45522   |
| 2 | 89561436  | 89561764  | 329 | 89561440  | 6     | 4.20747   |
| 2 | 89678306  | 89678723  | 418 | 89678341  | 5     | 3.58241   |
| 2 | 89812032  | 89812646  | 615 | 89812158  | 6     | 4.50291   |
| 2 | 89983304  | 89983817  | 514 | 89983521  | 6     | 4.50291   |
| 2 | 93458231  | 93458566  | 336 | 93458500  | 7     | 4.10626   |
| 2 | 95290844  | 95291176  | 333 | 95290889  | 5     | 3.58241   |
| 2 | 95379720  | 95380080  | 361 | 95379839  | 6     | 4.30352   |
| 2 | 95580791  | 95581309  | 519 | 95580898  | 7     | 4.65491   |
| 2 | 96511235  | 96511670  | 436 | 96511547  | 6     | 4.50291   |
| 2 | 97216287  | 97216611  | 325 | 97216445  | 7     | 4.68558   |
| 2 | 97907192  | 97907721  | 530 | 97907418  | 6     | 3.79171   |
| 2 | 97957147  | 97957803  | 657 | 97957584  | 6     | 4.50291   |
| 2 | 98459297  | 98459666  | 370 | 98459542  | 6     | 3.79171   |
| 2 | 98666699  | 98667220  | 522 | 98666857  | 27881 | 802.77637 |
| 2 | 100454011 | 100454347 | 337 | 100454237 | 6     | 4.50291   |
| 2 | 100950200 | 100950506 | 307 | 100950279 | 6     | 4.50291   |
| 2 | 100957753 | 100958108 | 356 | 100957976 | 8     | 5.56774   |
| 2 | 104088727 | 104089065 | 339 | 104088738 | 8     | 3.28682   |
| 2 | 104296724 | 104297165 | 442 | 104296851 | 5     | 3.58241   |
| 2 | 104424423 | 104424782 | 360 | 104424662 | 6     | 4.02633   |
| 2 | 106325748 | 106326050 | 303 | 106325959 | 6     | 4.50291   |
| 2 | 107615865 | 107616179 | 315 | 107615969 | 7     | 5.47978   |
| 2 | 108560870 | 108561207 | 338 | 108561084 | 6     | 3.94077   |
| 2 | 111169851 | 111170186 | 336 | 111169993 | 6     | 4.50291   |
| 2 | 111703383 | 111703735 | 353 | 111703394 | 5     | 3.58241   |
| 2 | 113234782 | 113235148 | 367 | 113235118 | 6     | 4.50291   |
| 2 | 114212204 | 114212561 | 358 | 114212435 | 7     | 5.47978   |
| 2 | 122013593 | 122013922 | 330 | 122013726 | 10    | 6.58426   |
| 2 | 122919766 | 122920094 | 329 | 122919911 | 7     | 4.97847   |
| 2 | 122987775 | 122988082 | 308 | 122987980 | 7     | 4.65491   |
| 2 | 125112588 | 125113029 | 442 | 125112765 | 7     | 3.45771   |
| 2 | 125706502 | 125706827 | 326 | 125706566 | 7     | 5.03049   |

|   |           |           |     |           |    |          |
|---|-----------|-----------|-----|-----------|----|----------|
| 2 | 128244795 | 128245110 | 316 | 128245024 | 6  | 4.50291  |
| 2 | 130240769 | 130241435 | 667 | 130240784 | 6  | 3.66421  |
| 2 | 130759797 | 130760124 | 328 | 130759920 | 6  | 4.45522  |
| 2 | 132503645 | 132504430 | 786 | 132504147 | 6  | 4.50291  |
| 2 | 133081271 | 133081669 | 399 | 133081341 | 5  | 3.58241  |
| 2 | 134023049 | 134023409 | 361 | 134023225 | 7  | 5.47978  |
| 2 | 136866697 | 136867098 | 402 | 136867002 | 9  | 6.52524  |
| 2 | 137136982 | 137137340 | 359 | 137137165 | 5  | 3.58241  |
| 2 | 137943014 | 137943357 | 344 | 137943027 | 6  | 3.98315  |
| 2 | 138249245 | 138249627 | 383 | 138249330 | 8  | 4.19779  |
| 2 | 138729353 | 138729731 | 379 | 138729627 | 7  | 5.47978  |
| 2 | 139272704 | 139273022 | 319 | 139272890 | 7  | 5.42458  |
| 2 | 139472569 | 139472897 | 329 | 139472683 | 6  | 4.45522  |
| 2 | 140232463 | 140232792 | 330 | 140232659 | 5  | 3.33356  |
| 2 | 140290946 | 140291484 | 539 | 140291205 | 9  | 5.91748  |
| 2 | 141260850 | 141261162 | 313 | 141261064 | 8  | 5.56774  |
| 2 | 142575645 | 142575953 | 309 | 142575828 | 6  | 4.50291  |
| 2 | 143769906 | 143770426 | 521 | 143770233 | 6  | 3.79171  |
| 2 | 148103970 | 148104277 | 308 | 148104033 | 6  | 4.50291  |
| 2 | 150047285 | 150047677 | 393 | 150047608 | 7  | 5.47978  |
| 2 | 153236650 | 153237028 | 379 | 153236735 | 8  | 6.50668  |
| 2 | 154296002 | 154296336 | 335 | 154296098 | 6  | 4.02633  |
| 2 | 155202985 | 155203333 | 349 | 155203211 | 9  | 7.57852  |
| 2 | 159786784 | 159787230 | 447 | 159787147 | 7  | 4.65491  |
| 2 | 160776013 | 160776356 | 344 | 160776304 | 7  | 5.47978  |
| 2 | 163350617 | 163350949 | 333 | 163350810 | 7  | 5.47978  |
| 2 | 170606263 | 170606830 | 568 | 170606286 | 6  | 3.79171  |
| 2 | 173835342 | 173835652 | 311 | 173835451 | 6  | 4.50291  |
| 2 | 178006762 | 178007097 | 336 | 178006765 | 6  | 3.3206   |
| 2 | 178395797 | 178396170 | 374 | 178395902 | 8  | 4.98393  |
| 3 | 4007593   | 4007908   | 316 | 4007757   | 6  | 4.50291  |
| 3 | 4207903   | 4208368   | 466 | 4208111   | 5  | 3.07446  |
| 3 | 4222554   | 4222904   | 351 | 4222772   | 6  | 3.89915  |
| 3 | 4825568   | 4825909   | 342 | 4825753   | 5  | 3.41441  |
| 3 | 6485508   | 6485841   | 334 | 6485811   | 6  | 4.40359  |
| 3 | 6972902   | 6973268   | 367 | 6973161   | 6  | 4.50291  |
| 3 | 8567164   | 8567486   | 323 | 8567387   | 6  | 4.50291  |
| 3 | 9225090   | 9225449   | 360 | 9225256   | 9  | 6.52524  |
| 3 | 11620776  | 11621087  | 312 | 11620886  | 7  | 5.0835   |
| 3 | 11714847  | 11715168  | 322 | 11714862  | 5  | 3.58241  |
| 3 | 12416608  | 12416922  | 315 | 12416683  | 5  | 3.58241  |
| 3 | 13918505  | 13918897  | 393 | 13918822  | 7  | 4.65491  |
| 3 | 15036287  | 15036625  | 339 | 15036365  | 6  | 3.85827  |
| 3 | 16603257  | 16603564  | 308 | 16603395  | 7  | 4.97847  |
| 3 | 17976586  | 17976904  | 319 | 17976758  | 8  | 6.50668  |
| 3 | 19866643  | 19867074  | 432 | 19866849  | 38 | 44.85554 |
| 3 | 23278707  | 23279066  | 360 | 23278724  | 5  | 3.58241  |
| 3 | 24772059  | 24772378  | 320 | 24772078  | 5  | 3.21823  |

|   |          |          |     |          |   |         |
|---|----------|----------|-----|----------|---|---------|
| 3 | 25157351 | 25157677 | 327 | 25157411 | 8 | 6.05599 |
| 3 | 29715993 | 29716620 | 628 | 29716151 | 8 | 6.50668 |
| 3 | 34123472 | 34123805 | 334 | 34123775 | 6 | 4.50291 |
| 3 | 34247789 | 34248144 | 356 | 34248009 | 5 | 3.58241 |
| 3 | 35138185 | 35138485 | 301 | 35138396 | 6 | 4.50291 |
| 3 | 36025042 | 36025359 | 318 | 36025166 | 9 | 6.93917 |
| 3 | 44363058 | 44363363 | 306 | 44363132 | 7 | 3.76048 |
| 3 | 44464197 | 44464553 | 357 | 44464453 | 6 | 3.85827 |
| 3 | 45171049 | 45171418 | 370 | 45171337 | 7 | 4.37991 |
| 3 | 45357644 | 45358017 | 374 | 45357713 | 6 | 4.02633 |
| 3 | 45665274 | 45665673 | 400 | 45665392 | 6 | 4.30352 |
| 3 | 45694242 | 45694596 | 355 | 45694562 | 7 | 5.30623 |
| 3 | 46088784 | 46089158 | 375 | 46088943 | 8 | 6.50668 |
| 3 | 46590812 | 46591122 | 311 | 46590954 | 5 | 3.4561  |
| 3 | 46684373 | 46684713 | 341 | 46684676 | 6 | 3.66421 |
| 3 | 47185666 | 47186007 | 342 | 47185682 | 7 | 4.50662 |
| 3 | 49732940 | 49733287 | 348 | 49732994 | 8 | 5.56774 |
| 3 | 50653675 | 50653976 | 302 | 50653790 | 7 | 3.45771 |
| 3 | 50950317 | 50950675 | 359 | 50950518 | 6 | 4.50291 |
| 3 | 52359120 | 52359424 | 305 | 52359318 | 7 | 5.47978 |
| 3 | 53100093 | 53100434 | 342 | 53100297 | 6 | 4.02633 |
| 3 | 53513898 | 53514252 | 355 | 53514030 | 6 | 4.50291 |
| 3 | 56297421 | 56297764 | 344 | 56297564 | 6 | 4.50291 |
| 3 | 57084453 | 57084764 | 312 | 57084575 | 6 | 4.20747 |
| 3 | 59265852 | 59266325 | 474 | 59266052 | 6 | 4.50291 |
| 3 | 59463118 | 59463432 | 315 | 59463145 | 6 | 4.50291 |
| 3 | 59483130 | 59483462 | 333 | 59483306 | 7 | 3.45771 |
| 3 | 61231105 | 61231479 | 375 | 61231348 | 7 | 5.36479 |
| 3 | 62208976 | 62209313 | 338 | 62209151 | 7 | 4.92742 |
| 3 | 63661283 | 63661631 | 349 | 63661333 | 5 | 3.58241 |
| 3 | 63764275 | 63764630 | 356 | 63764490 | 7 | 3.45771 |
| 3 | 67336841 | 67337181 | 341 | 67336894 | 8 | 6.44394 |
| 3 | 67431186 | 67431500 | 315 | 67431285 | 6 | 4.20747 |
| 3 | 68547932 | 68548234 | 303 | 68548024 | 8 | 6.50668 |
| 3 | 71904937 | 71905268 | 332 | 71905023 | 7 | 4.73225 |
| 3 | 72010109 | 72010412 | 304 | 72010216 | 7 | 5.47978 |
| 3 | 72017834 | 72018140 | 307 | 72018057 | 8 | 5.25394 |
| 3 | 72226255 | 72226564 | 310 | 72226461 | 8 | 6.30939 |
| 3 | 73257279 | 73257626 | 348 | 73257380 | 6 | 3.79171 |
| 3 | 74583961 | 74584275 | 315 | 74584033 | 6 | 4.50291 |
| 3 | 75338260 | 75338605 | 346 | 75338505 | 5 | 3.58241 |
| 3 | 76037874 | 76038281 | 408 | 76037979 | 5 | 3.33356 |
| 3 | 76272670 | 76273043 | 374 | 76272918 | 7 | 5.42458 |
| 3 | 76333631 | 76334004 | 374 | 76333754 | 6 | 4.07032 |
| 3 | 76488097 | 76488421 | 325 | 76488183 | 5 | 3.58241 |
| 3 | 77041779 | 77042099 | 321 | 77042013 | 6 | 3.85827 |
| 3 | 77234667 | 77234966 | 300 | 77234912 | 7 | 5.42458 |
| 3 | 81485669 | 81486052 | 384 | 81485998 | 8 | 6.18019 |

|   |           |           |     |           |   |         |
|---|-----------|-----------|-----|-----------|---|---------|
| 3 | 81631312  | 81631652  | 341 | 81631406  | 6 | 3.48566 |
| 3 | 89705166  | 89705471  | 306 | 89705286  | 6 | 4.50291 |
| 3 | 90220238  | 90220610  | 373 | 90220359  | 9 | 7.57852 |
| 3 | 91181704  | 91182012  | 309 | 91181986  | 6 | 4.50291 |
| 3 | 91459240  | 91459561  | 322 | 91459297  | 6 | 4.20747 |
| 3 | 91984886  | 91985254  | 369 | 91985004  | 6 | 4.50291 |
| 3 | 92313318  | 92313736  | 419 | 92313635  | 8 | 4.19779 |
| 3 | 92446149  | 92446448  | 300 | 92446321  | 6 | 4.02633 |
| 3 | 92785366  | 92785712  | 347 | 92785672  | 5 | 3.58241 |
| 3 | 92811685  | 92812037  | 353 | 92811951  | 7 | 5.47978 |
| 3 | 93187032  | 93187537  | 506 | 93187103  | 5 | 3.58241 |
| 3 | 93315669  | 93315990  | 322 | 93315798  | 7 | 4.65491 |
| 3 | 94080916  | 94081237  | 322 | 94081004  | 6 | 3.79171 |
| 3 | 94215680  | 94216425  | 746 | 94215914  | 9 | 6.33515 |
| 3 | 98275889  | 98276213  | 325 | 98275934  | 6 | 4.50291 |
| 3 | 98592947  | 98593390  | 444 | 98593365  | 6 | 3.94077 |
| 3 | 99081140  | 99081515  | 376 | 99081374  | 7 | 5.47978 |
| 3 | 99906099  | 99906417  | 319 | 99906342  | 9 | 6.93917 |
| 3 | 99959399  | 99959765  | 367 | 99959687  | 5 | 3.58241 |
| 3 | 106315491 | 106315807 | 317 | 106315666 | 6 | 4.45522 |
| 3 | 109141872 | 109142298 | 427 | 109142198 | 6 | 4.35303 |
| 3 | 110681289 | 110681663 | 375 | 110681414 | 9 | 7.35743 |
| 3 | 111761977 | 111762304 | 328 | 111762148 | 7 | 5.47978 |
| 3 | 113351526 | 113351861 | 336 | 113351624 | 5 | 3.58241 |
| 3 | 113788520 | 113788821 | 302 | 113788718 | 7 | 5.47978 |
| 3 | 116763990 | 116764317 | 328 | 116764242 | 6 | 3.79171 |
| 3 | 117651762 | 117652106 | 345 | 117651821 | 5 | 3.58241 |
| 3 | 118096450 | 118096842 | 393 | 118096678 | 8 | 5.56774 |
| 3 | 118329598 | 118329909 | 312 | 118329695 | 5 | 3.58241 |
| 3 | 118719591 | 118719892 | 302 | 118719717 | 7 | 5.47978 |
| 3 | 120108186 | 120108506 | 321 | 120108248 | 8 | 6.50668 |
| 3 | 120280895 | 120281256 | 362 | 120280970 | 5 | 3.58241 |
| 3 | 121812616 | 121812922 | 307 | 121812643 | 7 | 3.76048 |
| 3 | 125338814 | 125339381 | 568 | 125338933 | 7 | 4.50662 |
| 3 | 125518525 | 125518999 | 475 | 125518584 | 6 | 4.50291 |
| 3 | 125614286 | 125614753 | 468 | 125614581 | 8 | 4.19779 |
| 3 | 127222239 | 127222584 | 346 | 127222377 | 5 | 3.58241 |
| 3 | 132850781 | 132851080 | 300 | 132851006 | 7 | 5.47978 |
| 3 | 134068275 | 134068607 | 333 | 134068287 | 5 | 3.58241 |
| 3 | 134451194 | 134451527 | 334 | 134451443 | 6 | 4.50291 |
| 3 | 134853168 | 134853555 | 388 | 134853502 | 6 | 4.50291 |
| 3 | 135193120 | 135193483 | 364 | 135193320 | 7 | 5.19265 |
| 3 | 139385287 | 139385676 | 390 | 139385330 | 7 | 4.65491 |
| 3 | 139634085 | 139634547 | 463 | 139634085 | 8 | 3.28682 |
| 3 | 140539883 | 140540232 | 350 | 140540177 | 5 | 3.07446 |
| 3 | 140745324 | 140745665 | 342 | 140745562 | 5 | 3.37357 |
| 3 | 141371632 | 141371958 | 327 | 141371910 | 6 | 3.22735 |
| 3 | 143195000 | 143195758 | 759 | 143195621 | 6 | 4.25501 |

|   |           |           |     |           |    |         |
|---|-----------|-----------|-----|-----------|----|---------|
| 3 | 144033739 | 144034069 | 331 | 144033956 | 9  | 4.98189 |
| 3 | 146075041 | 146075407 | 367 | 146075192 | 7  | 5.13754 |
| 3 | 148315396 | 148315762 | 367 | 148315423 | 5  | 3.14499 |
| 3 | 149575040 | 149575369 | 330 | 149575221 | 6  | 4.02633 |
| 3 | 150161201 | 150161538 | 338 | 150161474 | 7  | 5.13754 |
| 3 | 152101888 | 152102189 | 302 | 152101928 | 5  | 3.37357 |
| 3 | 152333987 | 152334289 | 303 | 152333989 | 5  | 3.58241 |
| 3 | 155173579 | 155173968 | 390 | 155173809 | 7  | 5.47978 |
| 3 | 155857632 | 155858013 | 382 | 155857934 | 8  | 6.50668 |
| 3 | 157801010 | 157801324 | 315 | 157801053 | 5  | 3.58241 |
| 3 | 158770858 | 158771182 | 325 | 158771067 | 6  | 4.50291 |
| 4 | 3130203   | 3130503   | 301 | 3130389   | 8  | 5.39858 |
| 4 | 3235468   | 3235803   | 336 | 3235574   | 10 | 4.63111 |
| 4 | 5394379   | 5394694   | 316 | 5394509   | 5  | 3.58241 |
| 4 | 5646411   | 5646796   | 386 | 5646535   | 10 | 8.69114 |
| 4 | 9937705   | 9938033   | 329 | 9937812   | 5  | 3.58241 |
| 4 | 10106053  | 10106436  | 384 | 10106254  | 7  | 3.45771 |
| 4 | 10393898  | 10394255  | 358 | 10394129  | 7  | 5.42458 |
| 4 | 13532048  | 13532385  | 338 | 13532317  | 5  | 3.21823 |
| 4 | 14399512  | 14399818  | 307 | 14399727  | 6  | 4.50291 |
| 4 | 16312826  | 16313137  | 312 | 16312901  | 5  | 3.58241 |
| 4 | 16320960  | 16321300  | 341 | 16321057  | 8  | 4.19779 |
| 4 | 17779968  | 17780317  | 350 | 17780249  | 8  | 5.56774 |
| 4 | 18714387  | 18714754  | 368 | 18714642  | 6  | 4.40359 |
| 4 | 19156467  | 19156768  | 302 | 19156474  | 7  | 5.47978 |
| 4 | 20064133  | 20064488  | 356 | 20064152  | 5  | 3.37357 |
| 4 | 20192887  | 20193237  | 351 | 20192947  | 7  | 5.47978 |
| 4 | 22485130  | 22485441  | 312 | 22485288  | 6  | 3.79171 |
| 4 | 24119050  | 24119358  | 309 | 24119262  | 7  | 4.97847 |
| 4 | 24196519  | 24196866  | 348 | 24196632  | 10 | 8.69114 |
| 4 | 25694510  | 25694827  | 318 | 25694706  | 6  | 4.50291 |
| 4 | 26244498  | 26244816  | 319 | 26244599  | 5  | 3.58241 |
| 4 | 27912680  | 27913068  | 389 | 27912830  | 5  | 3.58241 |
| 4 | 28272699  | 28273032  | 334 | 28272701  | 6  | 3.94077 |
| 4 | 29558188  | 29558542  | 355 | 29558388  | 7  | 4.82809 |
| 4 | 29746196  | 29746502  | 307 | 29746345  | 6  | 4.50291 |
| 4 | 30337422  | 30337746  | 325 | 30337526  | 9  | 5.37431 |
| 4 | 30935474  | 30935810  | 337 | 30935642  | 7  | 5.19265 |
| 4 | 31311937  | 31312525  | 589 | 31312218  | 7  | 4.77975 |
| 4 | 31478384  | 31478766  | 383 | 31478665  | 6  | 4.25501 |
| 4 | 32170159  | 32170503  | 345 | 32170202  | 6  | 3.79171 |
| 4 | 35841998  | 35842466  | 469 | 35842139  | 7  | 3.45771 |
| 4 | 39622831  | 39623151  | 321 | 39622837  | 5  | 3.58241 |
| 4 | 45234855  | 45235197  | 343 | 45234973  | 7  | 5.24887 |
| 4 | 47751663  | 47752029  | 367 | 47751736  | 5  | 3.58241 |
| 4 | 49962963  | 49963328  | 366 | 49963264  | 6  | 3.79171 |
| 4 | 50673134  | 50673474  | 341 | 50673281  | 7  | 5.47978 |
| 4 | 50977994  | 50978321  | 328 | 50978117  | 7  | 5.0835  |



|   |           |           |     |           |   |         |
|---|-----------|-----------|-----|-----------|---|---------|
| 4 | 59941879  | 59942199  | 321 | 59942187  | 6 | 4.50291 |
| 4 | 60295484  | 60295819  | 336 | 60295691  | 6 | 3.66421 |
| 4 | 61273647  | 61274020  | 374 | 61273670  | 5 | 3.58241 |
| 4 | 64521254  | 64521711  | 458 | 64521591  | 6 | 3.3206  |
| 4 | 66079399  | 66079700  | 302 | 66079527  | 7 | 5.47978 |
| 4 | 66191313  | 66191761  | 449 | 66191606  | 7 | 5.47978 |
| 4 | 66766559  | 66766884  | 326 | 66766734  | 5 | 3.41441 |
| 4 | 67377030  | 67377398  | 369 | 67377173  | 8 | 6.50668 |
| 4 | 69029109  | 69029460  | 352 | 69029253  | 6 | 4.35303 |
| 4 | 69568418  | 69568746  | 329 | 69568578  | 8 | 6.50668 |
| 4 | 70946786  | 70947192  | 407 | 70947124  | 8 | 6.50668 |
| 4 | 71023175  | 71023474  | 300 | 71023309  | 6 | 4.50291 |
| 4 | 71297080  | 71297445  | 366 | 71297250  | 8 | 6.11749 |
| 4 | 72845833  | 72846315  | 483 | 72846126  | 7 | 4.97847 |
| 4 | 75095840  | 75096152  | 313 | 75096018  | 6 | 4.50291 |
| 4 | 77017571  | 77017928  | 358 | 77017717  | 9 | 7.57852 |
| 4 | 77197772  | 77198073  | 302 | 77197858  | 8 | 6.24414 |
| 4 | 79384847  | 79385156  | 310 | 79384953  | 6 | 4.50291 |
| 4 | 79902162  | 79902537  | 376 | 79902320  | 8 | 6.50668 |
| 4 | 81145298  | 81145613  | 316 | 81145346  | 6 | 4.50291 |
| 4 | 81605185  | 81605550  | 366 | 81605203  | 8 | 5.56774 |
| 4 | 85052726  | 85053052  | 327 | 85052841  | 7 | 3.45771 |
| 4 | 85081215  | 85081531  | 317 | 85081384  | 7 | 3.45771 |
| 4 | 85689910  | 85690221  | 312 | 85690053  | 6 | 4.45522 |
| 4 | 85962657  | 85962999  | 343 | 85962772  | 7 | 4.97847 |
| 4 | 89736980  | 89737316  | 337 | 89737036  | 6 | 3.59105 |
| 4 | 90199377  | 90199694  | 318 | 90199573  | 6 | 4.07032 |
| 4 | 90563778  | 90564139  | 362 | 90563849  | 5 | 3.58241 |
| 4 | 91879389  | 91879729  | 341 | 91879556  | 8 | 5.56774 |
| 4 | 93777083  | 93777415  | 333 | 93777330  | 6 | 4.11516 |
| 4 | 96284862  | 96285189  | 328 | 96285136  | 5 | 3.29435 |
| 4 | 96352134  | 96352526  | 393 | 96352206  | 6 | 4.50291 |
| 4 | 98822432  | 98822736  | 305 | 98822566  | 7 | 5.47978 |
| 4 | 99594620  | 99594969  | 350 | 99594733  | 7 | 4.65491 |
| 4 | 103042911 | 103043501 | 591 | 103043473 | 6 | 3.89915 |
| 4 | 103325702 | 103326014 | 313 | 103325856 | 7 | 5.47978 |
| 4 | 103817812 | 103818140 | 329 | 103817972 | 7 | 5.47978 |
| 4 | 104534856 | 104535274 | 419 | 104534987 | 7 | 5.47978 |
| 4 | 110613735 | 110614122 | 388 | 110613951 | 8 | 6.50668 |
| 4 | 111911948 | 111912296 | 349 | 111912106 | 5 | 3.58241 |
| 4 | 115026216 | 115026590 | 375 | 115026278 | 5 | 3.58241 |
| 4 | 115573527 | 115573829 | 303 | 115573702 | 6 | 4.50291 |
| 4 | 126377306 | 126377618 | 313 | 126377317 | 7 | 4.339   |
| 4 | 127109560 | 127109992 | 433 | 127109571 | 5 | 3.58241 |
| 4 | 127564094 | 127564456 | 363 | 127564131 | 5 | 3.58241 |
| 4 | 136574947 | 136575322 | 376 | 136574980 | 7 | 4.10626 |
| 4 | 145493345 | 145493897 | 553 | 145493833 | 7 | 4.65491 |
| 4 | 145631337 | 145631668 | 332 | 145631627 | 6 | 4.35303 |

|   |           |           |     |           |    |         |
|---|-----------|-----------|-----|-----------|----|---------|
| 4 | 145876061 | 145876408 | 348 | 145876257 | 6  | 4.20747 |
| 4 | 146088464 | 146088792 | 329 | 146088682 | 7  | 3.79296 |
| 4 | 146165662 | 146166069 | 408 | 146165927 | 12 | 5.60636 |
| 4 | 146192831 | 146193192 | 362 | 146192977 | 11 | 6.62187 |
| 4 | 146443715 | 146444183 | 469 | 146443933 | 9  | 4.32007 |
| 4 | 146447278 | 146447745 | 468 | 146447511 | 9  | 3.94891 |
| 4 | 146476489 | 146476840 | 352 | 146476657 | 12 | 6.06634 |
| 4 | 146599027 | 146599909 | 883 | 146599044 | 9  | 3.19498 |
| 4 | 146716757 | 146717077 | 321 | 146716946 | 15 | 6.28915 |
| 4 | 147018099 | 147018417 | 319 | 147018307 | 10 | 5.80609 |
| 4 | 147158973 | 147159311 | 339 | 147159136 | 6  | 3.98315 |
| 4 | 147190612 | 147191397 | 786 | 147191315 | 11 | 6.446   |
| 4 | 147273376 | 147273682 | 307 | 147273563 | 7  | 3.72842 |
| 4 | 147379377 | 147379857 | 481 | 147379736 | 10 | 3.14799 |
| 4 | 147380949 | 147381372 | 424 | 147380990 | 11 | 3.71443 |
| 4 | 147478783 | 147479116 | 334 | 147478829 | 7  | 3.45771 |
| 4 | 147497751 | 147498298 | 548 | 147498027 | 10 | 6.19739 |
| 4 | 147672688 | 147673081 | 394 | 147673067 | 7  | 4.5946  |
| 5 | 5244159   | 5244466   | 308 | 5244302   | 6  | 3.66421 |
| 5 | 5453839   | 5454279   | 441 | 5453979   | 8  | 4.00857 |
| 5 | 6187520   | 6187909   | 390 | 6187560   | 7  | 3.45771 |
| 5 | 6525147   | 6525889   | 743 | 6525156   | 8  | 3.88945 |
| 5 | 6738934   | 6739272   | 339 | 6739073   | 10 | 5.80609 |
| 5 | 6886751   | 6887130   | 380 | 6886809   | 10 | 5.80609 |
| 5 | 7050830   | 7051139   | 310 | 7051052   | 7  | 4.42147 |
| 5 | 7173416   | 7173814   | 399 | 7173802   | 6  | 3.77863 |
| 5 | 7297917   | 7298239   | 323 | 7298078   | 7  | 5.47978 |
| 5 | 7519698   | 7520121   | 424 | 7519761   | 8  | 4.94122 |
| 5 | 7619775   | 7620099   | 325 | 7619791   | 6  | 3.79171 |
| 5 | 7678257   | 7678652   | 396 | 7678545   | 6  | 3.79171 |
| 5 | 7699705   | 7700080   | 376 | 7699856   | 8  | 6.05599 |
| 5 | 8876928   | 8877278   | 351 | 8877187   | 9  | 5.37431 |
| 5 | 9225340   | 9225718   | 379 | 9225697   | 7  | 4.06945 |
| 5 | 9484327   | 9484631   | 305 | 9484598   | 7  | 3.45771 |
| 5 | 9527839   | 9528247   | 409 | 9528128   | 5  | 3.58241 |
| 5 | 9738317   | 9738752   | 436 | 9738426   | 6  | 3.94077 |
| 5 | 9757621   | 9757950   | 330 | 9757657   | 9  | 4.98189 |
| 5 | 9767908   | 9768253   | 346 | 9768020   | 9  | 5.7264  |
| 5 | 9911583   | 9911941   | 359 | 9911865   | 7  | 4.10627 |
| 5 | 10323692  | 10324220  | 529 | 10323850  | 10 | 5.80609 |
| 5 | 10427595  | 10428157  | 563 | 10427705  | 6  | 3.3206  |
| 5 | 10673584  | 10673970  | 387 | 10673648  | 7  | 4.03317 |
| 5 | 11304202  | 11304511  | 310 | 11304214  | 6  | 3.48566 |
| 5 | 11368338  | 11368719  | 382 | 11368600  | 7  | 3.76048 |
| 5 | 11423280  | 11423625  | 346 | 11423497  | 7  | 4.97847 |
| 5 | 11454647  | 11455025  | 379 | 11454929  | 7  | 4.97847 |
| 5 | 11476769  | 11477142  | 374 | 11476800  | 7  | 5.47978 |
| 5 | 11498583  | 11498916  | 334 | 11498766  | 8  | 5.56774 |

|   |          |          |     |          |    |          |
|---|----------|----------|-----|----------|----|----------|
| 5 | 11720566 | 11721181 | 616 | 11721086 | 8  | 3.28682  |
| 5 | 11816946 | 11817259 | 314 | 11817152 | 8  | 4.89911  |
| 5 | 12217279 | 12217586 | 308 | 12217481 | 8  | 3.28682  |
| 5 | 12254602 | 12255260 | 659 | 12255090 | 7  | 4.06945  |
| 5 | 14217219 | 14217543 | 325 | 14217404 | 8  | 3.51085  |
| 5 | 14297841 | 14298222 | 382 | 14298139 | 7  | 3.45771  |
| 5 | 14311215 | 14311744 | 530 | 14311615 | 7  | 3.1897   |
| 5 | 14500564 | 14500880 | 317 | 14500718 | 8  | 4.58252  |
| 5 | 14914647 | 14914991 | 345 | 14914941 | 12 | 3.12881  |
| 5 | 14933403 | 14934007 | 605 | 14933701 | 36 | 6.26395  |
| 5 | 14948754 | 14949174 | 421 | 14948813 | 27 | 4.7971   |
| 5 | 14959310 | 14959746 | 437 | 14959428 | 41 | 4.36845  |
| 5 | 14990918 | 14991242 | 325 | 14991009 | 22 | 4.87838  |
| 5 | 15006501 | 15006895 | 395 | 15006724 | 40 | 6.06244  |
| 5 | 15026089 | 15026481 | 393 | 15026229 | 37 | 5.93086  |
| 5 | 15042535 | 15042938 | 404 | 15042640 | 55 | 15.99195 |
| 5 | 15051677 | 15052029 | 353 | 15051732 | 39 | 5.68027  |
| 5 | 15539791 | 15540288 | 498 | 15539933 | 15 | 3.98281  |
| 5 | 15598699 | 15599065 | 367 | 15598762 | 20 | 5.12562  |
| 5 | 15651202 | 15651557 | 356 | 15651443 | 25 | 3.37308  |
| 5 | 15655143 | 15655452 | 310 | 15655306 | 20 | 4.17295  |
| 5 | 15663220 | 15663856 | 637 | 15663329 | 20 | 6.33344  |
| 5 | 15677908 | 15678562 | 655 | 15678461 | 28 | 3.04249  |
| 5 | 15689530 | 15690015 | 486 | 15689777 | 46 | 6.67817  |
| 5 | 15703313 | 15703634 | 322 | 15703461 | 32 | 5.36398  |
| 5 | 17779138 | 17779479 | 342 | 17779298 | 8  | 4.94122  |
| 5 | 18010354 | 18010654 | 301 | 18010371 | 9  | 3.78016  |
| 5 | 18226062 | 18226410 | 349 | 18226273 | 10 | 5.27216  |
| 5 | 18412924 | 18413234 | 311 | 18413221 | 7  | 3.57424  |
| 5 | 18490447 | 18491124 | 678 | 18490941 | 7  | 4.77975  |
| 5 | 18850295 | 18850617 | 323 | 18850579 | 7  | 3.45771  |
| 5 | 19048656 | 19049044 | 389 | 19049003 | 7  | 4.65491  |
| 5 | 19841611 | 19842166 | 556 | 19842112 | 7  | 5.30623  |
| 5 | 20356001 | 20356319 | 319 | 20356013 | 10 | 4.65057  |
| 5 | 20403701 | 20404057 | 357 | 20403863 | 7  | 5.47978  |
| 5 | 20460788 | 20461529 | 742 | 20460978 | 9  | 6.87393  |
| 5 | 20701531 | 20701864 | 334 | 20701842 | 7  | 3.45771  |
| 5 | 20735369 | 20735690 | 322 | 20735589 | 6  | 3.8181   |
| 5 | 21801708 | 21802055 | 348 | 21801967 | 7  | 5.47978  |
| 5 | 22343057 | 22343426 | 370 | 22343066 | 6  | 3.79171  |
| 5 | 23559827 | 23560160 | 334 | 23559855 | 7  | 3.82588  |
| 5 | 26029310 | 26029679 | 370 | 26029501 | 13 | 5.45117  |
| 5 | 26041652 | 26042005 | 354 | 26041763 | 8  | 5.56774  |
| 5 | 26502047 | 26502354 | 308 | 26502178 | 6  | 4.50291  |
| 5 | 27380968 | 27381339 | 372 | 27381257 | 5  | 3.49869  |
| 5 | 27438254 | 27438871 | 618 | 27438370 | 5  | 3.5422   |
| 5 | 27495555 | 27495887 | 333 | 27495808 | 5  | 3.58241  |
| 5 | 28633621 | 28633940 | 320 | 28633788 | 7  | 4.50662  |

|   |          |          |     |          |    |         |
|---|----------|----------|-----|----------|----|---------|
| 5 | 28777291 | 28777967 | 677 | 28777863 | 6  | 3.79171 |
| 5 | 29448417 | 29448757 | 341 | 29448552 | 6  | 4.30352 |
| 5 | 35115519 | 35115825 | 307 | 35115538 | 5  | 3.29435 |
| 5 | 35542348 | 35542695 | 348 | 35542465 | 6  | 3.89915 |
| 5 | 37038435 | 37038739 | 305 | 37038659 | 7  | 5.47978 |
| 5 | 37147279 | 37147581 | 303 | 37147465 | 5  | 3.58241 |
| 5 | 37869739 | 37870041 | 303 | 37869810 | 6  | 3.77863 |
| 5 | 38430447 | 38430809 | 363 | 38430650 | 8  | 4.94122 |
| 5 | 38471842 | 38472152 | 311 | 38472060 | 7  | 4.65491 |
| 5 | 39227524 | 39227890 | 367 | 39227768 | 7  | 5.47978 |
| 5 | 39389560 | 39389888 | 329 | 39389705 | 7  | 5.03049 |
| 5 | 39981598 | 39981984 | 387 | 39981689 | 8  | 5.71006 |
| 5 | 40101831 | 40102147 | 317 | 40101863 | 7  | 5.36479 |
| 5 | 40361914 | 40362228 | 315 | 40362166 | 6  | 4.45522 |
| 5 | 40388733 | 40389147 | 415 | 40388979 | 7  | 5.0835  |
| 5 | 40419540 | 40419920 | 381 | 40419617 | 6  | 4.45522 |
| 5 | 40428100 | 40428412 | 313 | 40428216 | 8  | 4.8576  |
| 5 | 40511945 | 40512313 | 369 | 40512104 | 7  | 5.42458 |
| 5 | 40642801 | 40643476 | 676 | 40643287 | 8  | 5.60272 |
| 5 | 40856652 | 40857003 | 352 | 40856930 | 8  | 6.44394 |
| 5 | 40919702 | 40920075 | 374 | 40919983 | 6  | 3.19716 |
| 5 | 41083741 | 41084046 | 306 | 41083762 | 6  | 3.89915 |
| 5 | 41410212 | 41410546 | 335 | 41410426 | 7  | 4.5946  |
| 5 | 41554343 | 41554746 | 404 | 41554671 | 6  | 3.66421 |
| 5 | 41602029 | 41602496 | 468 | 41602215 | 8  | 6.50668 |
| 5 | 42263741 | 42264189 | 449 | 42264080 | 6  | 4.02633 |
| 5 | 43610530 | 43610917 | 388 | 43610590 | 5  | 3.25592 |
| 5 | 44089432 | 44089943 | 512 | 44089766 | 6  | 4.16086 |
| 5 | 44158731 | 44159063 | 333 | 44158881 | 7  | 4.22    |
| 5 | 44426114 | 44426418 | 305 | 44426131 | 6  | 3.79171 |
| 5 | 44879912 | 44880235 | 324 | 44880105 | 6  | 4.50291 |
| 5 | 45153087 | 45153647 | 561 | 45153155 | 6  | 3.89915 |
| 5 | 45336031 | 45336517 | 487 | 45336368 | 5  | 3.1094  |
| 5 | 46372753 | 46373057 | 305 | 46372802 | 6  | 4.45522 |
| 5 | 46550097 | 46550711 | 615 | 46550183 | 6  | 3.94077 |
| 5 | 46643334 | 46643682 | 349 | 46643492 | 10 | 6.58426 |
| 5 | 46659286 | 46659585 | 300 | 46659358 | 5  | 3.29435 |
| 5 | 47968911 | 47969215 | 305 | 47969037 | 7  | 5.24887 |
| 5 | 49058656 | 49059020 | 365 | 49058958 | 9  | 6.93917 |
| 5 | 49308713 | 49309130 | 418 | 49308895 | 8  | 4.94122 |
| 5 | 49574576 | 49574898 | 323 | 49574598 | 7  | 4.10626 |
| 5 | 50321293 | 50321724 | 432 | 50321425 | 8  | 3.28682 |
| 5 | 50354556 | 50354878 | 323 | 50354633 | 8  | 5.44836 |
| 5 | 50468217 | 50468542 | 326 | 50468331 | 7  | 5.13754 |
| 5 | 50805549 | 50806110 | 562 | 50805967 | 7  | 3.89308 |
| 5 | 52029477 | 52029816 | 340 | 52029499 | 6  | 4.07032 |
| 5 | 53153070 | 53153422 | 353 | 53153168 | 7  | 4.82809 |
| 5 | 53871334 | 53871640 | 307 | 53871342 | 6  | 3.02469 |

|   |          |          |     |          |    |         |
|---|----------|----------|-----|----------|----|---------|
| 5 | 54362236 | 54362625 | 390 | 54362428 | 7  | 4.50662 |
| 5 | 54430939 | 54431263 | 325 | 54430942 | 5  | 3.4561  |
| 5 | 54506977 | 54507289 | 313 | 54506999 | 8  | 4.19779 |
| 5 | 54558606 | 54559097 | 492 | 54558798 | 6  | 3.79171 |
| 5 | 54582729 | 54583056 | 328 | 54582863 | 8  | 5.3014  |
| 5 | 54686175 | 54686989 | 815 | 54686295 | 10 | 5.80609 |
| 5 | 55014250 | 55014560 | 311 | 55014361 | 6  | 4.50291 |
| 5 | 55053510 | 55053834 | 325 | 55053677 | 8  | 4.19779 |
| 5 | 55356887 | 55357221 | 335 | 55357160 | 9  | 6.11997 |
| 5 | 56078126 | 56078473 | 348 | 56078197 | 7  | 4.29872 |
| 5 | 56114470 | 56114792 | 323 | 56114637 | 8  | 4.98393 |
| 5 | 56163527 | 56164018 | 492 | 56163818 | 9  | 3.94891 |
| 5 | 56178690 | 56179132 | 443 | 56178928 | 10 | 6.33777 |
| 5 | 56600282 | 56600607 | 326 | 56600523 | 7  | 4.77975 |
| 5 | 56713696 | 56714673 | 978 | 56714086 | 9  | 4.98189 |
| 5 | 56844263 | 56844599 | 337 | 56844292 | 7  | 5.47978 |
| 5 | 57317092 | 57317408 | 317 | 57317256 | 9  | 5.37431 |
| 5 | 57451890 | 57452255 | 366 | 57452106 | 9  | 6.33515 |
| 5 | 57572647 | 57573078 | 432 | 57572797 | 9  | 5.54566 |
| 5 | 58722250 | 58722586 | 337 | 58722291 | 7  | 3.76048 |
| 5 | 58753598 | 58753920 | 323 | 58753850 | 9  | 4.03728 |
| 5 | 58932198 | 58932621 | 424 | 58932220 | 6  | 3.77863 |
| 5 | 59010534 | 59010930 | 397 | 59010646 | 7  | 3.45771 |
| 5 | 59012825 | 59013189 | 365 | 59012945 | 7  | 4.29872 |
| 5 | 59197325 | 59197683 | 359 | 59197634 | 6  | 3.89915 |
| 5 | 59210436 | 59210737 | 302 | 59210668 | 7  | 3.1897  |
| 5 | 59446803 | 59447144 | 342 | 59446976 | 9  | 6.33515 |
| 5 | 59600290 | 59600797 | 508 | 59600483 | 9  | 3.94891 |
| 5 | 59686522 | 59686837 | 316 | 59686785 | 5  | 3.4561  |
| 5 | 59825205 | 59825526 | 322 | 59825388 | 9  | 6.33515 |
| 5 | 59896927 | 59897506 | 580 | 59897354 | 9  | 6.11997 |
| 5 | 59962330 | 59962784 | 455 | 59962478 | 7  | 5.47978 |
| 5 | 60518470 | 60518837 | 368 | 60518553 | 7  | 4.82809 |
| 5 | 61310710 | 61311019 | 310 | 61310833 | 7  | 3.45771 |
| 5 | 61564475 | 61564926 | 452 | 61564800 | 6  | 3.35262 |
| 5 | 61911422 | 61911739 | 318 | 61911452 | 5  | 3.21823 |
| 5 | 62038753 | 62039073 | 321 | 62038869 | 6  | 4.50291 |
| 5 | 62039673 | 62040036 | 364 | 62039806 | 6  | 3.79171 |
| 5 | 63182307 | 63182694 | 388 | 63182620 | 8  | 4.58252 |
| 5 | 64012592 | 64012892 | 301 | 64012629 | 5  | 3.58241 |
| 5 | 65124632 | 65125004 | 373 | 65124688 | 6  | 3.66421 |
| 5 | 71225214 | 71225534 | 321 | 71225378 | 6  | 3.89915 |
| 5 | 71231785 | 71232103 | 319 | 71231824 | 6  | 4.50291 |
| 5 | 71710489 | 71710831 | 343 | 71710685 | 7  | 4.87731 |
| 5 | 72237600 | 72237946 | 347 | 72237920 | 6  | 4.25501 |
| 5 | 73588185 | 73588875 | 691 | 73588694 | 6  | 4.50291 |
| 5 | 73918337 | 73918676 | 340 | 73918427 | 6  | 3.77863 |
| 5 | 75004966 | 75005286 | 321 | 75005099 | 8  | 6.44394 |

|   |           |           |     |           |    |         |
|---|-----------|-----------|-----|-----------|----|---------|
| 5 | 76239123  | 76239422  | 300 | 76239276  | 6  | 4.25501 |
| 5 | 78123186  | 78123572  | 387 | 78123316  | 10 | 5.80609 |
| 5 | 78321144  | 78321445  | 302 | 78321323  | 5  | 3.58241 |
| 5 | 79758302  | 79758720  | 419 | 79758709  | 6  | 4.50291 |
| 5 | 80895507  | 80895855  | 349 | 80895586  | 6  | 3.79171 |
| 5 | 84894255  | 84894614  | 360 | 84894574  | 6  | 3.79171 |
| 5 | 86374987  | 86375302  | 316 | 86375152  | 5  | 3.58241 |
| 5 | 88319962  | 88320491  | 530 | 88319992  | 5  | 3.29435 |
| 5 | 88584960  | 88585365  | 406 | 88585165  | 9  | 6.93917 |
| 5 | 89208034  | 89208379  | 346 | 89208192  | 7  | 3.45771 |
| 5 | 89398628  | 89398928  | 301 | 89398897  | 5  | 3.37357 |
| 5 | 89678082  | 89678424  | 343 | 89678209  | 7  | 5.47978 |
| 5 | 90475515  | 90475934  | 420 | 90475786  | 7  | 3.45771 |
| 5 | 94663595  | 94663895  | 301 | 94663707  | 7  | 5.47978 |
| 5 | 96057367  | 96057689  | 323 | 96057602  | 6  | 4.20747 |
| 5 | 100291828 | 100292155 | 328 | 100291979 | 7  | 5.47978 |
| 5 | 102524376 | 102524724 | 349 | 102524440 | 7  | 5.47978 |
| 5 | 107326888 | 107327194 | 307 | 107326982 | 6  | 4.50291 |
| 5 | 120673442 | 120673745 | 304 | 120673732 | 7  | 4.97847 |
| 5 | 125701809 | 125702124 | 316 | 125701851 | 5  | 3.58241 |
| 5 | 127727122 | 127727658 | 537 | 127727634 | 6  | 4.50291 |
| 5 | 136035291 | 136035611 | 321 | 136035493 | 7  | 5.47978 |
| 5 | 140362848 | 140363177 | 330 | 140363005 | 6  | 4.50291 |
| 5 | 145452847 | 145453217 | 371 | 145452933 | 7  | 5.47978 |
| 5 | 145480059 | 145480419 | 361 | 145480248 | 6  | 4.07032 |
| 5 | 146038952 | 146039274 | 323 | 146039084 | 8  | 5.93643 |
| 5 | 147670778 | 147671175 | 398 | 147671162 | 6  | 4.20747 |
| 5 | 149255149 | 149255487 | 339 | 149255240 | 5  | 3.58241 |
| 5 | 150791068 | 150791641 | 574 | 150791484 | 8  | 5.82121 |
| 6 | 3123651   | 3124111   | 461 | 3123761   | 5  | 3.1094  |
| 6 | 3980219   | 3980640   | 422 | 3980259   | 7  | 4.10626 |
| 6 | 6792283   | 6792737   | 455 | 6792450   | 7  | 4.82809 |
| 6 | 7383100   | 7383497   | 398 | 7383351   | 6  | 4.50291 |
| 6 | 7921933   | 7922254   | 322 | 7922109   | 7  | 4.10626 |
| 6 | 8315927   | 8316248   | 322 | 8316150   | 7  | 5.36479 |
| 6 | 9573841   | 9574148   | 308 | 9574023   | 7  | 4.65491 |
| 6 | 9650241   | 9650606   | 366 | 9650508   | 5  | 3.5422  |
| 6 | 9706425   | 9706741   | 317 | 9706617   | 6  | 4.50291 |
| 6 | 9777237   | 9777544   | 308 | 9777424   | 6  | 4.50291 |
| 6 | 10721995  | 10722324  | 330 | 10722238  | 6  | 4.50291 |
| 6 | 12240555  | 12240871  | 317 | 12240646  | 5  | 3.58241 |
| 6 | 13234825  | 13235131  | 307 | 13234958  | 6  | 3.70171 |
| 6 | 13453641  | 13453965  | 325 | 13453854  | 6  | 4.50291 |
| 6 | 13530478  | 13530798  | 321 | 13530752  | 6  | 4.07032 |
| 6 | 14990896  | 14991239  | 344 | 14991029  | 6  | 4.25501 |
| 6 | 15001614  | 15002100  | 487 | 15001841  | 7  | 5.47978 |
| 6 | 15578947  | 15579248  | 302 | 15579234  | 6  | 4.50291 |
| 6 | 16810526  | 16810886  | 361 | 16810692  | 6  | 3.98315 |

|   |          |          |     |          |   |         |
|---|----------|----------|-----|----------|---|---------|
| 6 | 16814427 | 16814739 | 313 | 16814471 | 6 | 3.73984 |
| 6 | 17537786 | 17538226 | 441 | 17537928 | 5 | 3.33356 |
| 6 | 17708995 | 17709331 | 337 | 17709130 | 6 | 3.79171 |
| 6 | 18583410 | 18583840 | 431 | 18583728 | 6 | 3.79171 |
| 6 | 20855438 | 20855757 | 320 | 20855494 | 6 | 4.30352 |
| 6 | 22050636 | 22050942 | 307 | 22050726 | 7 | 4.65491 |
| 6 | 23366892 | 23367205 | 314 | 23367055 | 8 | 6.50668 |
| 6 | 23368921 | 23369267 | 347 | 23368930 | 7 | 5.47978 |
| 6 | 23585519 | 23585879 | 361 | 23585651 | 5 | 3.58241 |
| 6 | 26119834 | 26120156 | 323 | 26120040 | 7 | 5.47978 |
| 6 | 26204499 | 26204866 | 368 | 26204586 | 7 | 5.47978 |
| 6 | 27368071 | 27368381 | 311 | 27368352 | 8 | 3.88945 |
| 6 | 33331489 | 33331809 | 321 | 33331762 | 6 | 3.85827 |
| 6 | 34338855 | 34339468 | 614 | 34339120 | 7 | 5.13754 |
| 6 | 34544038 | 34544341 | 304 | 34544213 | 6 | 3.79171 |
| 6 | 35929634 | 35929994 | 361 | 35929770 | 8 | 6.30939 |
| 6 | 36329883 | 36330690 | 808 | 36330625 | 8 | 6.50668 |
| 6 | 37725654 | 37726178 | 525 | 37725885 | 5 | 3.29435 |
| 6 | 40104690 | 40105015 | 326 | 40104750 | 7 | 5.42458 |
| 6 | 43170580 | 43170979 | 400 | 43170700 | 7 | 5.36479 |
| 6 | 43228763 | 43229133 | 371 | 43228902 | 8 | 6.24414 |
| 6 | 45473691 | 45474184 | 494 | 45473826 | 6 | 4.50291 |
| 6 | 45900082 | 45900524 | 443 | 45900165 | 7 | 5.47978 |
| 6 | 48882498 | 48882862 | 365 | 48882516 | 6 | 3.79171 |
| 6 | 50811217 | 50811529 | 313 | 50811403 | 6 | 4.50291 |
| 6 | 55698035 | 55698366 | 332 | 55698182 | 6 | 4.50291 |
| 6 | 56631549 | 56631902 | 354 | 56631620 | 6 | 3.3206  |
| 6 | 59439461 | 59439778 | 318 | 59439592 | 6 | 4.50291 |
| 6 | 60824147 | 60824447 | 301 | 60824295 | 7 | 4.65491 |
| 6 | 61027490 | 61027829 | 340 | 61027681 | 7 | 5.36479 |
| 6 | 62133488 | 62133829 | 342 | 62133499 | 5 | 3.04015 |
| 6 | 62264865 | 62265225 | 361 | 62264976 | 8 | 4.94122 |
| 6 | 62317263 | 62317708 | 446 | 62317650 | 7 | 4.6397  |
| 6 | 62348751 | 62349691 | 941 | 62348861 | 8 | 5.49896 |
| 6 | 62672381 | 62672786 | 406 | 62672674 | 7 | 5.47978 |
| 6 | 63036551 | 63036866 | 316 | 63036818 | 9 | 5.37431 |
| 6 | 63417636 | 63417944 | 309 | 63417844 | 8 | 4.19779 |
| 6 | 63599941 | 63600264 | 324 | 63600146 | 6 | 3.77863 |
| 6 | 63784551 | 63784894 | 344 | 63784695 | 9 | 6.33515 |
| 6 | 63892689 | 63893014 | 326 | 63892901 | 6 | 4.50291 |
| 6 | 64130392 | 64131014 | 623 | 64130884 | 5 | 3.18126 |
| 6 | 64453954 | 64454370 | 417 | 64454260 | 7 | 5.30623 |
| 6 | 65032552 | 65033052 | 501 | 65032691 | 5 | 3.5422  |
| 6 | 65250718 | 65251134 | 417 | 65250983 | 7 | 4.97847 |
| 6 | 65303006 | 65303513 | 508 | 65303369 | 5 | 3.4561  |
| 6 | 66199206 | 66199561 | 356 | 66199465 | 7 | 5.47978 |
| 6 | 66564838 | 66565220 | 383 | 66565019 | 5 | 3.21823 |
| 6 | 67461285 | 67461620 | 336 | 67461499 | 7 | 4.18152 |

|   |           |           |     |           |    |         |
|---|-----------|-----------|-----|-----------|----|---------|
| 6 | 67654172  | 67654489  | 318 | 67654173  | 7  | 3.45771 |
| 6 | 68291411  | 68291729  | 319 | 68291627  | 6  | 4.50291 |
| 6 | 69518578  | 69518895  | 318 | 69518699  | 8  | 6.50668 |
| 6 | 70002500  | 70002866  | 367 | 70002810  | 5  | 3.58241 |
| 6 | 70949175  | 70949501  | 327 | 70949196  | 6  | 4.50291 |
| 6 | 70995871  | 70996210  | 340 | 70996023  | 7  | 5.47978 |
| 6 | 71617808  | 71618124  | 317 | 71617945  | 7  | 5.03049 |
| 6 | 71944653  | 71945225  | 573 | 71944863  | 5  | 3.58241 |
| 6 | 75943412  | 75943814  | 403 | 75943548  | 8  | 6.50668 |
| 6 | 76364610  | 76364932  | 323 | 76364710  | 7  | 4.97847 |
| 6 | 78844877  | 78845233  | 357 | 78844917  | 5  | 3.58241 |
| 6 | 79280160  | 79280534  | 375 | 79280210  | 8  | 6.50668 |
| 6 | 80932210  | 80932513  | 304 | 80932332  | 8  | 6.50668 |
| 6 | 81052006  | 81052437  | 432 | 81052025  | 6  | 3.79171 |
| 6 | 92424725  | 92425034  | 310 | 92424966  | 9  | 3.94891 |
| 6 | 92600955  | 92601344  | 390 | 92601040  | 6  | 3.79171 |
| 6 | 93426424  | 93426802  | 379 | 93426530  | 7  | 4.65491 |
| 6 | 93468677  | 93469019  | 343 | 93468707  | 5  | 3.58241 |
| 6 | 94824537  | 94824881  | 345 | 94824670  | 8  | 6.50668 |
| 6 | 96073840  | 96074184  | 345 | 96074117  | 6  | 4.50291 |
| 6 | 97721104  | 97721435  | 332 | 97721317  | 6  | 4.45522 |
| 6 | 103761400 | 103761708 | 309 | 103761409 | 5  | 3.5422  |
| 6 | 103909128 | 103909477 | 350 | 103909314 | 6  | 4.50291 |
| 6 | 104812523 | 104812890 | 368 | 104812533 | 6  | 3.79171 |
| 6 | 105668034 | 105668346 | 313 | 105668241 | 6  | 4.50291 |
| 6 | 109437516 | 109437837 | 322 | 109437787 | 6  | 3.79171 |
| 6 | 109763982 | 109764302 | 321 | 109764045 | 6  | 4.50291 |
| 6 | 111162432 | 111162736 | 305 | 111162437 | 5  | 3.58241 |
| 6 | 114184144 | 114184497 | 354 | 114184438 | 6  | 4.50291 |
| 6 | 116819443 | 116819816 | 374 | 116819574 | 6  | 4.50291 |
| 6 | 122100680 | 122101204 | 525 | 122100745 | 6  | 4.50291 |
| 6 | 122195214 | 122195680 | 467 | 122195396 | 6  | 4.50291 |
| 6 | 123184414 | 123184717 | 304 | 123184701 | 5  | 3.58241 |
| 6 | 123261639 | 123262003 | 365 | 123261688 | 6  | 3.79171 |
| 6 | 128185343 | 128185653 | 311 | 128185462 | 8  | 6.50668 |
| 6 | 128682700 | 128683081 | 382 | 128682927 | 7  | 5.24887 |
| 6 | 130034498 | 130034797 | 300 | 130034609 | 5  | 3.29435 |
| 6 | 130101019 | 130101332 | 314 | 130101270 | 6  | 4.50291 |
| 6 | 131544696 | 131545001 | 306 | 131544795 | 6  | 4.50291 |
| 6 | 132337411 | 132337725 | 315 | 132337414 | 7  | 3.45771 |
| 6 | 132839519 | 132840090 | 572 | 132839725 | 10 | 8.69114 |
| 6 | 138940584 | 138940902 | 319 | 138940593 | 5  | 3.58241 |
| 6 | 138943586 | 138944006 | 421 | 138943755 | 8  | 6.50668 |
| 6 | 139846951 | 139847276 | 326 | 139847201 | 6  | 4.50291 |
| 6 | 140388531 | 140388848 | 318 | 140388587 | 6  | 4.50291 |
| 6 | 140866210 | 140866600 | 391 | 140866512 | 6  | 4.30352 |
| 6 | 141241848 | 141242258 | 411 | 141241955 | 7  | 5.47978 |
| 6 | 141444879 | 141445464 | 586 | 141444898 | 7  | 3.45771 |



|   |           |           |     |           |    |         |
|---|-----------|-----------|-----|-----------|----|---------|
| 6 | 144586892 | 144587282 | 391 | 144586910 | 6  | 3.79171 |
| 6 | 145580089 | 145580416 | 328 | 145580146 | 5  | 3.58241 |
| 6 | 146920957 | 146921320 | 364 | 146921015 | 7  | 5.30623 |
| 7 | 7682993   | 7683566   | 574 | 7683547   | 6  | 3.3206  |
| 7 | 11372588  | 11372894  | 307 | 11372704  | 7  | 5.47978 |
| 7 | 12010482  | 12010790  | 309 | 12010587  | 12 | 4.31384 |
| 7 | 15297424  | 15297751  | 328 | 15297511  | 5  | 3.58241 |
| 7 | 15447727  | 15448026  | 300 | 15447882  | 6  | 4.30352 |
| 7 | 15463632  | 15464036  | 405 | 15463808  | 8  | 6.50668 |
| 7 | 15990297  | 15990774  | 478 | 15990596  | 6  | 4.50291 |
| 7 | 18488404  | 18488734  | 331 | 18488581  | 10 | 6.74034 |
| 7 | 20813879  | 20814184  | 306 | 20814097  | 5  | 3.58241 |
| 7 | 22214937  | 22215261  | 325 | 22215119  | 6  | 3.79171 |
| 7 | 22759468  | 22759956  | 489 | 22759711  | 7  | 5.47978 |
| 7 | 31470155  | 31470496  | 342 | 31470171  | 5  | 3.58241 |
| 7 | 31889722  | 31890076  | 355 | 31889880  | 5  | 3.58241 |
| 7 | 38184417  | 38184783  | 367 | 38184587  | 12 | 5.60636 |
| 7 | 41964394  | 41964721  | 328 | 41964532  | 5  | 3.58241 |
| 7 | 43158918  | 43159372  | 455 | 43159089  | 6  | 4.50291 |
| 7 | 43389236  | 43389575  | 340 | 43389547  | 6  | 4.50291 |
| 7 | 47619100  | 47619454  | 355 | 47619130  | 5  | 3.58241 |
| 7 | 48201880  | 48202215  | 336 | 48202005  | 5  | 3.58241 |
| 7 | 51355076  | 51355391  | 316 | 51355217  | 6  | 4.50291 |
| 7 | 55225985  | 55226297  | 313 | 55226202  | 7  | 3.45771 |
| 7 | 56581053  | 56581378  | 326 | 56581061  | 7  | 4.65491 |
| 7 | 59318346  | 59318707  | 362 | 59318578  | 6  | 3.52023 |
| 7 | 59768280  | 59768629  | 350 | 59768561  | 16 | 4.12922 |
| 7 | 60226568  | 60226900  | 333 | 60226689  | 6  | 4.50291 |
| 7 | 61880389  | 61880774  | 386 | 61880460  | 5  | 3.58241 |
| 7 | 62535959  | 62536280  | 322 | 62535981  | 7  | 3.45771 |
| 7 | 62959639  | 62960051  | 413 | 62959937  | 5  | 3.58241 |
| 7 | 63552259  | 63552572  | 314 | 63552278  | 6  | 3.79171 |
| 7 | 64488673  | 64488987  | 315 | 64488896  | 9  | 4.98189 |
| 7 | 74838260  | 74838619  | 360 | 74838458  | 7  | 4.65491 |
| 7 | 75739357  | 75739682  | 326 | 75739524  | 6  | 4.50291 |
| 7 | 76358194  | 76358500  | 307 | 76358430  | 8  | 5.39858 |
| 7 | 79677265  | 79677657  | 393 | 79677515  | 5  | 3.29435 |
| 7 | 80604253  | 80604584  | 332 | 80604324  | 7  | 4.65491 |
| 7 | 84063770  | 84064097  | 328 | 84063934  | 6  | 4.50291 |
| 7 | 84783518  | 84783822  | 305 | 84783724  | 7  | 5.47978 |
| 7 | 85303835  | 85304161  | 327 | 85304109  | 6  | 4.50291 |
| 7 | 86061665  | 86062018  | 354 | 86061917  | 6  | 4.50291 |
| 7 | 86621999  | 86622355  | 357 | 86622155  | 6  | 4.50291 |
| 7 | 87219916  | 87220216  | 301 | 87220108  | 8  | 6.18019 |
| 7 | 87563118  | 87563423  | 306 | 87563233  | 5  | 3.21823 |
| 7 | 88509163  | 88509464  | 302 | 88509293  | 6  | 4.50291 |
| 7 | 89725605  | 89725918  | 314 | 89725730  | 5  | 3.5422  |
| 7 | 90165495  | 90165809  | 315 | 90165629  | 7  | 5.24887 |

|   |           |           |     |           |    |          |
|---|-----------|-----------|-----|-----------|----|----------|
| 7 | 91376525  | 91376849  | 325 | 91376714  | 8  | 5.49896  |
| 7 | 92729736  | 92730116  | 381 | 92729886  | 6  | 4.07032  |
| 7 | 93926763  | 93927125  | 363 | 93926769  | 6  | 3.79171  |
| 7 | 94046332  | 94046665  | 334 | 94046348  | 5  | 3.37357  |
| 7 | 94096162  | 94096767  | 606 | 94096670  | 9  | 4.32007  |
| 7 | 94847392  | 94847713  | 322 | 94847456  | 8  | 4.54529  |
| 7 | 95014405  | 95014746  | 342 | 95014562  | 6  | 4.07032  |
| 7 | 97221936  | 97222265  | 330 | 97222161  | 5  | 3.4561   |
| 7 | 97910086  | 97910435  | 350 | 97910283  | 8  | 6.50668  |
| 7 | 105118256 | 105118623 | 368 | 105118310 | 7  | 5.47978  |
| 7 | 105201462 | 105201821 | 360 | 105201718 | 6  | 3.79171  |
| 7 | 105422808 | 105423201 | 394 | 105423135 | 6  | 3.66421  |
| 7 | 106630352 | 106630674 | 323 | 106630453 | 5  | 3.58241  |
| 7 | 107927566 | 107927870 | 305 | 107927815 | 7  | 5.47978  |
| 7 | 113428224 | 113428527 | 304 | 113428454 | 5  | 3.58241  |
| 7 | 113572063 | 113572366 | 304 | 113572223 | 7  | 4.10626  |
| 7 | 115843210 | 115843541 | 332 | 115843383 | 6  | 4.25501  |
| 7 | 120485923 | 120486242 | 320 | 120486048 | 6  | 4.25501  |
| 7 | 120918675 | 120918977 | 303 | 120918863 | 6  | 3.94077  |
| 7 | 130591992 | 130592375 | 384 | 130592069 | 9  | 6.52524  |
| 7 | 132303099 | 132303460 | 362 | 132303334 | 7  | 5.47978  |
| 7 | 145340963 | 145341449 | 487 | 145341286 | 30 | 21.28436 |
| 8 | 3012532   | 3012862   | 331 | 3012673   | 5  | 3.1094   |
| 8 | 4685122   | 4685478   | 357 | 4685429   | 10 | 6.95899  |
| 8 | 5145405   | 5145927   | 523 | 5145749   | 6  | 4.40359  |
| 8 | 5649468   | 5649823   | 356 | 5649739   | 7  | 4.68558  |
| 8 | 6076889   | 6077198   | 310 | 6077095   | 8  | 5.39858  |
| 8 | 6434390   | 6434701   | 312 | 6434688   | 8  | 5.39858  |
| 8 | 6601959   | 6602378   | 420 | 6602183   | 8  | 5.56774  |
| 8 | 6992360   | 6992714   | 355 | 6992475   | 5  | 3.07446  |
| 8 | 9421011   | 9421360   | 350 | 9421153   | 8  | 6.50668  |
| 8 | 9617173   | 9617506   | 334 | 9617466   | 7  | 5.47978  |
| 8 | 10025585  | 10025902  | 318 | 10025757  | 6  | 3.79171  |
| 8 | 15707330  | 15707634  | 305 | 15707534  | 5  | 3.4561   |
| 8 | 16013106  | 16013416  | 311 | 16013286  | 6  | 3.79171  |
| 8 | 16338998  | 16339323  | 326 | 16339175  | 7  | 5.47978  |
| 8 | 16913079  | 16913430  | 352 | 16913197  | 7  | 5.36479  |
| 8 | 17726464  | 17726812  | 349 | 17726631  | 7  | 3.99741  |
| 8 | 18162826  | 18163128  | 303 | 18162945  | 7  | 5.47978  |
| 8 | 19801663  | 19802037  | 375 | 19801881  | 14 | 5.35226  |
| 8 | 19934095  | 19934607  | 513 | 19934394  | 23 | 3.25325  |
| 8 | 20041636  | 20042350  | 715 | 20042135  | 17 | 4.64765  |
| 8 | 20065553  | 20065930  | 378 | 20065675  | 19 | 6.43863  |
| 8 | 20106418  | 20106768  | 351 | 20106489  | 24 | 6.38156  |
| 8 | 20116922  | 20117267  | 346 | 20117067  | 24 | 7.33297  |
| 8 | 20273579  | 20274366  | 788 | 20274064  | 27 | 5.19134  |
| 8 | 20331774  | 20332183  | 410 | 20332050  | 30 | 5.28759  |
| 8 | 20515825  | 20516636  | 812 | 20516112  | 27 | 6.08395  |

|   |          |          |     |          |    |          |
|---|----------|----------|-----|----------|----|----------|
| 8 | 20520461 | 20520874 | 414 | 20520587 | 43 | 12.36678 |
| 8 | 20542779 | 20543134 | 356 | 20543025 | 22 | 4.23158  |
| 8 | 20577257 | 20577801 | 545 | 20577519 | 24 | 3.94537  |
| 8 | 20612655 | 20612991 | 337 | 20612752 | 26 | 4.04456  |
| 8 | 20620443 | 20620795 | 353 | 20620505 | 19 | 5.09378  |
| 8 | 20626050 | 20626399 | 350 | 20626193 | 30 | 7.6031   |
| 8 | 20652427 | 20652760 | 334 | 20652501 | 17 | 4.64765  |
| 8 | 20687265 | 20687813 | 549 | 20687301 | 20 | 5.12562  |
| 8 | 20867621 | 20868079 | 459 | 20867935 | 6  | 4.07032  |
| 8 | 21955597 | 21955931 | 335 | 21955619 | 8  | 4.19779  |
| 8 | 28160257 | 28160723 | 467 | 28160532 | 7  | 5.47978  |
| 8 | 28187493 | 28187802 | 310 | 28187747 | 6  | 4.50291  |
| 8 | 28677277 | 28677652 | 376 | 28677324 | 5  | 3.58241  |
| 8 | 29916253 | 29916578 | 326 | 29916309 | 6  | 4.16086  |
| 8 | 30905539 | 30905869 | 331 | 30905674 | 5  | 3.49869  |
| 8 | 32274601 | 32274904 | 304 | 32274810 | 6  | 4.07032  |
| 8 | 36983420 | 36983752 | 333 | 36983596 | 7  | 4.65491  |
| 8 | 37566032 | 37566425 | 394 | 37566379 | 8  | 4.94122  |
| 8 | 37712144 | 37712513 | 370 | 37712341 | 8  | 4.19779  |
| 8 | 41063710 | 41064177 | 468 | 41063839 | 7  | 4.82809  |
| 8 | 41888394 | 41888849 | 456 | 41888700 | 7  | 3.45771  |
| 8 | 41977280 | 41977640 | 361 | 41977301 | 7  | 5.13754  |
| 8 | 43501649 | 43501954 | 306 | 43501943 | 9  | 3.19498  |
| 8 | 50055765 | 50056086 | 322 | 50055781 | 7  | 4.5946   |
| 8 | 50640763 | 50641069 | 307 | 50640913 | 6  | 3.8181   |
| 8 | 50807494 | 50807854 | 361 | 50807841 | 7  | 4.92742  |
| 8 | 50983696 | 50984028 | 333 | 50983697 | 6  | 3.79171  |
| 8 | 51068179 | 51068634 | 456 | 51068434 | 7  | 5.47978  |
| 8 | 52048013 | 52048367 | 355 | 52048145 | 7  | 5.47978  |
| 8 | 52311296 | 52311606 | 311 | 52311362 | 6  | 4.50291  |
| 8 | 52389875 | 52390178 | 304 | 52390090 | 6  | 3.66421  |
| 8 | 52484480 | 52484847 | 368 | 52484743 | 10 | 5.80609  |
| 8 | 52541392 | 52541726 | 335 | 52541693 | 6  | 3.98315  |
| 8 | 52637330 | 52637699 | 370 | 52637342 | 5  | 3.18126  |
| 8 | 52689412 | 52689730 | 319 | 52689646 | 5  | 3.4561   |
| 8 | 53053974 | 53054280 | 307 | 53054163 | 6  | 3.94077  |
| 8 | 53062175 | 53062504 | 330 | 53062369 | 7  | 4.82809  |
| 8 | 53189316 | 53189641 | 326 | 53189537 | 7  | 4.82809  |
| 8 | 53807844 | 53808471 | 628 | 53808093 | 7  | 4.92742  |
| 8 | 54926648 | 54927235 | 588 | 54927200 | 7  | 4.82809  |
| 8 | 55121274 | 55121592 | 319 | 55121458 | 29 | 7.64125  |
| 8 | 55869977 | 55870345 | 369 | 55870288 | 6  | 4.07032  |
| 8 | 56074291 | 56074643 | 353 | 56074393 | 6  | 4.50291  |
| 8 | 56345083 | 56345390 | 308 | 56345117 | 6  | 4.50291  |
| 8 | 56879161 | 56879477 | 317 | 56879278 | 5  | 3.41441  |
| 8 | 57735671 | 57736008 | 338 | 57735881 | 8  | 6.50668  |
| 8 | 57968367 | 57968872 | 506 | 57968698 | 6  | 4.25501  |
| 8 | 57976764 | 57977105 | 342 | 57976955 | 6  | 4.50291  |

|   |          |          |     |          |    |         |
|---|----------|----------|-----|----------|----|---------|
| 8 | 57977668 | 57977968 | 301 | 57977726 | 8  | 5.56774 |
| 8 | 58023985 | 58024334 | 350 | 58024207 | 7  | 3.45771 |
| 8 | 58476343 | 58476703 | 361 | 58476569 | 8  | 5.87829 |
| 8 | 58654183 | 58654496 | 314 | 58654391 | 9  | 6.93917 |
| 8 | 58732570 | 58733065 | 496 | 58732638 | 8  | 4.19779 |
| 8 | 59224747 | 59225117 | 371 | 59224950 | 7  | 4.10626 |
| 8 | 60092743 | 60093282 | 540 | 60093104 | 8  | 6.50668 |
| 8 | 60275264 | 60275615 | 352 | 60275295 | 6  | 3.3206  |
| 8 | 60686133 | 60686490 | 358 | 60686322 | 5  | 3.58241 |
| 8 | 62208344 | 62208678 | 335 | 62208509 | 8  | 6.50668 |
| 8 | 62652382 | 62652748 | 367 | 62652542 | 16 | 8.12061 |
| 8 | 63488685 | 63489036 | 352 | 63488870 | 8  | 5.11589 |
| 8 | 63516042 | 63516446 | 405 | 63516206 | 5  | 3.58241 |
| 8 | 63585609 | 63585980 | 372 | 63585687 | 8  | 5.76514 |
| 8 | 63695196 | 63695545 | 350 | 63695338 | 7  | 4.97847 |
| 8 | 63749651 | 63749972 | 322 | 63749942 | 6  | 3.79171 |
| 8 | 63765305 | 63765796 | 492 | 63765581 | 8  | 6.30939 |
| 8 | 65407079 | 65407569 | 491 | 65407402 | 6  | 4.35303 |
| 8 | 65408718 | 65409027 | 310 | 65408869 | 9  | 6.93917 |
| 8 | 65642882 | 65643235 | 354 | 65643148 | 6  | 3.8181  |
| 8 | 66238113 | 66238418 | 306 | 66238349 | 6  | 3.62733 |
| 8 | 66385581 | 66385895 | 315 | 66385801 | 6  | 4.20747 |
| 8 | 66518607 | 66518951 | 345 | 66518622 | 5  | 3.58241 |
| 8 | 66654773 | 66655089 | 317 | 66654935 | 9  | 6.52524 |
| 8 | 67829308 | 67829642 | 335 | 67829556 | 7  | 3.76048 |
| 8 | 69253126 | 69253447 | 322 | 69253402 | 6  | 3.79171 |
| 8 | 69311903 | 69312209 | 307 | 69312020 | 8  | 4.19779 |
| 8 | 71807150 | 71807656 | 507 | 71807197 | 10 | 4.54498 |
| 8 | 73073983 | 73074369 | 387 | 73074025 | 6  | 4.50291 |
| 8 | 73547370 | 73547734 | 365 | 73547370 | 8  | 3.28682 |
| 8 | 74143205 | 74143507 | 303 | 74143414 | 7  | 5.47978 |
| 8 | 74366794 | 74367120 | 327 | 74367107 | 6  | 3.66421 |
| 8 | 75663106 | 75663559 | 454 | 75663317 | 6  | 3.79171 |
| 8 | 76054971 | 76055287 | 317 | 76055247 | 6  | 3.02469 |
| 8 | 76214967 | 76215279 | 313 | 76215019 | 5  | 3.00646 |
| 8 | 76906053 | 76906396 | 344 | 76906257 | 8  | 6.50668 |
| 8 | 77175229 | 77175590 | 362 | 77175531 | 6  | 4.16086 |
| 8 | 77275897 | 77276232 | 336 | 77276211 | 6  | 4.50291 |
| 8 | 78033381 | 78033869 | 489 | 78033384 | 7  | 3.45771 |
| 8 | 78431213 | 78431517 | 305 | 78431369 | 6  | 4.30352 |
| 8 | 79847332 | 79847689 | 358 | 79847539 | 6  | 3.79171 |
| 8 | 80083963 | 80084264 | 302 | 80084222 | 7  | 4.50662 |
| 8 | 80242915 | 80243287 | 373 | 80243195 | 6  | 4.50291 |
| 8 | 80339082 | 80339723 | 642 | 80339135 | 7  | 4.339   |
| 8 | 81142313 | 81142643 | 331 | 81142339 | 8  | 3.28682 |
| 8 | 81190767 | 81191074 | 308 | 81190988 | 8  | 5.60272 |
| 8 | 81460196 | 81460501 | 306 | 81460472 | 7  | 3.45771 |
| 8 | 81539775 | 81540143 | 369 | 81539801 | 5  | 3.58241 |

|   |           |           |     |           |      |           |
|---|-----------|-----------|-----|-----------|------|-----------|
| 8 | 82423575  | 82423925  | 351 | 82423764  | 7    | 4.82809   |
| 8 | 82534451  | 82534925  | 475 | 82534761  | 7    | 5.19265   |
| 8 | 90706605  | 90706949  | 345 | 90706859  | 8    | 6.50668   |
| 8 | 91014910  | 91015240  | 331 | 91014964  | 6    | 3.73984   |
| 8 | 91473442  | 91473755  | 314 | 91473684  | 6    | 4.45522   |
| 8 | 91745193  | 91745534  | 342 | 91745278  | 6    | 4.50291   |
| 8 | 93504423  | 93504795  | 373 | 93504537  | 8    | 5.93643   |
| 8 | 96205426  | 96205882  | 457 | 96205802  | 6    | 4.20747   |
| 8 | 96742441  | 96742774  | 334 | 96742765  | 8    | 4.19779   |
| 8 | 96901957  | 96902283  | 327 | 96901981  | 5    | 3.58241   |
| 8 | 96942352  | 96942692  | 341 | 96942409  | 7    | 5.47978   |
| 8 | 96947626  | 96947972  | 347 | 96947901  | 6    | 3.89915   |
| 8 | 97224062  | 97224450  | 389 | 97224184  | 5    | 3.58241   |
| 8 | 97784778  | 97785149  | 372 | 97784888  | 8    | 6.50668   |
| 8 | 97826115  | 97826567  | 453 | 97826260  | 5    | 3.00646   |
| 8 | 98560486  | 98561011  | 526 | 98560957  | 6    | 4.50291   |
| 8 | 98835622  | 98835959  | 338 | 98835827  | 5    | 3.21823   |
| 8 | 99048814  | 99049149  | 336 | 99049014  | 5    | 3.04015   |
| 8 | 99240270  | 99240632  | 363 | 99240280  | 6    | 3.79171   |
| 8 | 99615125  | 99615475  | 351 | 99615235  | 5    | 3.29435   |
| 8 | 100040232 | 100040647 | 416 | 100040552 | 7    | 5.47978   |
| 8 | 100684145 | 100684479 | 335 | 100684397 | 7    | 5.47978   |
| 8 | 101224584 | 101224932 | 349 | 101224653 | 9    | 6.93917   |
| 8 | 101501101 | 101501459 | 359 | 101501200 | 9    | 7.57852   |
| 8 | 101514880 | 101515364 | 485 | 101515006 | 6    | 3.98315   |
| 8 | 101670952 | 101671274 | 323 | 101671168 | 9    | 6.87393   |
| 8 | 101878976 | 101879305 | 330 | 101879252 | 8    | 6.50668   |
| 8 | 103119378 | 103120074 | 697 | 103119513 | 5    | 3.58241   |
| 8 | 104224664 | 104225049 | 386 | 104224815 | 7    | 5.47978   |
| 8 | 107544892 | 107545267 | 376 | 107545137 | 7    | 4.97847   |
| 8 | 107761559 | 107761891 | 333 | 107761586 | 7    | 5.47978   |
| 8 | 112513445 | 112513832 | 388 | 112513446 | 7    | 3.45771   |
| 8 | 112928421 | 112928774 | 354 | 112928721 | 7    | 5.47978   |
| 8 | 122901840 | 122902144 | 305 | 122902033 | 6    | 3.70171   |
| 8 | 123289986 | 123290381 | 396 | 123290015 | 6    | 4.50291   |
| 8 | 125330985 | 125331352 | 368 | 125331020 | 5    | 3.58241   |
| 8 | 126013696 | 126013995 | 300 | 126013880 | 7    | 5.30623   |
| 8 | 128076813 | 128077130 | 318 | 128076926 | 7    | 4.6397    |
| 8 | 128870081 | 128870398 | 318 | 128870241 | 8    | 4.23065   |
| 8 | 128991271 | 128991587 | 317 | 128991401 | 8    | 5.49896   |
| 9 | 3000272   | 3000628   | 357 | 3000489   | 3637 | 173.2421  |
| 9 | 3001143   | 3001479   | 337 | 3001374   | 1305 | 21.6053   |
| 9 | 3002027   | 3002332   | 306 | 3002136   | 2034 | 36.96147  |
| 9 | 3003330   | 3003696   | 367 | 3003430   | 981  | 56.78593  |
| 9 | 3010802   | 3011117   | 316 | 3010970   | 323  | 30.94559  |
| 9 | 3013157   | 3013514   | 358 | 3013266   | 353  | 24.30591  |
| 9 | 3014042   | 3014348   | 307 | 3014150   | 780  | 26.81595  |
| 9 | 3017812   | 3018675   | 864 | 3018578   | 1512 | 141.16684 |

|   |          |          |      |          |      |           |
|---|----------|----------|------|----------|------|-----------|
| 9 | 3019916  | 3021127  | 1212 | 3020930  | 792  | 14.54441  |
| 9 | 3024125  | 3024547  | 423  | 3024480  | 1558 | 43.65961  |
| 9 | 3025477  | 3025922  | 446  | 3025734  | 1325 | 145.7924  |
| 9 | 3029458  | 3029809  | 352  | 3029747  | 954  | 17.81334  |
| 9 | 3032075  | 3032722  | 648  | 3032429  | 1489 | 63.67994  |
| 9 | 3034641  | 3035222  | 582  | 3035082  | 1409 | 69.84364  |
| 9 | 3037850  | 3038231  | 382  | 3038022  | 1097 | 111.33739 |
| 9 | 3676894  | 3677217  | 324  | 3677031  | 8    | 5.56774   |
| 9 | 5673940  | 5674258  | 319  | 5673976  | 7    | 5.03049   |
| 9 | 5989268  | 5990312  | 1045 | 5989997  | 7    | 4.73225   |
| 9 | 7087363  | 7087686  | 324  | 7087525  | 6    | 4.40359   |
| 9 | 8279237  | 8279543  | 307  | 8279397  | 7    | 5.47978   |
| 9 | 10546595 | 10547118 | 524  | 10546727 | 5    | 3.58241   |
| 9 | 10930917 | 10931232 | 316  | 10930980 | 6    | 3.79171   |
| 9 | 11413570 | 11413949 | 380  | 11413618 | 6    | 4.50291   |
| 9 | 11606997 | 11607316 | 320  | 11607191 | 6    | 4.50291   |
| 9 | 11825018 | 11825434 | 417  | 11825163 | 7    | 5.47978   |
| 9 | 12196620 | 12196966 | 347  | 12196699 | 5    | 3.41441   |
| 9 | 12435968 | 12436276 | 309  | 12436057 | 6    | 4.50291   |
| 9 | 16775457 | 16775773 | 317  | 16775691 | 6    | 4.50291   |
| 9 | 17739413 | 17739724 | 312  | 17739708 | 7    | 3.76048   |
| 9 | 18441967 | 18442305 | 339  | 18442035 | 8    | 6.50668   |
| 9 | 25852819 | 25853123 | 305  | 25853082 | 8    | 4.19779   |
| 9 | 26360099 | 26360432 | 334  | 26360176 | 5    | 3.58241   |
| 9 | 28836577 | 28836904 | 328  | 28836872 | 6    | 3.79171   |
| 9 | 31523806 | 31524125 | 320  | 31524011 | 6    | 4.50291   |
| 9 | 32232157 | 32232481 | 325  | 32232178 | 5    | 3.14499   |
| 9 | 32342571 | 32342884 | 314  | 32342872 | 6    | 3.79171   |
| 9 | 32355166 | 32355493 | 328  | 32355361 | 23   | 23.12246  |
| 9 | 32356025 | 32356374 | 350  | 32356226 | 22   | 24.33764  |
| 9 | 33317208 | 33317589 | 382  | 33317312 | 8    | 6.11749   |
| 9 | 36003847 | 36004588 | 742  | 36003942 | 6    | 3.79171   |
| 9 | 37889668 | 37889981 | 314  | 37889895 | 6    | 4.50291   |
| 9 | 38017236 | 38017593 | 358  | 38017304 | 5    | 3.58241   |
| 9 | 38178721 | 38179228 | 508  | 38178910 | 5    | 3.21823   |
| 9 | 38322598 | 38322915 | 318  | 38322633 | 5    | 3.58241   |
| 9 | 39372523 | 39372862 | 340  | 39372544 | 6    | 3.79171   |
| 9 | 39911591 | 39911898 | 308  | 39911684 | 6    | 3.66421   |
| 9 | 49281980 | 49282302 | 323  | 49282194 | 6    | 4.50291   |
| 9 | 52365595 | 52365917 | 323  | 52365754 | 7    | 5.47978   |
| 9 | 52438488 | 52438809 | 322  | 52438666 | 7    | 4.82809   |
| 9 | 53962678 | 53962986 | 309  | 53962898 | 7    | 5.47978   |
| 9 | 55074676 | 55075123 | 448  | 55074914 | 8    | 6.50668   |
| 9 | 63532906 | 63533209 | 304  | 63533005 | 5    | 3.58241   |
| 9 | 68538869 | 68539197 | 329  | 68539154 | 7    | 5.47978   |
| 9 | 72238480 | 72238892 | 413  | 72238495 | 6    | 3.3206    |
| 9 | 73457254 | 73457575 | 322  | 73457368 | 7    | 4.97847   |
| 9 | 75831804 | 75832327 | 524  | 75832028 | 5    | 3.41441   |

|        |           |           |      |           |     |           |
|--------|-----------|-----------|------|-----------|-----|-----------|
| 9      | 76353280  | 76353620  | 341  | 76353512  | 7   | 4.65491   |
| 9      | 76519387  | 76519692  | 306  | 76519532  | 5   | 3.58241   |
| 9      | 77203879  | 77204222  | 344  | 77204017  | 6   | 4.50291   |
| 9      | 77463774  | 77464086  | 313  | 77463839  | 6   | 4.50291   |
| 9      | 82332894  | 82333244  | 351  | 82333000  | 7   | 3.45771   |
| 9      | 82517569  | 82517885  | 317  | 82517649  | 7   | 4.77975   |
| 9      | 84558340  | 84558706  | 367  | 84558477  | 9   | 6.28009   |
| 9      | 86299205  | 86299570  | 366  | 86299422  | 6   | 4.02633   |
| 9      | 87653423  | 87653736  | 314  | 87653616  | 6   | 4.50291   |
| 9      | 87893864  | 87894201  | 338  | 87894163  | 6   | 4.07032   |
| 9      | 87969950  | 87970256  | 307  | 87970119  | 6   | 4.40359   |
| 9      | 88893442  | 88893793  | 352  | 88893728  | 6   | 3.94077   |
| 9      | 89204886  | 89205306  | 421  | 89204986  | 7   | 4.73225   |
| 9      | 89572593  | 89572946  | 354  | 89572808  | 6   | 4.50291   |
| 9      | 90451439  | 90451746  | 308  | 90451567  | 7   | 4.65491   |
| 9      | 90547335  | 90547710  | 376  | 90547514  | 8   | 5.56774   |
| 9      | 91424351  | 91424663  | 313  | 91424359  | 5   | 3.21823   |
| 9      | 92696133  | 92696453  | 321  | 92696366  | 8   | 5.56774   |
| 9      | 97036204  | 97036550  | 347  | 97036283  | 6   | 4.50291   |
| 9      | 97641474  | 97641805  | 332  | 97641617  | 6   | 4.50291   |
| 9      | 98612093  | 98612422  | 330  | 98612274  | 6   | 4.50291   |
| 9      | 107216264 | 107216596 | 333  | 107216389 | 9   | 7.28429   |
| 9      | 111593008 | 111593331 | 324  | 111593160 | 7   | 5.47978   |
| 9      | 114252341 | 114252877 | 537  | 114252468 | 9   | 5.68029   |
| 9      | 114338815 | 114339131 | 317  | 114338910 | 6   | 4.20747   |
| 9      | 117224449 | 117224750 | 302  | 117224510 | 5   | 3.58241   |
| 9      | 121939383 | 121939705 | 323  | 121939659 | 5   | 3.58241   |
| 9      | 123461821 | 123462192 | 372  | 123461990 | 196 | 112.01627 |
| 9      | 123832262 | 123832575 | 314  | 123832295 | 5   | 3.58241   |
| 9      | 124022784 | 124023107 | 324  | 124022973 | 7   | 5.47978   |
| CHR_M  | 46157154  | 46157522  | 369  | 46157386  | 10  | 7.52331   |
| CHR_M  | 15470375  | 15470735  | 361  | 15470501  | 29  | 8.25048   |
| CHR_M  | 15512912  | 15513259  | 348  | 15512948  | 18  | 3.69949   |
| CHR_M  | 15585559  | 15585895  | 337  | 15585655  | 8   | 4.65848   |
| CHR_M  | 15610204  | 15610570  | 367  | 15610446  | 17  | 5.94093   |
| GL4562 | 38985     | 39348     | 364  | 39142     | 7   | 4.6397    |
| GL4562 | 84862     | 85253     | 392  | 85029     | 8   | 5.56774   |
| GL4562 | 86666     | 86968     | 303  | 86771     | 7   | 4.97847   |
| GL4562 | 171451    | 171862    | 412  | 171591    | 11  | 4.44564   |
| GL4563 | 826       | 1421      | 596  | 1291      | 7   | 5.47978   |
| GL4563 | 5626      | 6154      | 529  | 5692      | 5   | 3.5422    |
| JH5843 | 68550     | 69734     | 1185 | 69629     | 505 | 38.53638  |
| JH5843 | 70742     | 71359     | 618  | 71040     | 412 | 37.88798  |
| JH5843 | 73079     | 73442     | 364  | 73175     | 856 | 74.33173  |
| JH5843 | 75590     | 76063     | 474  | 75922     | 491 | 40.39774  |
| JH5843 | 77981     | 79487     | 1507 | 79350     | 821 | 32.44351  |
| JH5843 | 81266     | 81700     | 435  | 81588     | 411 | 81.95245  |
| JH5843 | 83611     | 84212     | 602  | 83939     | 407 | 22.63985  |

|        |          |          |      |          |      |          |
|--------|----------|----------|------|----------|------|----------|
| JH5843 | 85491    | 85882    | 392  | 85777    | 449  | 22.7147  |
| JH5843 | 87716    | 88394    | 679  | 88050    | 366  | 15.45717 |
| JH5843 | 89374    | 91473    | 2100 | 90193    | 231  | 10.89761 |
| JH5843 | 92746    | 93342    | 597  | 93096    | 445  | 21.20879 |
| JH5843 | 94596    | 94994    | 399  | 94889    | 389  | 27.55641 |
| JH5843 | 97099    | 97536    | 438  | 97456    | 159  | 5.60367  |
| JH5843 | 100429   | 101303   | 875  | 101167   | 435  | 26.88577 |
| JH5843 | 103222   | 104721   | 1500 | 103537   | 1007 | 80.72006 |
| JH5843 | 107310   | 107613   | 304  | 107482   | 268  | 27.77179 |
| JH5843 | 108902   | 109424   | 523  | 109191   | 651  | 47.91598 |
| JH5843 | 110743   | 111128   | 386  | 111016   | 429  | 26.32745 |
| JH5843 | 112993   | 113401   | 409  | 113286   | 834  | 54.48454 |
| X      | 3724404  | 3724739  | 336  | 3724480  | 7    | 5.47978  |
| X      | 4106015  | 4106427  | 413  | 4106262  | 8    | 6.11749  |
| X      | 4355141  | 4355476  | 336  | 4355262  | 6    | 4.20747  |
| X      | 4555527  | 4555845  | 319  | 4555751  | 8    | 6.50668  |
| X      | 4953772  | 4954117  | 346  | 4953911  | 7    | 5.47978  |
| X      | 5831414  | 5831828  | 415  | 5831655  | 6    | 4.50291  |
| X      | 9745340  | 9745642  | 303  | 9745524  | 7    | 5.47978  |
| X      | 23976681 | 23977081 | 401  | 23976843 | 9    | 7.57852  |
| X      | 27996123 | 27996477 | 355  | 27996267 | 6    | 4.50291  |
| X      | 28001760 | 28002119 | 360  | 28002103 | 5    | 3.58241  |
| X      | 31200155 | 31200649 | 495  | 31200209 | 11   | 5.38864  |
| X      | 31741300 | 31741820 | 521  | 31741678 | 9    | 4.63301  |
| X      | 32178790 | 32179117 | 328  | 32178932 | 6    | 3.79171  |
| X      | 32465153 | 32465471 | 319  | 32465424 | 8    | 5.56774  |
| X      | 33537182 | 33537629 | 448  | 33537493 | 9    | 6.33515  |
| X      | 33886531 | 33886848 | 318  | 33886538 | 5    | 3.49869  |
| X      | 34462646 | 34462956 | 311  | 34462700 | 7    | 3.89308  |
| X      | 35171775 | 35172145 | 371  | 35172002 | 5    | 3.58241  |
| X      | 40225099 | 40225414 | 316  | 40225221 | 6    | 4.50291  |
| X      | 43210314 | 43210656 | 343  | 43210475 | 7    | 5.47978  |
| X      | 45478512 | 45478872 | 361  | 45478703 | 6    | 4.50291  |
| X      | 49297737 | 49298084 | 348  | 49298077 | 6    | 3.79171  |
| X      | 54405824 | 54406143 | 320  | 54406118 | 5    | 3.14499  |
| X      | 54811583 | 54812108 | 526  | 54811887 | 6    | 3.79171  |
| X      | 55003947 | 55004314 | 368  | 55004074 | 6    | 4.50291  |
| X      | 55284140 | 55284494 | 355  | 55284311 | 9    | 6.52524  |
| X      | 57547380 | 57547758 | 379  | 57547706 | 7    | 4.65491  |
| X      | 59654351 | 59654659 | 309  | 59654507 | 6    | 4.50291  |
| X      | 64493789 | 64494090 | 302  | 64493825 | 9    | 5.82058  |
| X      | 66778212 | 66778562 | 351  | 66778271 | 6    | 4.50291  |
| X      | 73244495 | 73244798 | 304  | 73244741 | 6    | 4.50291  |
| X      | 76848835 | 76849180 | 346  | 76849015 | 7    | 5.47978  |
| X      | 77652021 | 77652324 | 304  | 77652033 | 5    | 3.58241  |
| X      | 79622818 | 79623563 | 746  | 79623521 | 7    | 4.65491  |
| X      | 82252880 | 82253199 | 320  | 82252967 | 6    | 4.50291  |
| X      | 92276000 | 92276324 | 325  | 92276138 | 6    | 4.50291  |



|   |           |           |     |           |    |          |
|---|-----------|-----------|-----|-----------|----|----------|
| X | 92402893  | 92403214  | 322 | 92402929  | 5  | 3.58241  |
| X | 99167067  | 99167372  | 306 | 99167104  | 6  | 4.50291  |
| X | 104680416 | 104680775 | 360 | 104680622 | 6  | 4.50291  |
| X | 107259116 | 107259497 | 382 | 107259453 | 7  | 4.65491  |
| X | 108759037 | 108759341 | 305 | 108759070 | 6  | 4.07032  |
| X | 113336795 | 113337213 | 419 | 113337106 | 8  | 6.50668  |
| X | 113912491 | 113912861 | 371 | 113912672 | 9  | 6.33515  |
| X | 115804999 | 115805346 | 348 | 115805167 | 6  | 4.50291  |
| X | 116603423 | 116603928 | 506 | 116603592 | 7  | 5.47978  |
| X | 116822989 | 116823312 | 324 | 116823157 | 7  | 5.47978  |
| X | 121045624 | 121045992 | 369 | 121045825 | 6  | 4.50291  |
| X | 121115583 | 121115892 | 310 | 121115719 | 6  | 4.50291  |
| X | 123446478 | 123446822 | 345 | 123446663 | 11 | 6.66709  |
| X | 123884338 | 123884652 | 315 | 123884358 | 11 | 3.71443  |
| X | 124351212 | 124351529 | 318 | 124351266 | 9  | 3.32934  |
| X | 124464201 | 124464568 | 368 | 124464302 | 9  | 7.57852  |
| X | 124590889 | 124591231 | 343 | 124590988 | 6  | 4.50291  |
| X | 124597312 | 124597655 | 344 | 124597475 | 7  | 5.30623  |
| X | 124672230 | 124672601 | 372 | 124672388 | 12 | 6.16038  |
| X | 125318347 | 125318675 | 329 | 125318397 | 6  | 4.50291  |
| X | 125353061 | 125353396 | 336 | 125353191 | 5  | 3.58241  |
| X | 125682992 | 125683330 | 339 | 125683256 | 9  | 4.98189  |
| X | 126070282 | 126070895 | 614 | 126070617 | 22 | 10.42991 |
| X | 126872015 | 126872339 | 325 | 126872151 | 7  | 5.47978  |
| X | 128062738 | 128063083 | 346 | 128063067 | 6  | 3.79171  |
| X | 128237071 | 128237411 | 341 | 128237325 | 12 | 7.56208  |
| X | 131904432 | 131904736 | 305 | 131904530 | 7  | 5.47978  |
| X | 132195238 | 132195559 | 322 | 132195332 | 5  | 3.5422   |
| X | 134648490 | 134648811 | 322 | 134648491 | 6  | 4.50291  |
| X | 135299682 | 135299995 | 314 | 135299775 | 6  | 4.11516  |
| X | 136162934 | 136163308 | 375 | 136163002 | 7  | 5.47978  |
| X | 139002894 | 139003213 | 320 | 139003115 | 6  | 4.07032  |
| X | 139462237 | 139462596 | 360 | 139462406 | 5  | 3.58241  |
| X | 145115109 | 145115460 | 352 | 145115323 | 14 | 7.7958   |
| X | 145956188 | 145956532 | 345 | 145956324 | 7  | 5.47978  |
| X | 146212714 | 146213156 | 443 | 146212896 | 6  | 4.50291  |
| X | 146842842 | 146843171 | 330 | 146843107 | 7  | 4.10626  |
| X | 148056811 | 148057160 | 350 | 148057042 | 5  | 3.58241  |
| X | 148120146 | 148120471 | 326 | 148120351 | 6  | 4.50291  |
| X | 148545112 | 148545413 | 302 | 148545238 | 6  | 4.50291  |
| X | 150011082 | 150011468 | 387 | 150011385 | 7  | 5.47978  |
| X | 157554345 | 157554839 | 495 | 157554470 | 7  | 5.47978  |
| X | 158213943 | 158214321 | 379 | 158214061 | 7  | 4.65491  |
| X | 160289533 | 160289888 | 356 | 160289713 | 6  | 4.50291  |
| X | 166256909 | 166257233 | 325 | 166257082 | 5  | 3.58241  |
| Y | 4148075   | 4148485   | 411 | 4148291   | 16 | 9.54129  |
| Y | 4150865   | 4151316   | 452 | 4151016   | 20 | 7.06624  |
| Y | 4610135   | 4610459   | 325 | 4610231   | 7  | 5.47978  |

|   |         |         |     |         |    |         |
|---|---------|---------|-----|---------|----|---------|
| Y | 4757151 | 4757521 | 371 | 4757284 | 9  | 7.57852 |
| Y | 4826781 | 4827116 | 336 | 4826860 | 8  | 6.50668 |
| Y | 4837567 | 4837868 | 302 | 4837794 | 8  | 6.50668 |
| Y | 5686243 | 5686594 | 352 | 5686435 | 17 | 7.7367  |
| Y | 5711031 | 5711345 | 315 | 5711250 | 13 | 3.63773 |
| Y | 5759114 | 5759974 | 861 | 5759844 | 30 | 3.95823 |
| Y | 5826533 | 5826904 | 372 | 5826870 | 9  | 4.98189 |
| Y | 5881375 | 5881713 | 339 | 5881469 | 10 | 5.27216 |
| Y | 5947567 | 5947915 | 349 | 5947810 | 14 | 7.7958  |
| Y | 5965667 | 5965988 | 322 | 5965745 | 15 | 5.44265 |
| Y | 5968054 | 5968398 | 345 | 5968109 | 23 | 6.75467 |
| Y | 6047463 | 6047922 | 460 | 6047727 | 58 | 8.93134 |
| Y | 6052965 | 6053288 | 324 | 6053226 | 13 | 5.7029  |
| Y | 6065109 | 6065758 | 650 | 6065447 | 16 | 7.00083 |
| Y | 6070698 | 6071060 | 363 | 6070794 | 16 | 9.54129 |
| Y | 6087013 | 6087778 | 766 | 6087703 | 17 | 11.4215 |
| Y | 6131782 | 6132261 | 480 | 6131838 | 7  | 3.45771 |
| Y | 6216267 | 6216941 | 675 | 6216775 | 12 | 5.03261 |
| Y | 6237200 | 6237817 | 618 | 6237516 | 7  | 5.47978 |
| Y | 6285106 | 6285670 | 565 | 6285306 | 11 | 3.71443 |
| Y | 6300843 | 6301181 | 339 | 6301028 | 8  | 5.56774 |
| Y | 6365430 | 6366105 | 676 | 6365674 | 9  | 7.57852 |
| Y | 6524934 | 6525456 | 523 | 6525349 | 19 | 5.09378 |
| Y | 6530274 | 6530686 | 413 | 6530646 | 16 | 5.69185 |
| Y | 6546470 | 6546848 | 379 | 6546517 | 17 | 5.94093 |
| Y | 6612067 | 6612423 | 357 | 6612304 | 11 | 4.44564 |
| Y | 6675023 | 6675345 | 323 | 6675090 | 15 | 4.14377 |
| Y | 6679051 | 6679378 | 328 | 6679349 | 12 | 3.54844 |
| Y | 6741892 | 6742587 | 696 | 6742485 | 11 | 5.39948 |
| Y | 6758651 | 6758975 | 325 | 6758712 | 13 | 4.714   |
| Y | 6773698 | 6774035 | 338 | 6773990 | 14 | 4.82217 |
| Y | 6787373 | 6787738 | 366 | 6787661 | 16 | 4.12922 |
| Y | 6788719 | 6789176 | 458 | 6788972 | 30 | 8.0666  |
| Y | 6819939 | 6820259 | 321 | 6820074 | 16 | 3.72604 |
| Y | 6839967 | 6840318 | 352 | 6840264 | 14 | 4.17493 |
| Y | 7548286 | 7548594 | 309 | 7548518 | 6  | 4.50291 |
| Y | 7604637 | 7604961 | 325 | 7604887 | 11 | 3.71443 |
| Y | 8543654 | 8544012 | 359 | 8543909 | 18 | 5.18851 |
| Y | 8749128 | 8749657 | 530 | 8749378 | 11 | 9.84109 |
| Y | 8784831 | 8785203 | 373 | 8785183 | 8  | 5.56774 |
| Y | 8821342 | 8821743 | 402 | 8821451 | 16 | 5.32792 |
| Y | 8853193 | 8853572 | 380 | 8853378 | 18 | 8.49552 |
| Y | 8862138 | 8862456 | 319 | 8862185 | 6  | 4.50291 |
| Y | 8881225 | 8881535 | 311 | 8881320 | 9  | 4.98189 |
| Y | 8913437 | 8913796 | 360 | 8913456 | 8  | 5.87829 |
| Y | 8921931 | 8922868 | 938 | 8922701 | 10 | 8.69114 |
| Y | 8975042 | 8975360 | 319 | 8975087 | 15 | 4.73882 |
| Y | 9085733 | 9086070 | 338 | 9085739 | 11 | 3.71443 |

|   |          |          |     |          |    |         |
|---|----------|----------|-----|----------|----|---------|
| Y | 9112450  | 9112765  | 316 | 9112533  | 8  | 5.56774 |
| Y | 9199426  | 9199845  | 420 | 9199677  | 12 | 6.2811  |
| Y | 9330042  | 9330397  | 356 | 9330330  | 8  | 3.28682 |
| Y | 9530632  | 9531222  | 591 | 9530907  | 10 | 4.65057 |
| Y | 9567451  | 9567754  | 304 | 9567544  | 7  | 4.65491 |
| Y | 9568368  | 9568709  | 342 | 9568591  | 7  | 4.65491 |
| Y | 9569167  | 9569527  | 361 | 9569435  | 7  | 4.65491 |
| Y | 10015044 | 10015411 | 368 | 10015127 | 13 | 7.9764  |
| Y | 10094840 | 10095176 | 337 | 10095048 | 9  | 4.98189 |
| Y | 10319341 | 10319837 | 497 | 10319810 | 15 | 5.07533 |
| Y | 10336396 | 10336718 | 323 | 10336590 | 13 | 6.96345 |
| Y | 10510346 | 10510709 | 364 | 10510617 | 8  | 6.50668 |
| Y | 10655934 | 10656257 | 324 | 10655946 | 6  | 4.50291 |
| Y | 12434109 | 12434435 | 327 | 12434140 | 6  | 4.50291 |
| Y | 13429852 | 13430198 | 347 | 13430118 | 7  | 5.47978 |
| Y | 13511110 | 13511557 | 448 | 13511450 | 6  | 3.79171 |
| Y | 13519103 | 13519484 | 382 | 13519247 | 6  | 4.50291 |
| Y | 13552777 | 13553113 | 337 | 13552803 | 7  | 4.10626 |
| Y | 16464089 | 16464400 | 312 | 16464251 | 10 | 4.65057 |
| Y | 17060595 | 17060923 | 329 | 17060760 | 10 | 5.41652 |
| Y | 18096960 | 18097305 | 346 | 18097072 | 11 | 8.55855 |
| Y | 18258380 | 18259079 | 700 | 18259047 | 6  | 3.66421 |
| Y | 19596527 | 19596868 | 342 | 19596532 | 8  | 3.28682 |
| Y | 20198206 | 20199003 | 798 | 20198685 | 8  | 4.19779 |
| Y | 21541231 | 21541574 | 344 | 21541406 | 7  | 4.65491 |
| Y | 21689626 | 21689979 | 354 | 21689848 | 8  | 6.50668 |
| Y | 23116921 | 23117276 | 356 | 23117023 | 6  | 4.50291 |
| Y | 34728945 | 34729296 | 352 | 34729245 | 9  | 3.94891 |
| Y | 37740428 | 37740774 | 347 | 37740519 | 8  | 6.50668 |
| Y | 38134807 | 38135196 | 390 | 38134817 | 6  | 4.50291 |
| Y | 39079212 | 39079551 | 340 | 39079271 | 9  | 4.63301 |
| Y | 39098665 | 39099056 | 392 | 39098812 | 14 | 6.56676 |
| Y | 40160927 | 40161264 | 338 | 40161088 | 10 | 4.65057 |
| Y | 40644608 | 40644929 | 322 | 40644834 | 6  | 4.50291 |
| Y | 40833702 | 40834014 | 313 | 40833932 | 11 | 6.66709 |
| Y | 40951384 | 40951722 | 339 | 40951436 | 5  | 3.58241 |
| Y | 41098160 | 41098500 | 341 | 41098411 | 6  | 4.50291 |
| Y | 41340324 | 41340669 | 346 | 41340421 | 7  | 4.65491 |
| Y | 41450989 | 41451293 | 305 | 41451126 | 8  | 5.56774 |
| Y | 41492475 | 41492804 | 330 | 41492635 | 8  | 5.56774 |
| Y | 41684742 | 41685359 | 618 | 41685074 | 12 | 4.31384 |
| Y | 43374751 | 43375120 | 370 | 43374773 | 11 | 3.71443 |
| Y | 43390944 | 43391247 | 304 | 43391118 | 5  | 3.58241 |
| Y | 43403736 | 43404088 | 353 | 43403873 | 8  | 6.50668 |
| Y | 43491644 | 43491973 | 330 | 43491649 | 10 | 3.72945 |
| Y | 43992297 | 43992602 | 306 | 43992351 | 8  | 6.50668 |
| Y | 45004586 | 45005060 | 475 | 45004793 | 8  | 5.56774 |
| Y | 46509518 | 46509843 | 326 | 46509699 | 11 | 4.44564 |

|   |          |          |     |          |    |         |
|---|----------|----------|-----|----------|----|---------|
| Y | 47895355 | 47895693 | 339 | 47895502 | 6  | 4.50291 |
| Y | 67964013 | 67964359 | 347 | 67964080 | 7  | 3.45771 |
| Y | 67994108 | 67994431 | 324 | 67994133 | 7  | 5.47978 |
| Y | 68423359 | 68423684 | 326 | 68423424 | 7  | 5.47978 |
| Y | 74998525 | 74998922 | 398 | 74998651 | 8  | 6.50668 |
| Y | 89410240 | 89410627 | 388 | 89410387 | 6  | 4.50291 |
| Y | 89849025 | 89849797 | 773 | 89849702 | 14 | 6.56676 |

## S4\_CHIP-seq and RNA-seq overlap data

| #ID                | preferredName      | log2FC       | regulated |
|--------------------|--------------------|--------------|-----------|
| ENSMUSG00000012428 | Steap4             | -7.517361395 | down      |
| ENSMUSG00000022912 | Pros1              | -10.22949046 | down      |
| ENSMUSG00000041695 | Kcnj2              | -3.105578029 | down      |
| ENSMUSG00000022707 | Gbe1               | -1.692641798 | down      |
| ENSMUSG00000064373 | Sepp1              | -2.765762098 | down      |
| ENSMUSG00000052353 | Cemip              | -1.678089661 | down      |
| ENSMUSG00000035158 | Mitf               | -2.227090976 | down      |
| ENSMUSG00000032374 | Plod2              | -1.332077032 | down      |
| ENSMUSG00000024924 | Vldlr              | -1.375450842 | down      |
| ENSMUSG00000060961 | Slc4a4             | -1.631462097 | down      |
| ENSMUSG00000029108 | Pcdh7              | -1.25513396  | down      |
| ENSMUSG00000030022 | Adamts9            | -1.350785515 | down      |
| ENSMUSG00000028015 | Ctso               | -1.721168394 | down      |
| ENSMUSG00000060459 | Kng2               | -2.417423866 | down      |
| ENSMUSG00000052331 | Ankrd44            | -1.347148941 | down      |
| ENSMUSG00000055322 | Tns1               | -1.119228301 | down      |
| ENSMUSG00000074794 | Arrdc3             | -1.199486687 | down      |
| ENSMUSG00000035109 | Shc4               | -1.06601923  | down      |
| ENSMUSG00000021196 | Pfkip              | -1.019749826 | down      |
| ENSMUSG00000075324 | Fign               | -1.489252747 | down      |
| ENSMUSG00000036334 | Igsf10             | -1.336741434 | down      |
| ENSMUSG00000053470 | Kdm3a              | -1.010491068 | down      |
| ENSMUSG00000052477 | ENSMUSG00000052477 | -1.324429832 | down      |
| ENSMUSG00000028926 | Cdk14              | -0.975897524 | down      |
| ENSMUSG00000031647 | Mfap3l             | -2.255717159 | down      |
| ENSMUSG00000038070 | Cntln              | -1.064321565 | down      |
| ENSMUSG00000022123 | Scel               | -3.256928421 | down      |
| ENSMUSG00000019947 | Arid5b             | -0.950446079 | down      |
| ENSMUSG00000002107 | Celf2              | -0.960239442 | down      |
| ENSMUSG00000030029 | Lrig1              | -0.89702451  | down      |
| ENSMUSG00000025986 | Slc39a10           | -0.93115745  | down      |
| ENSMUSG00000029648 | Flt1               | -0.971498895 | down      |
| ENSMUSG00000005534 | Insr               | -0.909098754 | down      |
| ENSMUSG00000024978 | Gpam               | -0.817891349 | down      |
| ENSMUSG00000056536 | Pign               | -0.778441363 | down      |
| ENSMUSG00000019997 | Ctgf               | 1.796831517  | up        |
| ENSMUSG00000039316 | Rftn1              | 3.757795113  | up        |
| ENSMUSG00000036256 | Igfbp7             | 1.276285422  | up        |
| ENSMUSG00000022325 | Pop1               | 1.249819309  | up        |
| ENSMUSG00000078497 | Gm13145            | 1.957498468  | up        |
| ENSMUSG00000034892 | Rps29              | 1.085496168  | up        |
| ENSMUSG00000022321 | Cdh10              | 7.573961813  | up        |
| ENSMUSG00000027276 | Jag1               | 1.308013124  | up        |
| ENSMUSG00000090854 | Gm4340             | 3.093736382  | up        |
| ENSMUSG00000020375 | Rufy1              | 1.063532123  | up        |
| ENSMUSG00000071052 | Rpl7a-ps5          | 1.286514581  | up        |
| ENSMUSG00000027405 | Nop56              | 0.803395842  | up        |

## S5\_quality control

| Type     | Samples | Clean reads | Clean bases   | GC Content | % $\geq$ Q30 |
|----------|---------|-------------|---------------|------------|--------------|
| RNA-seq  | HT22    | 23,018,655  | 6,879,382,152 | 50.76%     | 91.18%       |
| RNA-seq  | Pura-KO | 23,425,924  | 7,008,656,052 | 51.01%     | 91.89%       |
| ChIP-seq | input   | 15041364    | 4512409200    | 41.72      | 83.57        |
| ChIP-seq | Pura    | 13231301    | 3969390300    | 37.11      | 87.34        |
